# Supplementary material
Source: bioRxiv or medRxiv preprint supplement (https://www.biorxiv.org/highwire/filestream/122609/field_highwire_adjunct_files/0/404061-1.pdf)
Supplement: Supplementary file [file 404061-1.pdf]

## **Supplemental Methods**

### Cell Culture

AS iPSC (AS del 1-0) and PWS iPSC (PWS del 1-7) lines were generated and maintained as previously described(1). Briefly, iPSCs were cultured in hESC medium with the following components. Dulbecco's modified Eagle's medium/F-12, 20% Knock-Out serum replacer, 0.1 mM non-essential amino acids, 1 mM L-glutamine, 0.1 mM b-mercaptoethanol, and 4 ng/mL bFGF. Colonies were grown on mouse embryonic fibroblasts (MEFs) and split mechanically approximately every 7 days.

### ChIP qPCR

ChIP qPCR was performed using Millipore EZ-Magna ChIP G – Chromatin Immunoprecipitation Kit (17-409) following manufacturer's instructions. Briefly, 6-10 million cells were used for fixation. Sonication took place in 0.5 mL of nuclear lysis buffer. 4 µl of ChIPAb+ CTCF (17-10044) antibody was added to 50 µl of sonicated DNA aliquot with 450 µl ChIP dilution buffer for immunoprecipitation overnight. The washed immune-DNA complexes were reverse-crosslinked in 100 µl ChIP Elution buffer followed by removal of magnetic beads. Instead of using provided column for DNA purification, the process was carried out using phenol-chloroform. 200 µl of nuclease-free water and 200 µl of phenol-chloroform were added to the 100 µl reverse-crosslinked ChIP Elution buffer. After centrifugation, aqueous phase was transferred to a new tube. 200 µl of

chloroform was added for extra step of purification. The aqueous phase was transferred to a new tube and the precipitation took place at -20 °C for 30 minutes after adding 1 mL of 100% ethanol, 4 µg of glycogen, and 1/10 of total volume of 5M NaCl. Centrifuged DNA pellet was washed with 75% ethanol. The dry DNA pellet was reconstituted with 50 µl of nuclease-free water. The DNA was further diluted between 1:2 to 1:5 ratio for qPCR. 5 µl of diluted DNA was added to a total 20 µl reaction using SYBR green PCR master mix from Thermo Fisher Scientific (4309155). qPCR primers are list in Suppl. Table 1.

#### ChIP-seq

ChIP material was obtained following the same process in ChIP qPCR. Library preparation and sequencing runs were performed at the Genomics Core of the Yale Stem Cell Center. FASTQ files were mapped to the human genome (hg19) as described previously (2, 3). Normalized signals and CTCF peaks were identified in individual replicates using the ENCODE3 ChIP-Seq pipeline (<https://www.encodeproject.org/pipelines/ENCPL138KID/>). Differential CTCF binding between AS and PWS iPSCs was determined using DiffBind (Ross-Innes et al Nature 2012) (Table S1).

#### CRISPR and single-stranded oligonucleotide (ssODN) design

CRISPR gRNA sequences were designed using CRISPR Genome Engineering Resource (<http://crispr.mit.edu>)(4). The gRNA sequence was cloned in px459 V2

vector following the published protocol(5, 6). ssODNs were designed following the previously described protocol(7). The sequence of CRISPRs and ssODNs used in this paper are listed in Suppl. Table 2.

#### Generation of genome-manipulated AS iPSC clones

6-10 million AS iPSCs were treated with 10  $\mu$ M ROCKi (Calbiochem; Y-27632)(8) 24 hours prior to electroporation. iPSCs were dissociated into single cells by treatment with Accutase for 30 minutes. The cells were resuspended in 800  $\mu$ l of cold PBS. 10  $\mu$ g of each of two CRISPRs flanking the deletion/inversion region were added to the mixture. Electroporation took place using BioRad Gene Pulser Xcell with the following conditions: 250 V, 500  $\mu$ F, 0.4 cm cuvettes. In the case of LoxP insertion, 2 ssODNs were also added along with 2 CRISPRs.

Electroporated cells were transferred to a 15 conical tubes and centrifuged at 1000 rpm for 3 minutes to remove debris. Cells were then resuspended in hESC media and seeded on DR4 MEFs. For the first 24 hours, ROCKi was added to the hESC medium to increase cell survival. For the second 24 hours, ROCKi along with 1  $\mu$ g/ml puromycin were added for positive selection. For the third 24 hours, only puromycin was added to the medium. Regular hESC medium was changed everyday until visible colonies were formed. The total process took about 2 weeks after electroporation. Individual colonies were picked and screened using primer pairs to detect for deletion or inversion. Primers were designed as described<sup>9</sup> and listed in Suppl. Table 3 . To generate the 24kb

deletion iPSCs, LoxP-positive iPSCs were electroporated with 5ug of Cre-IRES-PuroR (Addgene #30205). Cells were selected with puromycin at 24 hours for a total of 48 hours. After the 48 hours of selection regular media was changed daily until colonies were isolated. Recombination of LoxP sites and deletion of the 24kb region was confirmed in the resulting clones by PCR.

#### 4C-seq

For 4C-seq, nuclei were harvested as described previously(2). Briefly, approximately 2 million of iPSCs and iPSC-derived neurons were fixed in formaldehyde (1% final) and quenched in glycine (150 mM final) at room temperature on a shaker for 10 and 5 minutes, respectively. Cells were harvested and centrifuged for 5 minutes at 2000 g at 4 °C. Cell pellets were lysed in 1 mL of cell lysis buffer containing proteinase inhibitor cocktail 3 (Calbiochem) on ice for 20 minutes prior to dounce homogenization with pestle A for 10 strokes and pestle B for 30 strokes. The nuclei were collected at 2000 g, 4 °C for 5 minutes, washed and resuspended in 500 µl of 1x restriction enzyme buffer (NEB Cutsmart). The following circularized chromatin conformation capture (4C) material preparation procedure was adapted from previously described protocols(9). The nuclei in NEB Cutsmart buffer was incubated at 65 °C for 10 minutes on a thermal mixer with 800 rpm after adding 15 µl of 10% SDS. 150 µl of 10% Triton X-100 was added and incubated at 37 °C for 10 minutes on a nutator. 200 units of NlaIII (NEB) and 16.5 uL 10x NEB Cutsmart

were added for the first digestion at 37 °C overnight on a nutator. An additional 50 units of NlaIII was used for an additional 2 hours to ensure complete digestion. NlaIII was heat inactivated prior to splitting into 3 ligation reactions. Each of the ligation solutions were prepared on ice with the following components: 220 µl heat inactivated digested material, 745 µl of 10X T4 Ligase buffer, 745 µl 10% Triton X-100, 800 µl BSA, 5.5 mL nuclease-free water, and 2000 units of NEB T4 DNA ligase. Prepared ligation solutions were incubated at 15 °C overnight. 15 µl of 20 mg/ml proteinase K (NEB) was added to the ligation solution, and incubated at 65 °C overnight to reverse the crosslinking. Reverse-crosslinked 3C material was purified using phenol-chloroform followed by chloroform prior to ethanol precipitation at -80 °C overnight. The 4C library was pelleted, air-dried, and resuspended in 10 mM Tris-HCl (pH 8.0). The second digestion was performed at 37 °C overnight with components listed in the followings: 445 µl of 3C library, 50 µl of 10X DpnII buffer, 150 units of DpnII. After digestion, DpnII was inactivated at 65 °C for 25 minutes. The following components were added to the heat-inactivated material for second ligation at 15 °C for 4 hours: 1.4 mL 10X T4 ligase buffer, 12.6 mL cold nuclease-free water, 6000 units of NEB T4 ligase. The 4C material was ethanol precipitated and column purified using Zymo Research DNA concentrator kit. 150 µl 10 mM Tris-HCL (pH 8.0) was used to elute 4C material.

4C viewpoint primers were selected from human NlaIII - DpnII primer pair database provided by Tayan's group

([http://compgenomics.weizmann.ac.il/tanay/?page\\_id=367](http://compgenomics.weizmann.ac.il/tanay/?page_id=367)) with minor modifications. Primer pair sequences and illumina adapters are listed in Suppl. Table 4. Sequential PCR was performed to construct 4C library using Expand Long Template Polymerase (Roche). Genomic primer pairs of 4C viewpoints were used for the first PCR, and the products were purified by Zymo Research DNA concentrator kit. The purified PCR products were eluted in 10 mM Tris (pH 8.0) as the template for the second PCR. Illumina barcoded adapters were used as primers for the second PCR, and the barcoded 4C library were purified by Zymo Research DNA concentrator kit. Both first and second PCR reactions were done in 8 replicates. 2 nM 4C library from each sample was pooled together before loading on the Illumina NextSeq 500. All samples were done in replicates.

Reads were first de-multiplexed to separate samples and trimmed to remove Illumina adapters using cutadapt. Reads within each sample were then separated according to the genomic sequences and trimmed using cutadapt. Each viewpoint from each sample was mapped to hg19 reference genome using Bowtie 2. The generated bam files were plugged into R package (r3Cseq) to analyze chromatin interactions of each viewpoint(10).

#### RNA isolation and qRT-PCR

RNA was isolated using RNABee (AMSBIO, LLC) following the manufacturer's instructions. 1 µg of RNA was used for reverse transcription using BioRad iScript Advanced cDNA Synthesis Kit. 30 ng of cDNA was loaded in a 20 µl qPCR

reaction. qPCR was performed using BioRad CFX Touch Real-Time PCR Detection System. Relative expression was calculated using the delta delta Ct method.

### Neural differentiation

iPSC-derived 10 wk neurons were differentiated using a monolayer protocol as described(11). Briefly, 2-day post-split iPSCs were switched to N2B27 medium supplemented with 500 ng/mL Noggin (R&D Systems) for 14 days with a complete change of medium every other day. Colonies were split on to poly-ornithine and laminin-coated plates with 1:2 ratio using StemPro EZ Passage tool (Life Technologies) for another week with a complete change of medium every other day. These cells were trypsinized and replated to poly-ornithine and laminin-coated plates and supplemented with ROCKi overnight. Cells were kept in N2B27 for a few more days before switching to neural differentiation medium for a week. For terminal differentiation, neurons were plated at a density of 200,000 cells per well of a 6 well plate. Terminally differentiated neurons were kept in neuron differentiation medium for another 5 weeks to obtain mature neurons.

### PRO-seq

PRO-seq was carried out as described(12-14) with the following modifications. iPSCs grown on 10cm dishes were washed twice with cold PBS, scraped, and pelleted. Pellets were resuspended in ice-cold permeabilization buffer, pulsed

with a dounce homogenizer, and incubated on ice for 5 minutes. Permeabilization was confirmed by trypan blue staining. Permeabilized cells were counted and flash frozen in aliquots of  $1 \times 10^6$  each.

### **PRO-seq library production**

PRO-seq libraries from ~1 million permeabilized cells were constructed as in Mahat et. al. (15), with the following modifications. After the run-on reaction, RNAs were extracted with RNA purification columns (Norgen, product #37500). After the 3'-ligation, the cap-removal, end repair, 5'-ligation, and reverse transcription reactions were all performed on the beads by doubling of reaction volumes. cDNA was eluted from the beads by brief heating to 95°C. A second elution was performed with water, and samples were pre-amplified 5 cycles before storing. Cycling parameters as as in Mahat et. al. Test amplifications of serial dilutions from each pre-amplification were used to determine the number of cycles for full amplification, with a maximum of 15 cycles. Fully amplified libraries were PAGE purified on a 8% PAGE gel, quantified and sized by Qbit and Agilent tapestation, respectively and sequenced on an Illumina NextSeq 500 (75 bp – high throughput kit) at the Center for Genome Innovation (Storrs, CT).

### **Mapping of PRO-seq data**

Adapter sequences were trimmed with FASTX-Toolkit and filtered for a minimum of 15 bases. All reads were then trimmed to a maximum of 36 bases and then



reverse complimented. Reads were first mapped with Bowtie (16) to a copy of the mouse rDNA repeat (GenBank: BK000964.1) with the -K1 option, and unaligned reads were then mapped to the mouse genome (mm10) filtering for unique matches. Only the final 3'-base representing position of the polymerase was reported to output files used in all analyses.

1. Chamberlain SJ, *et al.* (2010) Induced pluripotent stem cell models of the genomic imprinting disorders Angelman and Prader-Willi syndromes. *Proc Natl Acad Sci U S A* 107(41):17668-17673.
2. Cotney JL & Noonan JP (2015) Chromatin immunoprecipitation with fixed animal tissues and preparation for high-throughput sequencing. *Cold Spring Harb Protoc* 2015(4):419.
3. Cotney J, *et al.* (2015) The autism-associated chromatin modifier CHD8 regulates other autism risk genes during human neurodevelopment. *Nat Commun* 6:6404.
4. Hsu PD, *et al.* (2013) DNA targeting specificity of RNA-guided Cas9 nucleases. *Nat Biotechnol* 31(9):827-832.
5. Cong L, *et al.* (2013) Multiplex genome engineering using CRISPR/Cas systems. *Science* 339(6121):819-823.
6. Ran FA, *et al.* (2013) Genome engineering using the CRISPR-Cas9 system. *Nature protocols* 8(11):2281-2308.
7. Yang H, *et al.* (2013) One-step generation of mice carrying reporter and conditional alleles by CRISPR/Cas-mediated genome engineering. *Cell* 154(6):1370-1379.
8. Watanabe K, *et al.* (2007) A ROCK inhibitor permits survival of dissociated human embryonic stem cells. *Nat Biotechnol* 25(6):681-686.
9. van de Werken HJ, *et al.* (2012) Robust 4C-seq data analysis to screen for regulatory DNA interactions. *Nat Methods* 9(10):969-972.
10. Thongjuea S, Stadhouders R, Grosveld FG, Soler E, & Lenhard B (2013) r3Cseq: an R/Bioconductor package for the discovery of long-range genomic interactions from chromosome conformation capture and next-generation sequencing data. *Nucleic Acids Res* 41(13):e132.
11. Germain ND CP, Plocik AM, Glatt-Deeley H, Brown J, Fink JJ, Bolduc KA, Robinson TM, Levine ES, Reiter LT, Graveley BR, Lalande M, Chamberlain SJ. (2014) Gene expression analysis of human induced pluripotent stem cell-derived neurons carrying copy number variants of chromosome 15q11-q13.1. *Mol Autism* 5(44).
12. Mahat DB, *et al.* (2016) Base-pair-resolution genome-wide mapping of active RNA polymerases using precision nuclear run-on (PRO-seq). *Nature protocols* 11(8):1455-1476.
13. Kwak H, Fuda NJ, Core LJ, & Lis JT (2013) Precise maps of RNA polymerase reveal how promoters direct initiation and pausing. *Science* 339(6122):950-953.
14. Core LJ, Waterfall JJ, & Lis JT (2008) Nascent RNA sequencing reveals widespread pausing and divergent initiation at human promoters. *Science* 322(5909):1845-1848.
15. Mahat DB, Kwak H, Booth GT, Jonkers IH, Danko CG, Patel RK, Waters CT, Munson K, Core LJ, Lis JT: Base-pair-resolution genome-wide mapping of active RNA polymerases using precision nuclear run-on (PRO-seq). *Nat Protoc* 2016, 11(8);1455-1476.

16. Langmead B, Trapnell C, Pop M, Salzberg SL: Ultrafast and memory-efficient alignment of short DNA sequences to the human genome. *Genome Biol* 2009, 10(3);R25-2009-10-3-r25. Epub 2009 Mar 4.

## Supplemental Figure Legends

**Suppl. Fig. 1. CTCF is enriched on the paternal allele of *PWAR1*.** ChIP-seq for CTCF was performed in AS and PWS iPSCs harboring deletion of the 15q11-q13 region on the maternal and paternal alleles, respectively. CTCF binding on the paternal allele (blue) and maternal allele (red) are shown in A. The imprinted region is designated. Asterisks mark the CTCF sites used as anchors for 4C-seq. Black bars indicate significant differentially bound CTCF sites based on ChIP-Seq data. ChIP-qPCR was used to quantify CTCF enrichment on the paternal and maternal alleles in AS and PWS iPSCs, respectively, in B. ChIP-qPCR was used to quantify CTCF enrichment at *PWAR1* and *SNORD116* sites (C) and at sites upstream of *SNRPN* and upstream of *UBE3A* (D) during a time course of neural differentiation of AS iPSCs.

**Suppl. Fig. 2. RNAPII is stalled at *PWAR1* and at the first exon of *SNORD115* in AS iPSCs.** PRO-seq was used to map RNAPII density in AS,  $\Delta I$ ,  $\Delta I$ -P, and  $\Delta S$ -115 iPSCs. Plus strand RNAPII density is shown in red. Minus strand RNAPII density is shown in blue. Absent signals in  $\Delta I$ ,  $\Delta I$ -P, and  $\Delta S$ -115 iPSC lanes reflect engineered deletions.

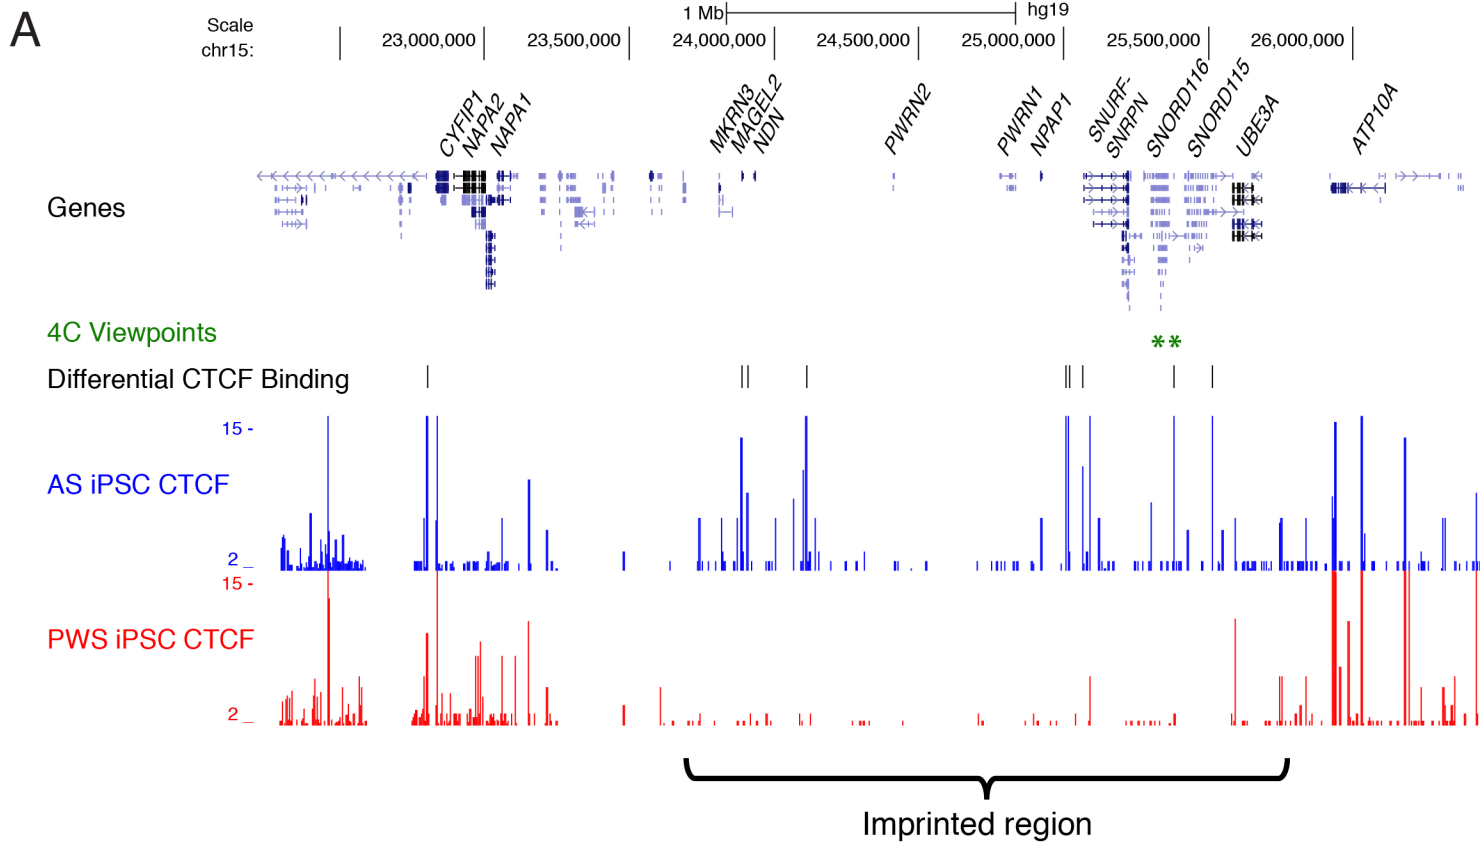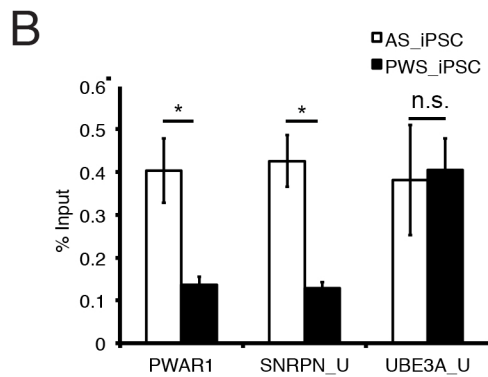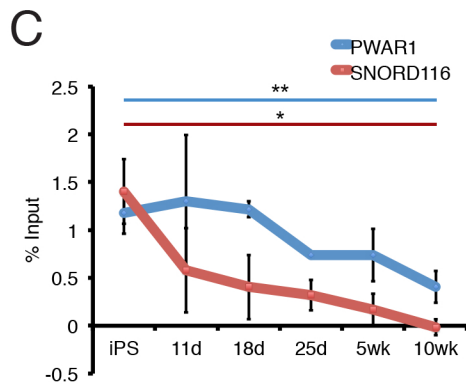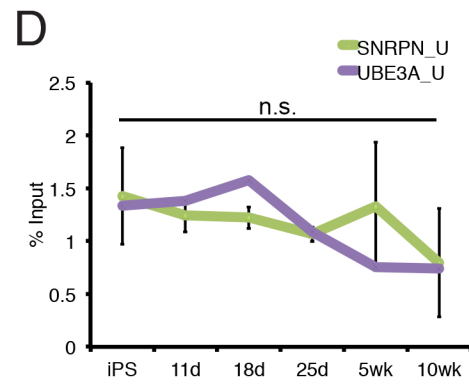

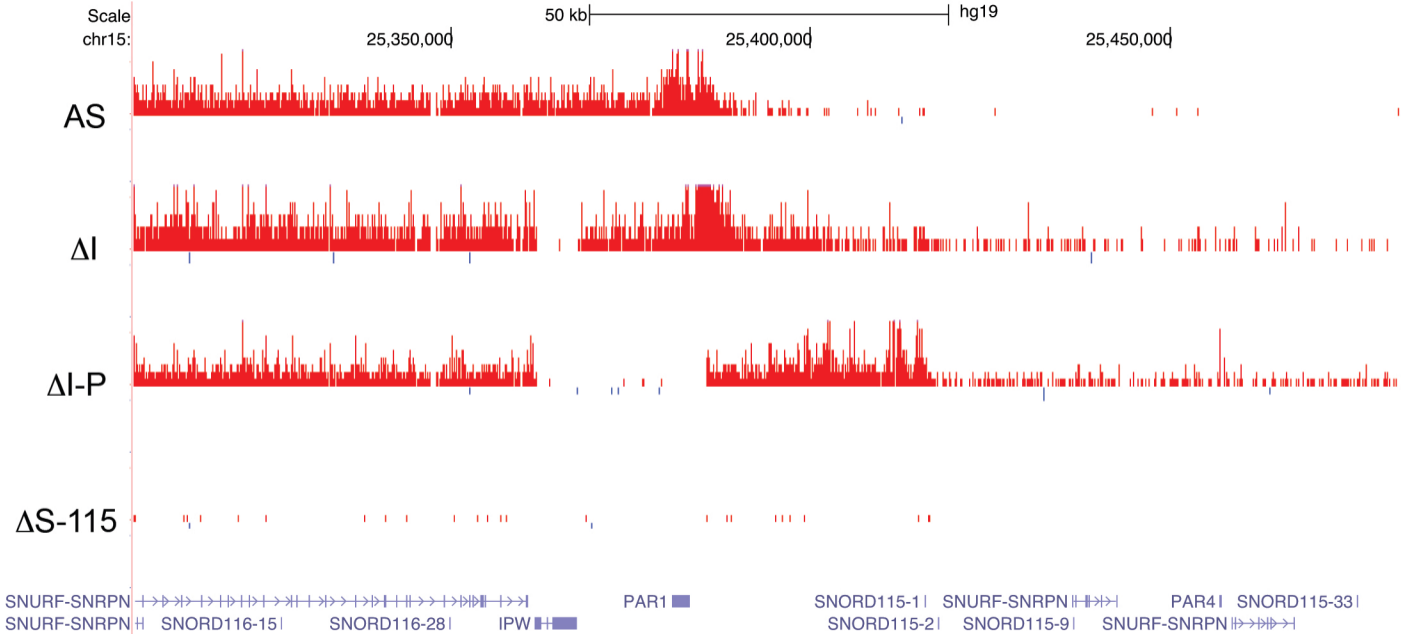

**Table S1. ChIP-qPCR primers**

| Primer name  | sequence               |
|--------------|------------------------|
| SNRPN_U_F    | GGTCTCTCAGTTGGCTCCTG   |
| SNRPN_U_R    | ATGGTGGATACTTGGCTTGG   |
| PAR1_F       | CAGGGAACGCTCTTCAACAT   |
| PAR1_R       | AACCAGTTCCAAACCTGACG   |
| UBE3A_U_F    | TGCTTCTGAACCCTGAATCC   |
| UBE3A_U_R    | CATGGACAAGTGTGTGTTGCT  |
| SNRPN_exon_F | ATCTGTCTGAGGAGCGGTCAGT |
| SNRPN_exon_R | TCCCCAGGCTGTCTCTTGAG   |
| SNORD116_F   | GTTGGTGTTCCTAGCATCC    |
| SNORD116_R   | CCTTGCAGGTCTTGAAATC    |
| PAR1_mi_F    | CAGGGAAGGGAGTTTGTG     |
| PAR1_mi_R    | CGTGGGATTGTTTGATAGTGTG |

**Table S2. CRISPR guide RNA sequences for genome engineering**

| CRISPR name    | sequence                |
|----------------|-------------------------|
| IPW 5' #1      | TATACAGAGCAATACGATCATGG |
| IPW 5' #2      | GGAAAGGTTGGATTAAACTAAGG |
| IPW 5' #4      | TCTAAGAATTCCACTGGTGAAGG |
| IPW 3'         | AACTAGCACATACAAGGAACTGG |
| PAR1 5'        | GTTCTGAAGCAAGGTATACCTGG |
| PAR1 3'        | ATATAACCAAATTGTCCGTTAGG |
| SNRPN_intron 1 | CAAGAACCTGGCATATACGAGGG |
| SNORD115-45    | GACTCCATAGATTAACCCCTGG  |



**Suppl. Table 4. Differentially bound CTCF sites in AS versus PWS iPSCs**

| seqnames | start     | end       | width | strand | Conc | Conc_AS |
|----------|-----------|-----------|-------|--------|------|---------|
| chr12    | 130516093 | 130516527 | 435   | *      | 5.28 | 6.07    |
| chr16    | 6197051   | 6197452   | 402   | *      | 4.24 | 5.22    |
| chr16    | 6732153   | 6732787   | 635   | *      | 4.5  | 5.39    |
| chr6     | 57445299  | 57445881  | 583   | *      | 4.21 | 5.14    |
| chr10    | 109964112 | 109964501 | 390   | *      | 4.1  | 5.02    |
| chr16    | 5968813   | 5969124   | 312   | *      | 3.82 | 4.79    |
| chr16    | 76299384  | 76299720  | 337   | *      | 3.76 | 4.73    |
| chr16    | 84208896  | 84209269  | 374   | *      | 3.73 | 4.7     |
| chr12    | 130399158 | 130399511 | 354   | *      | 3.7  | 4.67    |
| chr8     | 35998776  | 35999110  | 335   | *      | 3.92 | 4.83    |
| chr2     | 22578691  | 22579084  | 394   | *      | 3.65 | 4.6     |
| chr10    | 132484943 | 132485347 | 405   | *      | 3.63 | 4.6     |
| chr12    | 130510916 | 130511600 | 685   | *      | 3.64 | 4.61    |
| chr10    | 108471045 | 108471498 | 454   | *      | 3.69 | 4.66    |
| chr17    | 44290281  | 44290650  | 370   | *      | 5.39 | 6.11    |
| chr6     | 86632708  | 86633170  | 463   | *      | 4.24 | 5.12    |
| chr10    | 108623352 | 108623607 | 256   | *      | 3.54 | 4.5     |
| chr15    | 25017465  | 25017772  | 308   | *      | 3.54 | 4.5     |
| chr2     | 21977072  | 21977444  | 373   | *      | 3.47 | 4.43    |
| chr4     | 9167788   | 9168086   | 299   | *      | 3.44 | 4.4     |
| chr12    | 129637158 | 129637765 | 608   | *      | 3.48 | 4.43    |
| chr10    | 107935227 | 107935930 | 704   | *      | 3.43 | 4.39    |
| chr12    | 127839688 | 127839974 | 287   | *      | 3.54 | 4.47    |
| chr12    | 127189162 | 127189494 | 333   | *      | 3.36 | 4.32    |
| chr15    | 25513278  | 25513641  | 364   | *      | 3.36 | 4.32    |
| chr12    | 129098390 | 129098661 | 272   | *      | 3.36 | 4.32    |
| chr10    | 47080906  | 47081326  | 421   | *      | 6.25 | 6.9     |
| chr16    | 75729564  | 75729986  | 423   | *      | 3.31 | 4.27    |
| chr7     | 23584392  | 23584959  | 568   | *      | 3.38 | 4.34    |
| chrX     | 155196469 | 155197058 | 590   | *      | 3.43 | 4.36    |
| chr22    | 48172091  | 48172389  | 299   | *      | 3.48 | 4.44    |
| chr2     | 21644905  | 21645259  | 355   | *      | 3.56 | 4.47    |
| chr12    | 128195772 | 128196087 | 316   | *      | 3.57 | 4.48    |
| chr15    | 53879062  | 53879389  | 328   | *      | 3.39 | 4.32    |
| chr16    | 5806999   | 5807295   | 297   | *      | 3.27 | 4.22    |
| chr8     | 140418019 | 140418598 | 580   | *      | 4.25 | 5.07    |
| chr10    | 108555360 | 108555692 | 333   | *      | 3.27 | 4.21    |
| chr8     | 140260371 | 140260656 | 286   | *      | 3.24 | 4.19    |
| chr10    | 108465276 | 108465696 | 421   | *      | 4.02 | 4.89    |
| chr12    | 128410544 | 128410865 | 322   | *      | 3.2  | 4.15    |
| chr9     | 80744952  | 80745240  | 289   | *      | 3.21 | 4.16    |

|       |           |           |       |      |      |
|-------|-----------|-----------|-------|------|------|
| chr15 | 29888541  | 29888856  | 316 * | 3.16 | 4.11 |
| chr10 | 47004081  | 47004642  | 562 * | 5.66 | 6.31 |
| chr14 | 22470981  | 22471492  | 512 * | 4.34 | 1.94 |
| chr22 | 48233515  | 48233781  | 267 * | 3.1  | 4.05 |
| chr7  | 153078622 | 153079086 | 465 * | 3.15 | 4.09 |
| chr12 | 128258071 | 128258499 | 429 * | 3.28 | 4.2  |
| chr12 | 126847601 | 126847895 | 295 * | 3.09 | 4.03 |
| chr7  | 154581142 | 154581392 | 251 * | 3.11 | 4.06 |
| chr12 | 127101848 | 127102241 | 394 * | 3.62 | 4.51 |
| chr2  | 22597955  | 22598363  | 409 * | 3.3  | 4.25 |
| chr8  | 126970056 | 126970416 | 361 * | 3.32 | 4.22 |
| chr6  | 64017815  | 64018215  | 401 * | 3.08 | 4.02 |
| chr10 | 133040361 | 133040618 | 258 * | 3.1  | 4.04 |
| chr10 | 109871941 | 109872388 | 448 * | 3.65 | 4.53 |
| chr10 | 108331266 | 108331702 | 437 * | 3.75 | 4.62 |
| chr12 | 128744059 | 128744438 | 380 * | 3.04 | 3.99 |
| chr4  | 155040480 | 155040939 | 460 * | 3.04 | 3.99 |
| chr20 | 40200732  | 40201016  | 285 * | 2.99 | 3.93 |
| chr7  | 154376413 | 154376701 | 289 * | 2.99 | 3.93 |
| chr12 | 128378448 | 128378722 | 275 * | 3.05 | 3.99 |
| chr16 | 6395130   | 6395425   | 296 * | 2.95 | 3.89 |
| chr8  | 139126591 | 139126984 | 394 * | 3.42 | 4.32 |
| chr10 | 109574630 | 109574876 | 247 * | 2.99 | 3.94 |
| chr10 | 107734510 | 107734896 | 387 * | 2.93 | 3.87 |
| chr12 | 129671571 | 129671807 | 237 * | 2.94 | 3.88 |
| chr3  | 950567    | 950927    | 361 * | 2.9  | 3.83 |
| chr16 | 88371784  | 88372180  | 397 * | 3.92 | 0.63 |
| chr12 | 126832052 | 126832289 | 238 * | 2.88 | 3.82 |
| chr17 | 49613184  | 49613568  | 385 * | 2.87 | 3.81 |
| chr7  | 21536799  | 21537103  | 305 * | 2.87 | 3.81 |
| chr6  | 57689903  | 57690229  | 327 * | 2.86 | 3.79 |
| chr12 | 127268817 | 127269229 | 413 * | 3.12 | 4.02 |
| chr8  | 35684945  | 35685287  | 343 * | 3.02 | 3.97 |
| chr17 | 13841927  | 13842220  | 294 * | 2.95 | 3.87 |
| chr12 | 127147818 | 127148185 | 368 * | 3.73 | 4.56 |
| chr10 | 46983358  | 46984129  | 772 * | 7.38 | 7.97 |
| chr6  | 80113934  | 80114386  | 453 * | 2.83 | 3.76 |
| chr12 | 129328826 | 129329107 | 282 * | 2.83 | 3.76 |
| chr17 | 65471529  | 65471911  | 383 * | 3.92 | 1.34 |
| chr6  | 87566524  | 87567056  | 533 * | 3.85 | 4.68 |
| chr11 | 21535668  | 21536164  | 497 * | 3.73 | 4.57 |
| chr8  | 41692138  | 41692607  | 470 * | 4.58 | 2.93 |
| chr4  | 187071181 | 187071413 | 233 * | 2.85 | 3.79 |

|       |           |           |       |      |      |
|-------|-----------|-----------|-------|------|------|
| chr9  | 106160184 | 106160613 | 430 * | 2.77 | 3.7  |
| chr12 | 127778026 | 127778402 | 377 * | 2.95 | 3.85 |
| chr1  | 4654435   | 4654679   | 245 * | 2.74 | 3.67 |
| chr5  | 33470761  | 33470960  | 200 * | 2.74 | 3.67 |
| chr22 | 20918549  | 20919024  | 476 * | 5.39 | 4.25 |
| chr8  | 139490998 | 139491313 | 316 * | 3.26 | 4.14 |
| chr22 | 49059178  | 49059589  | 412 * | 2.79 | 3.72 |
| chr4  | 118927035 | 118927504 | 470 * | 3.55 | 4.44 |
| chr8  | 139926663 | 139927006 | 344 * | 3.01 | 3.95 |
| chr21 | 31781283  | 31781480  | 198 * | 3.11 | 4    |
| chr16 | 5683872   | 5684177   | 306 * | 3.28 | 4.17 |
| chr12 | 129460660 | 129460948 | 289 * | 2.71 | 3.64 |
| chr3  | 119139104 | 119139370 | 267 * | 2.71 | 3.64 |
| chr15 | 25006852  | 25007216  | 365 * | 2.69 | 3.62 |
| chr16 | 6410650   | 6410973   | 324 * | 2.8  | 3.74 |
| chr8  | 118874316 | 118874658 | 343 * | 4.45 | 5.22 |
| chr8  | 35913482  | 35913813  | 332 * | 2.9  | 3.79 |
| chr22 | 35567398  | 35567647  | 250 * | 2.84 | 3.77 |
| chr12 | 130770637 | 130770915 | 279 * | 2.79 | 3.73 |
| chr10 | 104374977 | 104375431 | 455 * | 3.73 | 0.63 |
| chr10 | 108770952 | 108771189 | 238 * | 2.75 | 3.68 |
| chr8  | 138859331 | 138859584 | 254 * | 2.68 | 3.6  |
| chr8  | 35744543  | 35745004  | 462 * | 3.07 | 3.96 |
| chr17 | 41400262  | 41400646  | 385 * | 3.69 | 0.63 |
| chr19 | 21651587  | 21651957  | 371 * | 3.69 | 0.63 |
| chr10 | 108369670 | 108369993 | 324 * | 2.7  | 3.63 |
| chr16 | 6464714   | 6464951   | 238 * | 2.7  | 3.63 |
| chr10 | 135422224 | 135422852 | 629 * | 3.22 | 4.1  |
| chr12 | 129015719 | 129016019 | 301 * | 2.66 | 3.58 |
| chr12 | 128044277 | 128044653 | 377 * | 2.65 | 3.57 |
| chr8  | 138946742 | 138946967 | 226 * | 2.65 | 3.57 |
| chr1  | 205641216 | 205641609 | 394 * | 3.66 | 0.63 |
| chr8  | 36634102  | 36634380  | 279 * | 2.76 | 3.67 |
| chr15 | 45866256  | 45866483  | 228 * | 3.57 | 4.4  |
| chr8  | 34748717  | 34749031  | 315 * | 3.09 | 3.96 |
| chr8  | 139712645 | 139712949 | 305 * | 3.6  | 4.43 |
| chr12 | 129675466 | 129675726 | 261 * | 2.63 | 3.55 |
| chr13 | 108739134 | 108739347 | 214 * | 2.63 | 3.55 |
| chr2  | 21638191  | 21638543  | 353 * | 2.63 | 3.55 |
| chr7  | 153769012 | 153769312 | 301 * | 2.63 | 3.55 |
| chr8  | 140353141 | 140353416 | 276 * | 2.63 | 3.55 |
| chr22 | 24326700  | 24326980  | 281 * | 2.66 | 3.59 |
| chr11 | 47395376  | 47395839  | 464 * | 3.74 | 0.63 |

|       |           |           |       |      |      |
|-------|-----------|-----------|-------|------|------|
| chr16 | 76702322  | 76702562  | 241 * | 2.61 | 3.53 |
| chr2  | 44271287  | 44271737  | 451 * | 4.01 | 1.7  |
| chr10 | 61435619  | 61435939  | 321 * | 3.28 | 4.13 |
| chr12 | 127593157 | 127593504 | 348 * | 2.69 | 3.62 |
| chr10 | 132139605 | 132139933 | 329 * | 2.68 | 3.61 |
| chr19 | 47082902  | 47083333  | 432 * | 2.94 | 3.84 |
| chrX  | 25987224  | 25987483  | 260 * | 2.82 | 3.76 |
| chr3  | 55475355  | 55475891  | 537 * | 2.76 | 3.69 |
| chr16 | 78512420  | 78512682  | 263 * | 4.15 | 4.89 |
| chr3  | 2806635   | 2807010   | 376 * | 2.58 | 3.5  |
| chr5  | 71542099  | 71542399  | 301 * | 2.58 | 3.5  |
| chr7  | 152810238 | 152810665 | 428 * | 3.35 | 4.21 |
| chr7  | 145794245 | 145794483 | 239 * | 2.56 | 3.48 |
| chr16 | 6066447   | 6066867   | 421 * | 2.9  | 3.81 |
| chr6  | 10954789  | 10955169  | 381 * | 4.34 | 2.73 |
| chr11 | 132009956 | 132010399 | 444 * | 2.62 | 3.54 |
| chr17 | 13602214  | 13602504  | 291 * | 2.83 | 3.72 |
| chr8  | 35715380  | 35715671  | 292 * | 3.33 | 4.19 |
| chr12 | 127618615 | 127618841 | 227 * | 2.54 | 3.46 |
| chr16 | 6131282   | 6131669   | 388 * | 3.8  | 4.63 |
| chr20 | 53596946  | 53597196  | 251 * | 2.67 | 3.57 |
| chr10 | 71645098  | 71645335  | 238 * | 2.68 | 3.58 |
| chr8  | 140035343 | 140035706 | 364 * | 3.51 | 4.36 |
| chr2  | 21595533  | 21595857  | 325 * | 3.21 | 4.07 |
| chr12 | 111332090 | 111332509 | 420 * | 3.55 | 0.63 |
| chr6  | 64632963  | 64633356  | 394 * | 2.67 | 3.6  |
| chr18 | 36125010  | 36125377  | 368 * | 4.13 | 4.87 |
| chr8  | 139711085 | 139711429 | 345 * | 3.4  | 4.27 |
| chr1  | 47995131  | 47995637  | 507 * | 3.13 | 3.99 |
| chr15 | 24112014  | 24112277  | 264 * | 2.51 | 3.43 |
| chr2  | 91814900  | 91815856  | 957 * | 5.12 | 3.86 |
| chr1  | 55755407  | 55755706  | 300 * | 2.57 | 3.5  |
| chr12 | 127459405 | 127459722 | 318 * | 2.57 | 3.5  |
| chr10 | 108160868 | 108161281 | 414 * | 3.25 | 4.08 |
| chr5  | 132623165 | 132623522 | 358 * | 3.54 | 0.63 |
| chr15 | 25381336  | 25381557  | 222 * | 2.55 | 3.47 |
| chrX  | 53076410  | 53076926  | 517 * | 2.55 | 3.47 |
| chr9  | 89612107  | 89612493  | 387 * | 3.52 | 0.63 |
| chr1  | 226591169 | 226591466 | 298 * | 3.04 | 3.91 |
| chr22 | 36617805  | 36618313  | 509 * | 3.51 | 0.63 |
| chr6  | 126573372 | 126573966 | 595 * | 3.03 | 3.9  |
| chr11 | 84658250  | 84658501  | 252 * | 2.82 | 3.69 |
| chr6  | 87739486  | 87739803  | 318 * | 3.69 | 4.5  |

|       |           |           |       |      |      |
|-------|-----------|-----------|-------|------|------|
| chr4  | 133739343 | 133739751 | 409 * | 3.5  | 0.63 |
| chr8  | 4695397   | 4695640   | 244 * | 2.96 | 3.84 |
| chr2  | 33780103  | 33780362  | 260 * | 2.71 | 3.58 |
| chr8  | 117863438 | 117863727 | 290 * | 2.74 | 3.62 |
| chr4  | 154949904 | 154950245 | 342 * | 2.47 | 3.38 |
| chr2  | 169231691 | 169231994 | 304 * | 2.59 | 3.48 |
| chr3  | 3237840   | 3238321   | 482 * | 4.14 | 4.91 |
| chr12 | 127847917 | 127848426 | 510 * | 2.45 | 3.37 |
| chr16 | 76191601  | 76191816  | 216 * | 2.45 | 3.37 |
| chrX  | 25739782  | 25740013  | 232 * | 2.45 | 3.37 |
| chr19 | 28464918  | 28465324  | 407 * | 3.48 | 0.63 |
| chr6  | 87646840  | 87647091  | 252 * | 2.81 | 3.74 |
| chr12 | 130886210 | 130886468 | 259 * | 2.43 | 3.35 |
| chr6  | 62421868  | 62422105  | 238 * | 2.43 | 3.35 |
| chr1  | 19988204  | 19988693  | 490 * | 4.18 | 4.92 |
| chr7  | 14344931  | 14345229  | 299 * | 2.47 | 3.39 |
| chr10 | 132134954 | 132135273 | 320 * | 2.66 | 3.53 |
| chr11 | 68495368  | 68495618  | 251 * | 2.57 | 3.46 |
| chr8  | 101678380 | 101678702 | 323 * | 2.57 | 3.46 |
| chr8  | 73199205  | 73199778  | 574 * | 2.9  | 3.75 |
| chr12 | 50469008  | 50469307  | 300 * | 3.45 | 0.63 |
| chr17 | 26881572  | 26881872  | 301 * | 2.41 | 3.33 |
| chr8  | 140418913 | 140419189 | 277 * | 2.41 | 3.33 |
| chr1  | 29529400  | 29529684  | 285 * | 3.44 | 0.63 |
| chr16 | 8405747   | 8406018   | 272 * | 3.51 | 4.34 |
| chr3  | 13503032  | 13503447  | 416 * | 4.4  | 2.93 |
| chr14 | 69291590  | 69292018  | 429 * | 3.87 | 1.81 |
| chr10 | 107451650 | 107451890 | 241 * | 2.45 | 3.36 |
| chr12 | 126373130 | 126373334 | 205 * | 2.45 | 3.36 |
| chr8  | 138505140 | 138505382 | 243 * | 2.69 | 3.57 |
| chr2  | 133408705 | 133408987 | 283 * | 2.55 | 3.45 |
| chr3  | 14832781  | 14833198  | 418 * | 3.64 | 1.34 |
| chrX  | 37161893  | 37162295  | 403 * | 3.41 | 0.63 |
| chr13 | 82901181  | 82901729  | 549 * | 2.49 | 3.41 |
| chr20 | 53674359  | 53674702  | 344 * | 2.49 | 3.41 |
| chr10 | 48586161  | 48586412  | 252 * | 2.61 | 3.48 |
| chr8  | 36631132  | 36631501  | 370 * | 2.86 | 3.75 |
| chr6  | 43726224  | 43726563  | 340 * | 4.05 | 2.17 |
| chr16 | 6227831   | 6228066   | 236 * | 2.38 | 3.29 |
| chr2  | 20391168  | 20391399  | 232 * | 2.38 | 3.29 |
| chr2  | 22849567  | 22849862  | 296 * | 2.38 | 3.29 |
| chr18 | 2985741   | 2986122   | 382 * | 2.52 | 3.41 |
| chr8  | 58094753  | 58095054  | 302 * | 2.52 | 3.41 |

|       |           |           |       |      |      |
|-------|-----------|-----------|-------|------|------|
| chr1  | 19717885  | 19718316  | 432 * | 3.41 | 0.63 |
| chr20 | 1569782   | 1569990   | 209 * | 2.39 | 3.3  |
| chr12 | 125382945 | 125383382 | 438 * | 4.17 | 2.46 |
| chr3  | 90401365  | 90401934  | 570 * | 2.94 | 3.79 |
| chr8  | 97340064  | 97340745  | 682 * | 3.63 | 1.34 |
| chr12 | 129156142 | 129156431 | 290 * | 2.4  | 3.31 |
| chr3  | 56741540  | 56741786  | 247 * | 2.36 | 3.27 |
| chr19 | 47207615  | 47208196  | 582 * | 4.12 | 2.5  |
| chr3  | 22282678  | 22283031  | 354 * | 3.73 | 4.52 |
| chr12 | 129129328 | 129129613 | 286 * | 3.07 | 3.92 |
| chr8  | 108376383 | 108376711 | 329 * | 2.72 | 3.57 |
| chr2  | 17352820  | 17353098  | 279 * | 3.29 | 4.1  |
| chr16 | 5654763   | 5655060   | 298 * | 2.33 | 3.24 |
| chr5  | 22319888  | 22320229  | 342 * | 2.33 | 3.24 |
| chr6  | 4384985   | 4385387   | 403 * | 2.33 | 3.24 |
| chr12 | 130549624 | 130549916 | 293 * | 2.48 | 3.4  |
| chr17 | 32846356  | 32846650  | 295 * | 3.34 | 0.63 |
| chr16 | 76888137  | 76888535  | 399 * | 2.42 | 3.33 |
| chr4  | 179928890 | 179929263 | 374 * | 2.42 | 3.33 |
| chrX  | 82890294  | 82890624  | 331 * | 2.58 | 3.45 |
| chr10 | 107557067 | 107557284 | 218 * | 2.76 | 3.62 |
| chrX  | 34293885  | 34294280  | 396 * | 3.21 | 4.03 |
| chr10 | 106684969 | 106685418 | 450 * | 4.2  | 4.89 |
| chr2  | 50763472  | 50763864  | 393 * | 3.82 | 4.56 |
| chrX  | 146885549 | 146885981 | 433 * | 2.61 | 3.48 |
| chr13 | 107954036 | 107954444 | 409 * | 2.86 | 3.73 |
| chr14 | 69408241  | 69408829  | 589 * | 3.42 | 0.63 |
| chr5  | 141137061 | 141137275 | 215 * | 3.56 | 1.34 |
| chr19 | 38874979  | 38875774  | 796 * | 4.24 | 2.69 |
| chrX  | 17857305  | 17857852  | 548 * | 3.33 | 0.63 |
| chr10 | 49867913  | 49868135  | 223 * | 2.54 | 3.41 |
| chr12 | 65386519  | 65386824  | 306 * | 2.54 | 3.41 |
| chr7  | 157091181 | 157091638 | 458 * | 3.68 | 1.43 |
| chr12 | 56099567  | 56099996  | 430 * | 3.34 | 0.63 |
| chr11 | 90663447  | 90663761  | 315 * | 2.3  | 3.2  |
| chr14 | 75040093  | 75040448  | 356 * | 3.55 | 1.34 |
| chr7  | 24755522  | 24755779  | 258 * | 3.32 | 0.63 |
| chr12 | 117908466 | 117908979 | 514 * | 3.15 | 3.97 |
| chr15 | 40223914  | 40224186  | 273 * | 2.93 | 3.76 |
| chr19 | 15979886  | 15980128  | 243 * | 2.77 | 3.63 |
| chr20 | 44174620  | 44175080  | 461 * | 3    | 3.83 |
| chr8  | 27104828  | 27105262  | 435 * | 3.92 | 2.17 |
| chr5  | 58746101  | 58746430  | 330 * | 2.92 | 3.77 |

|       |           |           |       |      |      |
|-------|-----------|-----------|-------|------|------|
| chr8  | 138637938 | 138638220 | 283 * | 2.27 | 3.18 |
| chr1  | 14136317  | 14136637  | 321 * | 2.31 | 3.22 |
| chr10 | 109024517 | 109024729 | 213 * | 2.31 | 3.22 |
| chr12 | 128665310 | 128665569 | 260 * | 2.31 | 3.22 |
| chr2  | 21586299  | 21586625  | 327 * | 2.31 | 3.22 |
| chr20 | 49192441  | 49192714  | 274 * | 3.31 | 0.63 |
| chr15 | 55856546  | 55857020  | 475 * | 3.08 | 3.89 |
| chr10 | 106245439 | 106245720 | 282 * | 2.59 | 3.46 |
| chr6  | 86058445  | 86058649  | 205 * | 2.59 | 3.46 |
| chr2  | 30249298  | 30249787  | 490 * | 3.28 | 0.63 |
| chr2  | 64276713  | 64277284  | 572 * | 4.65 | 5.31 |
| chr1  | 96418563  | 96418915  | 353 * | 2.34 | 3.25 |
| chr16 | 5555076   | 5555426   | 351 * | 2.34 | 3.25 |
| chr7  | 129284503 | 129284740 | 238 * | 2.34 | 3.25 |
| chr20 | 58799940  | 58800334  | 395 * | 2.58 | 3.45 |
| chr4  | 308381    | 308772    | 392 * | 2.84 | 3.69 |
| chr3  | 10234519  | 10234889  | 371 * | 3.07 | 3.88 |
| chr14 | 36156321  | 36156850  | 530 * | 4.07 | 4.78 |
| chr20 | 61862178  | 61862538  | 361 * | 3.51 | 1.34 |
| chr16 | 85279093  | 85279726  | 634 * | 3.29 | 0.63 |
| chr8  | 143922156 | 143922447 | 292 * | 3.51 | 1.34 |
| chr12 | 130348551 | 130348809 | 259 * | 2.25 | 3.15 |
| chr3  | 2029749   | 2030002   | 254 * | 2.25 | 3.15 |
| chr6  | 159082216 | 159082468 | 253 * | 2.25 | 3.15 |
| chrX  | 75776251  | 75776528  | 278 * | 2.83 | 3.67 |
| chr2  | 117214125 | 117214490 | 366 * | 2.39 | 3.27 |
| chr8  | 35622513  | 35622945  | 433 * | 2.68 | 3.56 |
| chr19 | 12476734  | 12476968  | 235 * | 3.26 | 0.63 |
| chr7  | 106377512 | 106377998 | 487 * | 2.53 | 3.39 |
| chr2  | 149266894 | 149267358 | 465 * | 4.89 | 3.8  |
| chr21 | 22343586  | 22344103  | 518 * | 4.04 | 4.76 |
| chr11 | 20776575  | 20776957  | 383 * | 4.22 | 4.9  |
| chr10 | 98819325  | 98819788  | 464 * | 3.59 | 1.43 |
| chr2  | 209436159 | 209436575 | 417 * | 2.72 | 3.55 |
| chr15 | 23887643  | 23887871  | 229 * | 2.57 | 3.44 |
| chr6  | 67206650  | 67206836  | 187 * | 2.57 | 3.44 |
| chr12 | 121533742 | 121534117 | 376 * | 3.52 | 1.08 |
| chr1  | 40781013  | 40781276  | 264 * | 3.26 | 0.63 |
| chr12 | 129068038 | 129068308 | 271 * | 2.68 | 3.53 |
| chrX  | 135291344 | 135291780 | 437 * | 3.72 | 1.81 |
| chr10 | 46951237  | 46951516  | 280 * | 3.53 | 4.35 |
| chr10 | 107949040 | 107949600 | 561 * | 2.23 | 3.13 |
| chr12 | 130064509 | 130064739 | 231 * | 2.23 | 3.13 |

|       |           |           |       |      |      |
|-------|-----------|-----------|-------|------|------|
| chr4  | 46846420  | 46846716  | 297 * | 2.23 | 3.13 |
| chr6  | 87416111  | 87416518  | 408 * | 2.23 | 3.13 |
| chr9  | 124446504 | 124446967 | 464 * | 3.25 | 0.63 |
| chr8  | 36363232  | 36363473  | 242 * | 2.21 | 3.11 |
| chr9  | 72547763  | 72548194  | 432 * | 2.21 | 3.11 |
| chr10 | 46962514  | 46962888  | 375 * | 4.21 | 4.89 |
| chr11 | 108355500 | 108355865 | 366 * | 3.11 | 3.91 |
| chr6  | 14397491  | 14397812  | 322 * | 3.38 | 0.63 |
| chr4  | 107955207 | 107955799 | 593 * | 3.5  | 1.34 |
| chr10 | 118450317 | 118450655 | 339 * | 2.51 | 3.4  |
| chrX  | 17374097  | 17374400  | 304 * | 2.51 | 3.4  |
| chr21 | 20212534  | 20212838  | 305 * | 2.52 | 3.38 |
| chr1  | 202895803 | 202896267 | 465 * | 3.21 | 0.63 |
| chrX  | 14057417  | 14057832  | 416 * | 3.21 | 0.63 |
| chr9  | 89416901  | 89417192  | 292 * | 2.78 | 3.62 |
| chr1  | 207055942 | 207056289 | 348 * | 2.19 | 3.08 |
| chr12 | 130450676 | 130450882 | 207 * | 2.19 | 3.08 |
| chr5  | 82321658  | 82321872  | 215 * | 2.19 | 3.08 |
| chr8  | 140108612 | 140108821 | 210 * | 2.19 | 3.08 |
| chr18 | 43973148  | 43973663  | 516 * | 3.46 | 1.34 |
| chr17 | 63090139  | 63090491  | 353 * | 2.93 | 3.76 |
| chr3  | 1317170   | 1317529   | 360 * | 2.26 | 3.16 |
| chr8  | 4732782   | 4733246   | 465 * | 2.26 | 3.16 |
| chr8  | 139115082 | 139115350 | 269 * | 2.67 | 3.52 |
| chr2  | 84858277  | 84858519  | 243 * | 2.51 | 3.37 |
| chr19 | 57580586  | 57580874  | 289 * | 2.23 | 3.13 |
| chr9  | 20214868  | 20215264  | 397 * | 2.23 | 3.13 |
| chrX  | 12843108  | 12843426  | 319 * | 2.23 | 3.13 |
| chr15 | 52509325  | 52509871  | 547 * | 3.45 | 1.34 |
| chr5  | 9516771   | 9517359   | 589 * | 3.37 | 1.08 |
| chr2  | 87127876  | 87128145  | 270 * | 2.49 | 3.35 |
| chrX  | 112633861 | 112634087 | 227 * | 2.49 | 3.35 |
| chr14 | 53647669  | 53648179  | 511 * | 3.73 | 4.5  |
| chrX  | 44805062  | 44805362  | 301 * | 2.88 | 3.69 |
| chr7  | 41042640  | 41043191  | 552 * | 5.17 | 5.71 |
| chr16 | 13547753  | 13548175  | 423 * | 4.03 | 4.72 |
| chr2  | 96394539  | 96394988  | 450 * | 3.15 | 0.63 |
| chr9  | 85845969  | 85846306  | 338 * | 3.17 | 0.63 |
| chr11 | 76750305  | 76750740  | 436 * | 3.42 | 1.34 |
| chr1  | 17732495  | 17732940  | 446 * | 3.21 | 0.63 |
| chr12 | 122492272 | 122492706 | 435 * | 3.16 | 0.63 |
| chr7  | 44280480  | 44280892  | 413 * | 4.34 | 3    |
| chr10 | 48119402  | 48119678  | 277 * | 3.44 | 4.25 |



|       |           |           |       |      |      |
|-------|-----------|-----------|-------|------|------|
| chr15 | 31151424  | 31151937  | 514 * | 4.32 | 4.97 |
| chr17 | 5035846   | 5036228   | 383 * | 3.16 | 0.63 |
| chr5  | 101919336 | 101919855 | 520 * | 3.24 | 4.02 |
| chrX  | 12516014  | 12516307  | 294 * | 3.35 | 1.08 |
| chr10 | 111533682 | 111533881 | 200 * | 2.47 | 3.33 |
| chr10 | 133619386 | 133619823 | 438 * | 4.35 | 4.99 |
| chr1  | 34628547  | 34629116  | 570 * | 3.18 | 0.63 |
| chr21 | 29423876  | 29424321  | 446 * | 2.31 | 3.18 |
| chr10 | 92539266  | 92539649  | 384 * | 3.3  | 4.07 |
| chr11 | 35433861  | 35434210  | 350 * | 4.04 | 4.73 |
| chr1  | 208780866 | 208781078 | 213 * | 2.16 | 3.06 |
| chr12 | 130677521 | 130677833 | 313 * | 2.16 | 3.06 |
| chr20 | 11566413  | 11566691  | 279 * | 2.16 | 3.06 |
| chr6  | 164132647 | 164133025 | 379 * | 2.16 | 3.06 |
| chr16 | 73230658  | 73231238  | 581 * | 3.9  | 2.13 |
| chr21 | 31640946  | 31641280  | 335 * | 4.46 | 5.07 |
| chr12 | 116979849 | 116980144 | 296 * | 2.14 | 3.04 |
| chr6  | 32399706  | 32400137  | 432 * | 2.14 | 3.04 |
| chr12 | 110365385 | 110365751 | 367 * | 4.6  | 5.21 |
| chr2  | 28817099  | 28817488  | 390 * | 3.41 | 1.34 |
| chrX  | 64520307  | 64520782  | 476 * | 2.88 | 3.7  |
| chr12 | 129266891 | 129267196 | 306 * | 3.01 | 3.81 |
| chr2  | 23126920  | 23127334  | 415 * | 4.51 | 5.11 |
| chr8  | 139698802 | 139699069 | 268 * | 3.27 | 4.07 |
| chr12 | 78864432  | 78864834  | 403 * | 3.4  | 4.2  |
| chr17 | 50248331  | 50248667  | 337 * | 4.17 | 4.87 |
| chr12 | 129192067 | 129192498 | 432 * | 2.12 | 3.01 |
| chr18 | 68266123  | 68266498  | 376 * | 2.12 | 3.01 |
| chr2  | 22438424  | 22438718  | 295 * | 2.12 | 3.01 |
| chr21 | 48059767  | 48060175  | 409 * | 2.12 | 3.01 |
| chr6  | 72512883  | 72513301  | 419 * | 2.12 | 3.01 |
| chr6  | 86466779  | 86467024  | 246 * | 2.12 | 3.01 |
| chrX  | 109664399 | 109664611 | 213 * | 2.12 | 3.01 |
| chr12 | 128465117 | 128465432 | 316 * | 2.72 | 3.55 |
| chr2  | 178664314 | 178664677 | 364 * | 4.23 | 4.92 |
| chr12 | 53459589  | 53460161  | 573 * | 3.8  | 2.08 |
| chrX  | 155087207 | 155087612 | 406 * | 2.59 | 3.43 |
| chr7  | 120627711 | 120628042 | 332 * | 3.31 | 1.08 |
| chr15 | 78469635  | 78470158  | 524 * | 3.99 | 2.46 |
| chr10 | 109169313 | 109169624 | 312 * | 2.17 | 3.07 |
| chr6  | 64062977  | 64063278  | 302 * | 2.17 | 3.07 |
| chr9  | 82761445  | 82761956  | 512 * | 2.76 | 3.57 |
| chr11 | 61394335  | 61394622  | 288 * | 3.1  | 0.63 |

|       |           |           |       |      |      |
|-------|-----------|-----------|-------|------|------|
| chr8  | 112376506 | 112376724 | 219 * | 2.28 | 3.15 |
| chr12 | 59838780  | 59839058  | 279 * | 2.5  | 3.33 |
| chr11 | 126875612 | 126875935 | 324 * | 2.78 | 3.59 |
| chr1  | 155057158 | 155057427 | 270 * | 4.31 | 3    |
| chr18 | 34874900  | 34875386  | 487 * | 3.78 | 2.08 |
| chr4  | 122386094 | 122386525 | 432 * | 2.57 | 3.41 |
| chr2  | 45956886  | 45957239  | 354 * | 3.37 | 4.13 |
| chr2  | 23862503  | 23862830  | 328 * | 3.1  | 3.88 |
| chr16 | 6399835   | 6400048   | 214 * | 2.42 | 3.27 |
| chr5  | 145239556 | 145239753 | 198 * | 2.42 | 3.27 |
| chr6  | 50160552  | 50160877  | 326 * | 3.86 | 4.6  |
| chr22 | 48022701  | 48022922  | 222 * | 2.2  | 3.1  |
| chr12 | 53264157  | 53264595  | 439 * | 3.36 | 1.34 |
| chr10 | 16958580  | 16958809  | 230 * | 2.09 | 2.98 |
| chr15 | 25064851  | 25065106  | 256 * | 2.09 | 2.98 |
| chr16 | 78553603  | 78553865  | 263 * | 2.09 | 2.98 |
| chr6  | 63601011  | 63601274  | 264 * | 2.09 | 2.98 |
| chr7  | 4542922   | 4543306   | 385 * | 2.09 | 2.98 |
| chr7  | 133793614 | 133793850 | 237 * | 2.09 | 2.98 |
| chr8  | 139709379 | 139709634 | 256 * | 2.09 | 2.98 |
| chr3  | 52157099  | 52157536  | 438 * | 3.61 | 1.81 |
| chr22 | 23035190  | 23035708  | 519 * | 3.72 | 2.03 |
| chr4  | 93084609  | 93084898  | 290 * | 3.65 | 4.42 |
| chr4  | 146812978 | 146813532 | 555 * | 3.06 | 0.63 |
| chr12 | 67555149  | 67555475  | 327 * | 3.94 | 4.69 |
| chr4  | 125865160 | 125865439 | 280 * | 3.06 | 0.63 |
| chr2  | 20335420  | 20335884  | 465 * | 3.35 | 1.34 |
| chr15 | 91576328  | 91576756  | 429 * | 3.97 | 2.46 |
| chr19 | 14429668  | 14430172  | 505 * | 3.09 | 0.63 |
| chr20 | 3332104   | 3332322   | 219 * | 2.24 | 3.11 |
| chr12 | 130395951 | 130396581 | 631 * | 2.44 | 3.32 |
| chr12 | 106751135 | 106751566 | 432 * | 3.06 | 0.63 |
| chr1  | 222942547 | 222942836 | 290 * | 2.95 | 3.76 |
| chr17 | 78623886  | 78624231  | 346 * | 3.59 | 1.81 |
| chr19 | 30185447  | 30185920  | 474 * | 3.16 | 0.63 |
| chr3  | 38521380  | 38521757  | 378 * | 3.45 | 1.43 |
| chr2  | 131752908 | 131753124 | 217 * | 2.74 | 3.57 |
| chr5  | 60517540  | 60517773  | 234 * | 2.14 | 3.03 |
| chr17 | 16266910  | 16267537  | 628 * | 5.06 | 5.62 |
| chr7  | 157030881 | 157031151 | 271 * | 3.04 | 0.63 |
| chr18 | 68245855  | 68246061  | 207 * | 2.32 | 3.19 |
| chr11 | 64455841  | 64456609  | 769 * | 5.19 | 4.33 |
| chr11 | 57835964  | 57836454  | 491 * | 3    | 3.78 |

|       |           |           |       |      |      |
|-------|-----------|-----------|-------|------|------|
| chr16 | 18015178  | 18015785  | 608 * | 3.04 | 0.63 |
| chr8  | 10948471  | 10948752  | 282 * | 2.94 | 3.73 |
| chr9  | 16192088  | 16192548  | 461 * | 3.38 | 1.34 |
| chr19 | 49298445  | 49298830  | 386 * | 3.54 | 1.63 |
| chr5  | 153801343 | 153801834 | 492 * | 3.24 | 1.08 |
| chr2  | 185476207 | 185476558 | 352 * | 3.02 | 0.63 |
| chr19 | 45615761  | 45616221  | 461 * | 3.02 | 0.63 |
| chr7  | 53276831  | 53277312  | 482 * | 3.02 | 0.63 |
| chr6  | 31564638  | 31565154  | 517 * | 3.03 | 0.63 |
| chr4  | 131109803 | 131110024 | 222 * | 2.62 | 3.44 |
| chr12 | 100948333 | 100948852 | 520 * | 5.31 | 5.82 |
| chr10 | 107710173 | 107710416 | 244 * | 3.43 | 4.17 |
| chr1  | 4377364   | 4377564   | 201 * | 2.22 | 3.08 |
| chr19 | 53095559  | 53095865  | 307 * | 2.29 | 3.16 |
| chr11 | 107787318 | 107788067 | 750 * | 4.78 | 3.8  |
| chr5  | 153989891 | 153990201 | 311 * | 3.04 | 0.63 |
| chr3  | 81055164  | 81055504  | 341 * | 2.66 | 3.48 |
| chr2  | 115526719 | 115526991 | 273 * | 2.69 | 3.51 |
| chr8  | 130738526 | 130738937 | 412 * | 4.54 | 5.13 |
| chr18 | 75781300  | 75781553  | 254 * | 2.05 | 2.94 |
| chr3  | 194709207 | 194709516 | 310 * | 2.05 | 2.94 |
| chr6  | 63831191  | 63831571  | 381 * | 2.05 | 2.94 |
| chr10 | 73821174  | 73821687  | 514 * | 3.57 | 1.81 |
| chr4  | 49650577  | 49650855  | 279 * | 3.09 | 3.9  |
| chr14 | 82176657  | 82176963  | 307 * | 3.42 | 4.2  |
| chr12 | 128084815 | 128085111 | 297 * | 2.57 | 3.38 |
| chr22 | 41922691  | 41923050  | 360 * | 3.38 | 1.34 |
| chr12 | 6574660   | 6575083   | 424 * | 5.16 | 5.71 |
| chrX  | 25361257  | 25361519  | 263 * | 2.71 | 3.54 |
| chr10 | 132345767 | 132345980 | 214 * | 2.07 | 2.96 |
| chrX  | 56790860  | 56791187  | 328 * | 3.59 | 4.33 |
| chr5  | 139737284 | 139737529 | 246 * | 3.02 | 0.63 |
| chr8  | 70602279  | 70602577  | 299 * | 3.29 | 0.63 |
| chr4  | 48087135  | 48087484  | 350 * | 2.85 | 3.67 |
| chr5  | 81790789  | 81791104  | 316 * | 2.08 | 2.96 |
| chr13 | 52549958  | 52550358  | 401 * | 2.02 | 2.91 |
| chr18 | 29652416  | 29652750  | 335 * | 2.02 | 2.91 |
| chr2  | 241984074 | 241984302 | 229 * | 2.02 | 2.91 |
| chr6  | 87569372  | 87569583  | 212 * | 2.02 | 2.91 |
| chr8  | 2034482   | 2034836   | 355 * | 2.02 | 2.91 |
| chr16 | 15313873  | 15314169  | 297 * | 3.31 | 1.34 |
| chr21 | 37851218  | 37851537  | 320 * | 2.99 | 0.63 |
| chr10 | 7664940   | 7665286   | 347 * | 3.46 | 1.63 |

|       |           |           |       |      |      |
|-------|-----------|-----------|-------|------|------|
| chr5  | 176087748 | 176088177 | 430 * | 3.99 | 2.46 |
| chr1  | 231726325 | 231726740 | 416 * | 4.44 | 5.11 |
| chr8  | 138738176 | 138738506 | 331 * | 3.33 | 4.09 |
| chr12 | 52477222  | 52477580  | 359 * | 3.94 | 2.31 |
| chr8  | 98607968  | 98608392  | 425 * | 4.87 | 5.44 |
| chr6  | 109159324 | 109159562 | 239 * | 2.99 | 0.63 |
| chr11 | 129233823 | 129234457 | 635 * | 5.37 | 4.51 |
| chr1  | 100816649 | 100817101 | 453 * | 3.56 | 1.81 |
| chr8  | 15235553  | 15236519  | 967 * | 5.73 | 6.19 |
| chr8  | 139739645 | 139740020 | 376 * | 4.97 | 5.5  |
| chr6  | 55141498  | 55141953  | 456 * | 4.12 | 4.77 |
| chr11 | 117466107 | 117466563 | 457 * | 2.97 | 0.63 |
| chrX  | 118551793 | 118552119 | 327 * | 2.97 | 0.63 |
| chr5  | 137785645 | 137786127 | 483 * | 3.26 | 1.08 |
| chr9  | 36995879  | 36996201  | 323 * | 2.97 | 0.63 |
| chr9  | 106082368 | 106082641 | 274 * | 2.27 | 3.11 |
| chr6  | 44081007  | 44081499  | 493 * | 2.66 | 3.49 |
| chr8  | 35345914  | 35346327  | 414 * | 3.32 | 4.09 |
| chr2  | 171823256 | 171823851 | 596 * | 2.97 | 0.63 |
| chr16 | 76673834  | 76674292  | 459 * | 2.81 | 3.63 |
| chr8  | 139963733 | 139963978 | 246 * | 2.34 | 3.18 |
| chr8  | 36716461  | 36716743  | 283 * | 4.06 | 4.74 |
| chr14 | 93500740  | 93501049  | 310 * | 3.06 | 0.63 |
| chr7  | 154432298 | 154432559 | 262 * | 2.37 | 3.22 |
| chrX  | 78337402  | 78337663  | 262 * | 2.37 | 3.22 |
| chr15 | 43517622  | 43518001  | 380 * | 4.66 | 5.25 |
| chr9  | 79611699  | 79612002  | 304 * | 4.21 | 2.96 |
| chr8  | 59447404  | 59447832  | 429 * | 3    | 0.63 |
| chr6  | 62860064  | 62860279  | 216 * | 3.1  | 3.85 |
| chr11 | 104127262 | 104127598 | 337 * | 2.95 | 3.72 |
| chr1  | 156426237 | 156426523 | 287 * | 3.83 | 2.13 |
| chr1  | 171214504 | 171215053 | 550 * | 4.37 | 4.96 |
| chr2  | 117709645 | 117710290 | 646 * | 4.01 | 4.75 |
| chrX  | 40398429  | 40398874  | 446 * | 2.95 | 0.63 |
| chr4  | 12597684  | 12597959  | 276 * | 3.88 | 4.57 |
| chr17 | 74394059  | 74394416  | 358 * | 3.53 | 1.81 |
| chr15 | 98288739  | 98289077  | 339 * | 3.94 | 4.62 |
| chrX  | 51079387  | 51079740  | 354 * | 2.67 | 3.46 |
| chr3  | 172207976 | 172208258 | 283 * | 3.58 | 4.3  |
| chr12 | 1086406   | 1086825   | 420 * | 2.57 | 3.41 |
| chr1  | 120217462 | 120217898 | 437 * | 2.97 | 0.63 |
| chr5  | 161636023 | 161636378 | 356 * | 4.58 | 5.16 |
| chr18 | 47883602  | 47884019  | 418 * | 2.95 | 0.63 |

|       |           |           |       |      |      |
|-------|-----------|-----------|-------|------|------|
| chr17 | 65659629  | 65659840  | 212 * | 2.25 | 3.08 |
| chr12 | 129552157 | 129552376 | 220 * | 1.99 | 2.88 |
| chr15 | 23908445  | 23908674  | 230 * | 1.99 | 2.88 |
| chr15 | 85554004  | 85554217  | 214 * | 1.99 | 2.88 |
| chr16 | 6328135   | 6328380   | 246 * | 1.99 | 2.88 |
| chr17 | 38080800  | 38080967  | 168 * | 1.99 | 2.88 |
| chr2  | 22960090  | 22960321  | 232 * | 1.99 | 2.88 |
| chr3  | 106014592 | 106014850 | 259 * | 1.99 | 2.88 |
| chr3  | 173720432 | 173720646 | 215 * | 1.99 | 2.88 |
| chr4  | 148515243 | 148515650 | 408 * | 1.99 | 2.88 |
| chr9  | 125600875 | 125601095 | 221 * | 1.99 | 2.88 |
| chr4  | 101856189 | 101856630 | 442 * | 2.67 | 3.47 |
| chr14 | 67826550  | 67826986  | 437 * | 3.26 | 1.34 |
| chr1  | 25495056  | 25495355  | 300 * | 2.39 | 3.2  |
| chr16 | 46963594  | 46963985  | 392 * | 2.95 | 0.63 |
| chr1  | 38355866  | 38356472  | 607 * | 4.2  | 4.91 |
| chr2  | 21398468  | 21399033  | 566 * | 2.32 | 3.16 |
| chr1  | 177400323 | 177400746 | 424 * | 2.46 | 3.29 |
| chr14 | 35610033  | 35610286  | 254 * | 2.46 | 3.29 |
| chr3  | 127813912 | 127814421 | 510 * | 2.97 | 0.63 |
| chr12 | 11362057  | 11362335  | 279 * | 2.2  | 3.07 |
| chr16 | 76687311  | 76687749  | 439 * | 2.96 | 3.73 |
| chr3  | 63218447  | 63218951  | 505 * | 2.96 | 3.75 |
| chr20 | 15624387  | 15624759  | 373 * | 2.99 | 3.76 |
| chr19 | 13140781  | 13141215  | 435 * | 3.52 | 1.7  |
| chr4  | 143906331 | 143906707 | 377 * | 2.97 | 3.76 |
| chr3  | 2197919   | 2198350   | 432 * | 2.77 | 3.63 |
| chr8  | 140495546 | 140495951 | 406 * | 2.93 | 3.74 |
| chr1  | 37486280  | 37486580  | 301 * | 2.93 | 0.63 |
| chr9  | 93767414  | 93767774  | 361 * | 2.48 | 3.3  |
| chr7  | 83104705  | 83105041  | 337 * | 2.91 | 0.63 |
| chr17 | 5972229   | 5972538   | 310 * | 3.23 | 1.34 |
| chr4  | 94928477  | 94928755  | 279 * | 2.31 | 3.15 |
| chr16 | 87712238  | 87712471  | 234 * | 2.91 | 0.63 |
| chr3  | 23930110  | 23930594  | 485 * | 3.66 | 1.94 |
| chr1  | 24717776  | 24718179  | 404 * | 4.15 | 2.93 |
| chr2  | 121310497 | 121310780 | 284 * | 2.94 | 0.63 |
| chr4  | 174281696 | 174282176 | 481 * | 3.27 | 1.34 |
| chr15 | 45560205  | 45560703  | 499 * | 4.11 | 4.74 |
| chr6  | 111577856 | 111578164 | 309 * | 3.15 | 3.93 |
| chr2  | 128795237 | 128795578 | 342 * | 2.49 | 3.29 |
| chr8  | 9688277   | 9688901   | 625 * | 6.12 | 6.63 |
| chr11 | 106423636 | 106423843 | 208 * | 2.04 | 2.93 |

|       |           |           |       |      |      |
|-------|-----------|-----------|-------|------|------|
| chr12 | 130534306 | 130534592 | 287 * | 2.04 | 2.93 |
| chr14 | 23322238  | 23323060  | 823 * | 4.69 | 3.65 |
| chr3  | 5649385   | 5649613   | 229 * | 2.13 | 2.98 |
| chr17 | 2833362   | 2833638   | 277 * | 3.53 | 1.81 |
| chrX  | 129159297 | 129159631 | 335 * | 3.72 | 2.17 |
| chr12 | 49782950  | 49783217  | 268 * | 2.93 | 0.63 |
| chr5  | 174163006 | 174163417 | 412 * | 2.91 | 0.63 |
| chr10 | 47600391  | 47600860  | 470 * | 4.8  | 5.36 |
| chr6  | 91186309  | 91187044  | 736 * | 4.73 | 5.31 |
| chr2  | 71222453  | 71223016  | 564 * | 2.89 | 0.63 |
| chr2  | 152525212 | 152525609 | 398 * | 3.1  | 3.9  |
| chr17 | 48164813  | 48165165  | 353 * | 3.86 | 2.27 |
| chr4  | 168998174 | 168998501 | 328 * | 4.54 | 5.11 |
| chr22 | 49178822  | 49179358  | 537 * | 3.53 | 4.27 |
| chr1  | 79788370  | 79788618  | 249 * | 1.95 | 2.82 |
| chr1  | 152505770 | 152506084 | 315 * | 1.95 | 2.82 |
| chr3  | 509865    | 510226    | 362 * | 1.95 | 2.82 |
| chr7  | 10071163  | 10071476  | 314 * | 1.95 | 2.82 |
| chrX  | 110609113 | 110609330 | 218 * | 1.95 | 2.82 |
| chr4  | 69434821  | 69435080  | 260 * | 2.72 | 3.52 |
| chr7  | 51068628  | 51069092  | 465 * | 3.53 | 4.25 |
| chr16 | 6385031   | 6385431   | 401 * | 3.01 | 3.81 |
| chr22 | 23520673  | 23520980  | 308 * | 3.21 | 1.34 |
| chr10 | 49717977  | 49718265  | 289 * | 2.28 | 3.11 |
| chr18 | 42594084  | 42594629  | 546 * | 2.51 | 3.31 |
| chr17 | 40580401  | 40580877  | 477 * | 4.78 | 5.35 |
| chr1  | 204683929 | 204684230 | 302 * | 2.91 | 0.63 |
| chr4  | 32776698  | 32777057  | 360 * | 3.51 | 1.7  |
| chr1  | 27462360  | 27462840  | 481 * | 3.73 | 2.22 |
| chr13 | 101259296 | 101259474 | 179 * | 2.41 | 3.26 |
| chr4  | 64432289  | 64432776  | 488 * | 1.97 | 2.85 |
| chr2  | 143919795 | 143920227 | 433 * | 3.11 | 1.08 |
| chr12 | 55096064  | 55096425  | 362 * | 2.93 | 3.72 |
| chr3  | 197254010 | 197254184 | 175 * | 2.23 | 3.06 |
| chr5  | 159787150 | 159787697 | 548 * | 2.23 | 3.06 |
| chr6  | 139073155 | 139073623 | 469 * | 3.49 | 1.81 |
| chr19 | 46991130  | 46991428  | 299 * | 2.91 | 0.63 |
| chr12 | 125256339 | 125256693 | 355 * | 2.94 | 0.63 |
| chr8  | 90425625  | 90425913  | 289 * | 2.42 | 3.24 |
| chr18 | 69753605  | 69753988  | 384 * | 2.21 | 3.04 |
| chr2  | 64782764  | 64783016  | 253 * | 2.21 | 3.04 |
| chr1  | 189189934 | 189190257 | 324 * | 2.87 | 0.63 |
| chr3  | 38569967  | 38570284  | 318 * | 2.87 | 0.63 |

|       |           |           |       |      |      |
|-------|-----------|-----------|-------|------|------|
| chr3  | 42588906  | 42589375  | 470 * | 3.86 | 2.38 |
| chr11 | 4208213   | 4208473   | 261 * | 3.19 | 1.34 |
| chr15 | 63385819  | 63386221  | 403 * | 3.95 | 2.63 |
| chr8  | 34541665  | 34541995  | 331 * | 3.47 | 4.23 |
| chr7  | 157021545 | 157022015 | 471 * | 3.49 | 1.7  |
| chr16 | 67975942  | 67976553  | 612 * | 4.06 | 2.7  |
| chr3  | 138047217 | 138047519 | 303 * | 3.02 | 3.79 |
| chr4  | 78499312  | 78499637  | 326 * | 3.04 | 3.78 |
| chr13 | 61576910  | 61577185  | 276 * | 1.92 | 2.79 |
| chr13 | 80077368  | 80077705  | 338 * | 1.92 | 2.79 |
| chr14 | 46340245  | 46340511  | 267 * | 1.92 | 2.79 |
| chr3  | 2682491   | 2682723   | 233 * | 1.92 | 2.79 |
| chr3  | 112994721 | 112995169 | 449 * | 1.92 | 2.79 |
| chr4  | 173792519 | 173792776 | 258 * | 1.92 | 2.79 |
| chr5  | 71378015  | 71378335  | 321 * | 1.92 | 2.79 |
| chr5  | 121226229 | 121226545 | 317 * | 1.92 | 2.79 |
| chr8  | 20325118  | 20325309  | 192 * | 1.92 | 2.79 |
| chr8  | 139654382 | 139654584 | 203 * | 1.92 | 2.79 |
| chr20 | 19769638  | 19770506  | 869 * | 3.48 | 4.19 |
| chr11 | 61284295  | 61284738  | 444 * | 3.91 | 2.46 |
| chr16 | 75823062  | 75823514  | 453 * | 3.99 | 4.69 |
| chr15 | 29860987  | 29861497  | 511 * | 3.85 | 4.51 |
| chr10 | 133252443 | 133252621 | 179 * | 1.97 | 2.85 |
| chr19 | 14167610  | 14167881  | 272 * | 1.97 | 2.85 |
| chr8  | 137382269 | 137382452 | 184 * | 1.97 | 2.85 |
| chr14 | 38666333  | 38666848  | 516 * | 3.73 | 4.41 |
| chr11 | 130301184 | 130301555 | 372 * | 3.95 | 4.6  |
| chr3  | 53144233  | 53144633  | 401 * | 3.88 | 2.43 |
| chr1  | 180592933 | 180593446 | 514 * | 2.32 | 3.16 |
| chr10 | 119212109 | 119212471 | 363 * | 2.32 | 3.16 |
| chr4  | 182919805 | 182920109 | 305 * | 2.32 | 3.16 |
| chrX  | 56274729  | 56275382  | 654 * | 3.98 | 4.69 |
| chr2  | 157013196 | 157013615 | 420 * | 3.63 | 1.94 |
| chr2  | 241929232 | 241929521 | 290 * | 3.69 | 2.17 |
| chr16 | 58131172  | 58131418  | 247 * | 3.29 | 1.34 |
| chr6  | 39699353  | 39699613  | 261 * | 2.45 | 3.24 |
| chr6  | 135827472 | 135827869 | 398 * | 2.85 | 0.63 |
| chr4  | 47492637  | 47492943  | 307 * | 2.88 | 0.63 |
| chr17 | 44272264  | 44272888  | 625 * | 4.49 | 5.15 |
| chr14 | 73698538  | 73698977  | 440 * | 2.84 | 0.63 |
| chrX  | 38025574  | 38026281  | 708 * | 2.84 | 0.63 |
| chr3  | 5772839   | 5773135   | 297 * | 3.4  | 4.12 |
| chr6  | 37274652  | 37274938  | 287 * | 2.55 | 3.33 |

|       |           |           |       |      |      |
|-------|-----------|-----------|-------|------|------|
| chrX  | 77347747  | 77348251  | 505 * | 3.07 | 1.08 |
| chr2  | 71016752  | 71017093  | 342 * | 3.85 | 2.31 |
| chr11 | 69696790  | 69697115  | 326 * | 3    | 3.78 |
| chr6  | 50232735  | 50233055  | 321 * | 3    | 3.78 |
| chr1  | 158087579 | 158087976 | 398 * | 3.76 | 2.27 |
| chr15 | 88878408  | 88878698  | 291 * | 2.84 | 0.63 |
| chr15 | 89013923  | 89014425  | 503 * | 2.29 | 3.13 |
| chr17 | 79014676  | 79015000  | 325 * | 3.31 | 1.43 |
| chr1  | 201417192 | 201417581 | 390 * | 3.07 | 1.08 |
| chr17 | 70475303  | 70475692  | 390 * | 2.82 | 0.63 |
| chr19 | 54096275  | 54096486  | 212 * | 2.82 | 0.63 |
| chr6  | 157505262 | 157505776 | 515 * | 2.82 | 0.63 |
| chr1  | 202243714 | 202244091 | 378 * | 2.83 | 0.63 |
| chr11 | 11177608  | 11177932  | 325 * | 3.46 | 1.81 |
| chr19 | 18302678  | 18303043  | 366 * | 2.67 | 3.46 |
| chr5  | 158846656 | 158846949 | 294 * | 3.06 | 3.8  |
| chr1  | 90228580  | 90228975  | 396 * | 3.42 | 1.34 |
| chr6  | 29596456  | 29596712  | 257 * | 2.88 | 0.63 |
| chr2  | 67549812  | 67550138  | 327 * | 3.42 | 4.14 |
| chr22 | 29985936  | 29986284  | 349 * | 5.08 | 5.58 |
| chr10 | 87077693  | 87077940  | 248 * | 2.33 | 3.13 |
| chr1  | 246859757 | 246860099 | 343 * | 3.71 | 2.17 |
| chr2  | 112448147 | 112448416 | 270 * | 2.31 | 3.11 |
| chr5  | 78629950  | 78630277  | 328 * | 2.94 | 3.7  |
| chr11 | 45361560  | 45361922  | 363 * | 3.89 | 2.46 |
| chr16 | 79192256  | 79192455  | 200 * | 2.1  | 2.96 |
| chr13 | 111471766 | 111472245 | 480 * | 3.18 | 1.34 |
| chr13 | 30304370  | 30304672  | 303 * | 2.52 | 3.33 |
| chr3  | 133864087 | 133864287 | 201 * | 2.52 | 3.33 |
| chr8  | 140049698 | 140050200 | 503 * | 2.76 | 3.55 |
| chr16 | 55205016  | 55205454  | 439 * | 2.11 | 2.96 |
| chr8  | 5215208   | 5215757   | 550 * | 2.11 | 2.96 |
| chr4  | 40311073  | 40311703  | 631 * | 3.16 | 1.34 |
| chr2  | 33895554  | 33896071  | 518 * | 3.32 | 4.03 |
| chr1  | 34189897  | 34190226  | 330 * | 2.82 | 0.63 |
| chr17 | 46801976  | 46802556  | 581 * | 2.82 | 0.63 |
| chr17 | 76783423  | 76783732  | 310 * | 2.82 | 0.63 |
| chr8  | 29873655  | 29873902  | 248 * | 2.89 | 3.65 |
| chr12 | 120773300 | 120773563 | 264 * | 3.27 | 1.43 |
| chr16 | 56366507  | 56366958  | 452 * | 2.9  | 0.63 |
| chr7  | 132892535 | 132892823 | 289 * | 3.13 | 3.87 |
| chr12 | 127232079 | 127232594 | 516 * | 2.66 | 3.43 |
| chr15 | 90836517  | 90837059  | 543 * | 4.87 | 4.01 |



|       |           |           |       |      |      |
|-------|-----------|-----------|-------|------|------|
| chr20 | 16646878  | 16647227  | 350 * | 3.08 | 3.85 |
| chr2  | 190042876 | 190043083 | 208 * | 2.16 | 2.98 |
| chr22 | 23126767  | 23127000  | 234 * | 2.16 | 2.98 |
| chr2  | 168940937 | 168941242 | 306 * | 2.48 | 3.28 |
| chr5  | 179297557 | 179297995 | 439 * | 3.14 | 1.34 |
| chrX  | 21951272  | 21951680  | 409 * | 3.14 | 1.34 |
| chrX  | 44929513  | 44930008  | 496 * | 3.67 | 4.41 |
| chr17 | 78873100  | 78873513  | 414 * | 2.85 | 0.63 |
| chr1  | 109819966 | 109820406 | 441 * | 4.25 | 3.15 |
| chr1  | 65289821  | 65290260  | 440 * | 4.13 | 4.82 |
| chr21 | 23293898  | 23294275  | 378 * | 2.83 | 0.63 |
| chr10 | 115870355 | 115870638 | 284 * | 3.07 | 1.08 |
| chr16 | 782950    | 783258    | 309 * | 3.07 | 1.08 |
| chr2  | 60886208  | 60886486  | 279 * | 2.37 | 3.18 |
| chr22 | 48888232  | 48888488  | 257 * | 3.99 | 4.62 |
| chr4  | 118629521 | 118629806 | 286 * | 2.88 | 3.64 |
| chr14 | 21402245  | 21402722  | 478 * | 3.16 | 1.34 |
| chrX  | 129213741 | 129214140 | 400 * | 3.87 | 2.53 |
| chr11 | 14929120  | 14929641  | 522 * | 3.13 | 1.34 |
| chr2  | 233309146 | 233309492 | 347 * | 3.13 | 1.34 |
| chr20 | 62765533  | 62765951  | 419 * | 2.81 | 0.63 |
| chr1  | 105560358 | 105560534 | 177 * | 1.89 | 2.76 |
| chr10 | 107439573 | 107439867 | 295 * | 1.89 | 2.76 |
| chr11 | 35163980  | 35164161  | 182 * | 1.89 | 2.76 |
| chr11 | 93840647  | 93840877  | 231 * | 1.89 | 2.76 |
| chr11 | 107638299 | 107638494 | 196 * | 1.89 | 2.76 |
| chr12 | 128174794 | 128175003 | 210 * | 1.89 | 2.76 |
| chr17 | 45853317  | 45853513  | 197 * | 1.89 | 2.76 |
| chr2  | 135540418 | 135540612 | 195 * | 1.89 | 2.76 |
| chr2  | 175501716 | 175501990 | 275 * | 1.89 | 2.76 |
| chr3  | 118543531 | 118543764 | 234 * | 1.89 | 2.76 |
| chr4  | 65040071  | 65040241  | 171 * | 1.89 | 2.76 |
| chr4  | 69241253  | 69241436  | 184 * | 1.89 | 2.76 |
| chr4  | 166440368 | 166440642 | 275 * | 1.89 | 2.76 |
| chr9  | 4355173   | 4355418   | 246 * | 1.89 | 2.76 |
| chrX  | 13960804  | 13961071  | 268 * | 1.89 | 2.76 |
| chrX  | 114380687 | 114381096 | 410 * | 1.89 | 2.76 |
| chr3  | 142650073 | 142650405 | 333 * | 2.8  | 0.63 |
| chr3  | 193885990 | 193886342 | 353 * | 3.07 | 3.83 |
| chr22 | 21457140  | 21457517  | 378 * | 3.8  | 2.38 |
| chr17 | 2752115   | 2752552   | 438 * | 4.31 | 3.24 |
| chr10 | 135164957 | 135165357 | 401 * | 2.88 | 0.63 |
| chr1  | 108329885 | 108330419 | 535 * | 4.54 | 5.13 |

|       |           |           |       |      |      |
|-------|-----------|-----------|-------|------|------|
| chr10 | 13116757  | 13117369  | 613 * | 4.38 | 3.36 |
| chr10 | 82203337  | 82203652  | 316 * | 2.78 | 0.63 |
| chr5  | 33300021  | 33300375  | 355 * | 2.78 | 0.63 |
| chr6  | 160940834 | 160941318 | 485 * | 2.78 | 0.63 |
| chr19 | 2613753   | 2614120   | 368 * | 3.99 | 2.69 |
| chrX  | 86593404  | 86594061  | 658 * | 2.43 | 3.25 |
| chr7  | 152530395 | 152530743 | 349 * | 3.86 | 4.54 |
| chr7  | 5405585   | 5405983   | 399 * | 5.14 | 5.66 |
| chr4  | 164469683 | 164470084 | 402 * | 4.19 | 4.8  |
| chr6  | 166272022 | 166272428 | 407 * | 2.78 | 0.63 |
| chrX  | 109656361 | 109656671 | 311 * | 4.91 | 4.09 |
| chr22 | 30822439  | 30822798  | 360 * | 3.13 | 1.34 |
| chr1  | 153590127 | 153590401 | 275 * | 2.82 | 0.63 |
| chr11 | 57224887  | 57225198  | 312 * | 3.67 | 2.17 |
| chr2  | 161285830 | 161286270 | 441 * | 3.63 | 4.31 |
| chr10 | 27945502  | 27946177  | 676 * | 4.09 | 4.72 |
| chr6  | 168472251 | 168472645 | 395 * | 3.84 | 2.46 |
| chr20 | 35823791  | 35824322  | 532 * | 5.06 | 5.57 |
| chr6  | 57540425  | 57540728  | 304 * | 3.86 | 4.51 |
| chrX  | 69253244  | 69253702  | 459 * | 3.02 | 1.08 |
| chr12 | 32810570  | 32810861  | 292 * | 2.78 | 0.63 |
| chr1  | 23000546  | 23001099  | 554 * | 4.39 | 4.98 |
| chr3  | 72900421  | 72900822  | 402 * | 3.02 | 1.08 |
| chr1  | 182570477 | 182570971 | 495 * | 3.3  | 1.63 |
| chr3  | 133629224 | 133629570 | 347 * | 3.78 | 4.46 |
| chr7  | 150820887 | 150821470 | 584 * | 4.83 | 3.99 |
| chr12 | 84217407  | 84217738  | 332 * | 3.73 | 4.43 |
| chr10 | 45360084  | 45360656  | 573 * | 2.8  | 0.63 |
| chr15 | 22802993  | 22803204  | 212 * | 3.07 | 3.81 |
| chr4  | 121693135 | 121693416 | 282 * | 2.19 | 3.01 |
| chr4  | 154267821 | 154268055 | 235 * | 2.19 | 3.01 |
| chr16 | 66376233  | 66376537  | 305 * | 4.03 | 2.69 |
| chr16 | 33963012  | 33963207  | 196 * | 2.92 | 0.63 |
| chr20 | 37063944  | 37064390  | 447 * | 2.92 | 0.63 |
| chr7  | 114996223 | 114996507 | 285 * | 3.3  | 4.01 |
| chr6  | 23592108  | 23592384  | 277 * | 2.65 | 3.44 |
| chrX  | 62348071  | 62348304  | 234 * | 2.65 | 3.44 |
| chr5  | 149217242 | 149217581 | 340 * | 4.18 | 3.06 |
| chr8  | 146252123 | 146252497 | 375 * | 3.9  | 4.55 |
| chr3  | 4287294   | 4287621   | 328 * | 2.51 | 3.31 |
| chr3  | 122018768 | 122019091 | 324 * | 4.02 | 4.66 |
| chr15 | 60286031  | 60286510  | 480 * | 2.76 | 0.63 |
| chr20 | 6054855   | 6055166   | 312 * | 2.76 | 0.63 |

|       |           |           |       |      |      |
|-------|-----------|-----------|-------|------|------|
| chr19 | 34258687  | 34259069  | 383 * | 3.11 | 1.34 |
| chr4  | 123835537 | 123835798 | 262 * | 3.02 | 1.08 |
| chr17 | 1998322   | 1998653   | 332 * | 2.76 | 0.63 |
| chr19 | 38389346  | 38389636  | 291 * | 2.76 | 0.63 |
| chr1  | 43888035  | 43888332  | 298 * | 2.76 | 0.63 |
| chr10 | 104429564 | 104429842 | 279 * | 2.76 | 0.63 |
| chr14 | 29220570  | 29220978  | 409 * | 3.42 | 1.7  |
| chr5  | 19262022  | 19262273  | 252 * | 2.5  | 3.3  |
| chr22 | 29552548  | 29552926  | 379 * | 3.21 | 1.34 |
| chr11 | 61021942  | 61022335  | 394 * | 4.64 | 3.73 |
| chrX  | 134730438 | 134730808 | 371 * | 3.4  | 1.81 |
| chr12 | 130531979 | 130532151 | 173 * | 2.03 | 2.88 |
| chr21 | 19894588  | 19894804  | 217 * | 2.03 | 2.88 |
| chr8  | 70986758  | 70987039  | 282 * | 2.03 | 2.88 |
| chrX  | 81473790  | 81474339  | 550 * | 2.03 | 2.88 |
| chr2  | 49717735  | 49718325  | 591 * | 4.86 | 5.44 |
| chr7  | 107514978 | 107515487 | 510 * | 3.62 | 4.34 |
| chr2  | 241133716 | 241134154 | 439 * | 2.71 | 3.49 |
| chr6  | 67776398  | 67776661  | 264 * | 2.64 | 3.41 |
| chr12 | 58150530  | 58150928  | 399 * | 3.46 | 1.81 |
| chr8  | 15718187  | 15718544  | 358 * | 2.76 | 0.63 |
| chr8  | 2671976   | 2672357   | 382 * | 3.42 | 4.12 |
| chr10 | 95493276  | 95493666  | 391 * | 1.87 | 2.74 |
| chr10 | 133286139 | 133286463 | 325 * | 1.87 | 2.74 |
| chr15 | 35182324  | 35182611  | 288 * | 1.87 | 2.74 |
| chr18 | 5794935   | 5795323   | 389 * | 1.87 | 2.74 |
| chr6  | 164767659 | 164768018 | 360 * | 1.87 | 2.74 |
| chr7  | 14774809  | 14775202  | 394 * | 1.87 | 2.74 |
| chr9  | 1709407   | 1709680   | 274 * | 1.87 | 2.74 |
| chrX  | 17025286  | 17025573  | 288 * | 1.87 | 2.74 |
| chrX  | 119903890 | 119904258 | 369 * | 1.87 | 2.74 |
| chr17 | 66196834  | 66197164  | 331 * | 2.78 | 0.63 |
| chr11 | 71274463  | 71274902  | 440 * | 3.96 | 4.62 |
| chr12 | 118160749 | 118160988 | 240 * | 1.84 | 2.7  |
| chr13 | 23143960  | 23144267  | 308 * | 1.84 | 2.7  |
| chrX  | 8541790   | 8542165   | 376 * | 1.84 | 2.7  |
| chr3  | 48474135  | 48474800  | 666 * | 3.02 | 1.08 |
| chr19 | 3326932   | 3327297   | 366 * | 5.15 | 5.65 |
| chr21 | 26655912  | 26656509  | 598 * | 2.81 | 0.63 |
| chr7  | 128523622 | 128524010 | 389 * | 3.02 | 1.08 |
| chr3  | 4763623   | 4764140   | 518 * | 2.76 | 0.63 |
| chr2  | 70872981  | 70873224  | 244 * | 2.94 | 3.71 |
| chr1  | 19975254  | 19975593  | 340 * | 4.03 | 2.79 |

|       |           |           |       |      |      |
|-------|-----------|-----------|-------|------|------|
| chr3  | 49131944  | 49132352  | 409 * | 3.64 | 2.17 |
| chr11 | 47464636  | 47464969  | 334 * | 2.01 | 2.9  |
| chr16 | 6661608   | 6661819   | 212 * | 2.01 | 2.9  |
| chrX  | 26667713  | 26667983  | 271 * | 2.76 | 3.52 |
| chr11 | 61245160  | 61245526  | 367 * | 3.05 | 1.08 |
| chr12 | 10078414  | 10079008  | 595 * | 3    | 1.08 |
| chr9  | 104554234 | 104554558 | 325 * | 2.96 | 3.69 |
| chr13 | 104414875 | 104415517 | 643 * | 2.98 | 3.7  |
| chr12 | 56907439  | 56908079  | 641 * | 4.41 | 4.98 |
| chr1  | 38260545  | 38260962  | 418 * | 2.78 | 0.63 |
| chr14 | 34800821  | 34801236  | 416 * | 3.9  | 2.47 |
| chr11 | 42799788  | 42800136  | 349 * | 2.76 | 0.63 |
| chr2  | 142938739 | 142939158 | 420 * | 2.74 | 0.63 |
| chr3  | 153688538 | 153688871 | 334 * | 2.74 | 0.63 |
| chr7  | 104524107 | 104524453 | 347 * | 4.34 | 3.2  |
| chr9  | 26975672  | 26976020  | 349 * | 2.94 | 3.69 |
| chr5  | 148648507 | 148648944 | 438 * | 2.89 | 3.67 |
| chr17 | 49811831  | 49812172  | 342 * | 2.74 | 0.63 |
| chr5  | 8473954   | 8474343   | 390 * | 3.25 | 3.95 |
| chrX  | 118646431 | 118646781 | 351 * | 3.75 | 2.38 |
| chr8  | 33663267  | 33663691  | 425 * | 4.09 | 4.74 |
| chr6  | 110213815 | 110213974 | 160 * | 1.94 | 2.81 |
| chr9  | 29461164  | 29461446  | 283 * | 1.94 | 2.81 |
| chr5  | 134797939 | 134798416 | 478 * | 3.07 | 1.34 |
| chr17 | 2148033   | 2148450   | 418 * | 3.94 | 2.73 |
| chr17 | 76989126  | 76989819  | 694 * | 2.74 | 0.63 |
| chr21 | 20880127  | 20880409  | 283 * | 2.93 | 3.69 |
| chr21 | 34499326  | 34500065  | 740 * | 5.06 | 5.55 |
| chr16 | 78128014  | 78128356  | 343 * | 2.68 | 3.43 |
| chr19 | 39600995  | 39601404  | 410 * | 3.21 | 1.43 |
| chr3  | 117268340 | 117268832 | 493 * | 2.37 | 3.15 |
| chr6  | 62596407  | 62596800  | 394 * | 2.37 | 3.15 |
| chr10 | 11207921  | 11208413  | 493 * | 2.76 | 0.63 |
| chr18 | 29557069  | 29557681  | 613 * | 4.01 | 4.63 |
| chr6  | 114200677 | 114201034 | 358 * | 2.98 | 1.08 |
| chr19 | 23466750  | 23467150  | 401 * | 3.82 | 2.43 |
| chr16 | 7075719   | 7075969   | 251 * | 2.09 | 2.91 |
| chr3  | 21588883  | 21589142  | 260 * | 3.13 | 3.87 |
| chr3  | 188865823 | 188866179 | 357 * | 3.36 | 4.08 |
| chr1  | 19210639  | 19211017  | 379 * | 3.88 | 2.6  |
| chr3  | 52854710  | 52855123  | 414 * | 3.95 | 2.73 |
| chr11 | 56289471  | 56289734  | 264 * | 2.15 | 2.96 |
| chr17 | 34959381  | 34959677  | 297 * | 4.49 | 5.04 |

|       |           |           |       |      |      |
|-------|-----------|-----------|-------|------|------|
| chr22 | 23110344  | 23110777  | 434 * | 3.4  | 1.81 |
| chr11 | 61103563  | 61104274  | 712 * | 2.78 | 0.63 |
| chr16 | 69373394  | 69373679  | 286 * | 2.78 | 0.63 |
| chr4  | 9150419   | 9150747   | 329 * | 2.5  | 3.27 |
| chr10 | 135121269 | 135121565 | 297 * | 3.07 | 1.34 |
| chr6  | 408673    | 409145    | 473 * | 4.14 | 4.76 |
| chr1  | 210413100 | 210413727 | 628 * | 3.78 | 4.5  |
| chr6  | 120992723 | 120993083 | 361 * | 2.59 | 3.35 |
| chr7  | 41281191  | 41281593  | 403 * | 2.59 | 3.35 |
| chr16 | 30441503  | 30442118  | 616 * | 2.98 | 1.08 |
| chr4  | 17325866  | 17326329  | 464 * | 3.07 | 1.34 |
| chr13 | 108829085 | 108829383 | 299 * | 3.6  | 4.3  |
| chr6  | 30421317  | 30421735  | 419 * | 4.46 | 3.41 |
| chr5  | 112999607 | 112999930 | 324 * | 4.31 | 4.9  |
| chr12 | 100314401 | 100314923 | 523 * | 2.55 | 3.33 |
| chr7  | 22143303  | 22143700  | 398 * | 4.16 | 4.75 |
| chr12 | 92537814  | 92538205  | 392 * | 2.74 | 0.63 |
| chr3  | 13254089  | 13254337  | 249 * | 2.16 | 2.98 |
| chr13 | 87932467  | 87932740  | 274 * | 2.31 | 3.11 |
| chrX  | 16689201  | 16689506  | 306 * | 3.41 | 4.1  |
| chr2  | 220298515 | 220299007 | 493 * | 5.06 | 5.55 |
| chr4  | 96558182  | 96558598  | 417 * | 4.03 | 4.65 |
| chr2  | 165512357 | 165512550 | 194 * | 2.44 | 3.26 |
| chr13 | 75147830  | 75148275  | 446 * | 3.19 | 1.43 |
| chr1  | 212922985 | 212923646 | 662 * | 5.02 | 5.59 |
| chr17 | 21066533  | 21066751  | 219 * | 2.08 | 2.93 |
| chr22 | 42337323  | 42337668  | 346 * | 2.8  | 0.63 |
| chr11 | 116293684 | 116294028 | 345 * | 2.76 | 0.63 |
| chr21 | 44598555  | 44599046  | 492 * | 2.73 | 0.63 |
| chr16 | 88821932  | 88822203  | 272 * | 3.25 | 1.63 |
| chr8  | 110463115 | 110463552 | 438 * | 2.71 | 0.63 |
| chr5  | 75897286  | 75897661  | 376 * | 4.92 | 5.41 |
| chr12 | 17410476  | 17410714  | 239 * | 1.8  | 2.67 |
| chr12 | 40860745  | 40861113  | 369 * | 1.8  | 2.67 |
| chr17 | 13894371  | 13894567  | 197 * | 1.8  | 2.67 |
| chr17 | 43584829  | 43585006  | 178 * | 1.8  | 2.67 |
| chr18 | 69986540  | 69986793  | 254 * | 1.8  | 2.67 |
| chr2  | 192214857 | 192215094 | 238 * | 1.8  | 2.67 |
| chr3  | 175889240 | 175889440 | 201 * | 1.8  | 2.67 |
| chr4  | 163786376 | 163786597 | 222 * | 1.8  | 2.67 |
| chr5  | 43944541  | 43944788  | 248 * | 1.8  | 2.67 |
| chr6  | 56792995  | 56793162  | 168 * | 1.8  | 2.67 |
| chr6  | 57310596  | 57310839  | 244 * | 1.8  | 2.67 |

|       |           |           |       |      |      |
|-------|-----------|-----------|-------|------|------|
| chr6  | 65179396  | 65179616  | 221 * | 1.8  | 2.67 |
| chrX  | 73102716  | 73103050  | 335 * | 1.8  | 2.67 |
| chr16 | 75798035  | 75798374  | 340 * | 2.57 | 3.35 |
| chr2  | 84054835  | 84055314  | 480 * | 2.57 | 3.35 |
| chr3  | 164110775 | 164111280 | 506 * | 2.57 | 3.35 |
| chr5  | 166064092 | 166064375 | 284 * | 2.57 | 3.35 |
| chr6  | 63604998  | 63605339  | 342 * | 1.99 | 2.82 |
| chr4  | 135786848 | 135787330 | 483 * | 2.91 | 3.67 |
| chr1  | 185425994 | 185426305 | 312 * | 2.45 | 3.24 |
| chr6  | 153884213 | 153884473 | 261 * | 2.45 | 3.24 |
| chr8  | 37709008  | 37709318  | 311 * | 3.79 | 2.31 |
| chr15 | 33967428  | 33967890  | 463 * | 3.79 | 4.46 |
| chr7  | 33225317  | 33225687  | 371 * | 4.3  | 4.88 |
| chr16 | 21813077  | 21813660  | 584 * | 3.67 | 4.34 |
| chr16 | 86868118  | 86868616  | 499 * | 3.05 | 1.34 |
| chr6  | 37659809  | 37660150  | 342 * | 2.78 | 0.63 |
| chr11 | 64257144  | 64257722  | 579 * | 2.71 | 0.63 |
| chr22 | 46751359  | 46751633  | 275 * | 2.71 | 0.63 |
| chr11 | 72504428  | 72505114  | 687 * | 3.11 | 1.34 |
| chr16 | 77410235  | 77410637  | 403 * | 3.67 | 2.13 |
| chr9  | 2991356   | 2991613   | 258 * | 2.61 | 3.37 |
| chr5  | 148644309 | 148644659 | 351 * | 2.96 | 1.08 |
| chr10 | 99519192  | 99519603  | 412 * | 4.48 | 3.48 |
| chr21 | 31630173  | 31630443  | 271 * | 3.56 | 4.23 |
| chr7  | 25748729  | 25748961  | 233 * | 2.01 | 2.85 |
| chr9  | 108720978 | 108721354 | 377 * | 2.01 | 2.85 |
| chr11 | 55710253  | 55710617  | 365 * | 4.22 | 4.8  |
| chr4  | 35409351  | 35409621  | 271 * | 2.73 | 0.63 |
| chr14 | 77519613  | 77520040  | 428 * | 3.16 | 1.34 |
| chr21 | 43960030  | 43960337  | 308 * | 3.16 | 1.34 |
| chr15 | 101810052 | 101810400 | 349 * | 2.72 | 0.63 |
| chr12 | 33580011  | 33580336  | 326 * | 3.02 | 3.75 |
| chr14 | 21341742  | 21342109  | 368 * | 3.05 | 1.34 |
| chr2  | 173860703 | 173860969 | 267 * | 2.34 | 3.11 |
| chr4  | 21791991  | 21792539  | 549 * | 2.36 | 3.13 |
| chr10 | 69916126  | 69916473  | 348 * | 5.05 | 5.54 |
| chr19 | 41250431  | 41250765  | 335 * | 2.71 | 0.63 |
| chr6  | 30332452  | 30332835  | 384 * | 3.41 | 4.1  |
| chr7  | 109484397 | 109484780 | 384 * | 4.01 | 4.63 |
| chr17 | 38242692  | 38243010  | 319 * | 2.76 | 0.63 |
| chr20 | 38879908  | 38880339  | 432 * | 4.11 | 2.98 |
| chrX  | 102205912 | 102206817 | 906 * | 4.3  | 4.91 |
| chr6  | 27763531  | 27764012  | 482 * | 4.12 | 4.72 |

|       |           |           |       |      |      |
|-------|-----------|-----------|-------|------|------|
| chr20 | 46249929  | 46250346  | 418 * | 3.84 | 4.48 |
| chr1  | 202691256 | 202691645 | 390 * | 1.86 | 2.73 |
| chr12 | 128743570 | 128743794 | 225 * | 1.86 | 2.73 |
| chr2  | 163708802 | 163708981 | 180 * | 1.86 | 2.73 |
| chr4  | 9160103   | 9160378   | 276 * | 1.86 | 2.73 |
| chr4  | 127827648 | 127827917 | 270 * | 1.86 | 2.73 |
| chr5  | 103123872 | 103124224 | 353 * | 1.86 | 2.73 |
| chr6  | 62511904  | 62512099  | 196 * | 1.86 | 2.73 |
| chr16 | 85693429  | 85693727  | 299 * | 3.6  | 2.17 |
| chr14 | 82475240  | 82475824  | 585 * | 2.69 | 3.46 |
| chr20 | 7356506   | 7356938   | 433 * | 2.69 | 3.46 |
| chr9  | 116117466 | 116117836 | 371 * | 2.35 | 3.16 |
| chr3  | 66124245  | 66124738  | 494 * | 4.86 | 5.35 |
| chr5  | 136226931 | 136227139 | 209 * | 2.61 | 3.36 |
| chr2  | 218852665 | 218853065 | 401 * | 3.08 | 1.34 |
| chrX  | 9587673   | 9587966   | 294 * | 2.69 | 0.63 |
| chr2  | 177921216 | 177921578 | 363 * | 3.65 | 4.34 |
| chr18 | 69451948  | 69452303  | 356 * | 2.21 | 3.03 |
| chr17 | 7124262   | 7124613   | 352 * | 2.69 | 0.63 |
| chr3  | 64666680  | 64667202  | 523 * | 2.69 | 0.63 |
| chr6  | 100624136 | 100624880 | 745 * | 2.94 | 1.08 |
| chrX  | 34076126  | 34076441  | 316 * | 3.53 | 4.21 |
| chr10 | 45730700  | 45730995  | 296 * | 3    | 3.75 |
| chr5  | 129579382 | 129579633 | 252 * | 2.63 | 3.39 |
| chr9  | 133928623 | 133929027 | 405 * | 2.94 | 1.08 |
| chr3  | 674304    | 674637    | 334 * | 3.01 | 3.72 |
| chr1  | 221047622 | 221047916 | 295 * | 2.71 | 0.63 |
| chr14 | 97893170  | 97893403  | 234 * | 2.71 | 0.63 |
| chr2  | 47600912  | 47601396  | 485 * | 3.71 | 4.37 |
| chr16 | 21167923  | 21168367  | 445 * | 3.26 | 3.98 |
| chr8  | 145150921 | 145151337 | 417 * | 2.73 | 0.63 |
| chr12 | 132819953 | 132820219 | 267 * | 2.78 | 0.63 |
| chr15 | 98392467  | 98392730  | 264 * | 2.28 | 3.08 |
| chr5  | 169765910 | 169766277 | 368 * | 4.87 | 4.08 |
| chr3  | 40233321  | 40233720  | 400 * | 3.57 | 4.24 |
| chr2  | 60229361  | 60229927  | 567 * | 2.36 | 3.13 |
| chr3  | 72704961  | 72705374  | 414 * | 3.59 | 2.17 |
| chr19 | 54941280  | 54941496  | 217 * | 2.41 | 3.19 |
| chr1  | 12091354  | 12091685  | 332 * | 2.69 | 0.63 |
| chr5  | 134252720 | 134253102 | 383 * | 2.69 | 0.63 |
| chr10 | 98956219  | 98956660  | 442 * | 3.4  | 1.88 |
| chr7  | 158118805 | 158119107 | 303 * | 3.37 | 1.81 |
| chrX  | 109411120 | 109411621 | 502 * | 3.55 | 2.08 |

|       |           |           |       |      |      |
|-------|-----------|-----------|-------|------|------|
| chr6  | 67372129  | 67372458  | 330 * | 1.96 | 2.79 |
| chrX  | 147634271 | 147634652 | 382 * | 1.96 | 2.79 |
| chr1  | 17563399  | 17563890  | 492 * | 2.75 | 0.63 |
| chr9  | 101737176 | 101737667 | 492 * | 2.75 | 0.63 |
| chr11 | 31892690  | 31892895  | 206 * | 3.16 | 1.43 |
| chr16 | 26776475  | 26777056  | 582 * | 2.42 | 3.2  |
| chr18 | 56067262  | 56067733  | 472 * | 4.03 | 2.88 |
| chr11 | 65990167  | 65990520  | 354 * | 5.69 | 5.06 |
| chr4  | 39977982  | 39978357  | 376 * | 3.14 | 1.34 |
| chr2  | 96658528  | 96659001  | 474 * | 5.05 | 5.58 |
| chr13 | 53806706  | 53806914  | 209 * | 2.01 | 2.85 |
| chr4  | 49120846  | 49121386  | 541 * | 2.91 | 3.69 |
| chr16 | 85336676  | 85337212  | 537 * | 3.22 | 1.34 |
| chr8  | 123691149 | 123691430 | 282 * | 3.17 | 1.43 |
| chr1  | 32254883  | 32255222  | 340 * | 2.73 | 0.63 |
| chr7  | 52156029  | 52156272  | 244 * | 2.73 | 0.63 |
| chr11 | 34813796  | 34813997  | 202 * | 2.82 | 3.57 |
| chr7  | 3937021   | 3937517   | 497 * | 4.33 | 4.9  |
| chr17 | 50675698  | 50676064  | 367 * | 2.31 | 3.08 |
| chr16 | 79084607  | 79084828  | 222 * | 2.32 | 3.13 |
| chr7  | 115807199 | 115807550 | 352 * | 2.89 | 3.64 |
| chr17 | 73422222  | 73422820  | 599 * | 4.92 | 5.42 |
| chr3  | 54985415  | 54985812  | 398 * | 2.92 | 1.08 |
| chr19 | 17606986  | 17607523  | 538 * | 4.24 | 3.18 |
| chr2  | 26214459  | 26214763  | 305 * | 3.95 | 4.56 |
| chr16 | 67011383  | 67011941  | 559 * | 3.94 | 2.73 |
| chr15 | 84049379  | 84049690  | 312 * | 2.67 | 0.63 |
| chr8  | 110294246 | 110294727 | 482 * | 2.67 | 0.63 |
| chr9  | 100161483 | 100161852 | 370 * | 2.88 | 0.63 |
| chr4  | 37133966  | 37134304  | 339 * | 3.19 | 3.89 |
| chr10 | 129514026 | 129514374 | 349 * | 2.67 | 0.63 |
| chr3  | 48545073  | 48545348  | 276 * | 2.67 | 0.63 |
| chr6  | 107957765 | 107958226 | 462 * | 2.67 | 0.63 |
| chr11 | 76518464  | 76518892  | 429 * | 4.18 | 3.13 |
| chr9  | 116559423 | 116559677 | 255 * | 2.72 | 3.5  |
| chr3  | 133142455 | 133142833 | 379 * | 3.02 | 1.34 |
| chr2  | 117267590 | 117268055 | 466 * | 4.02 | 4.64 |
| chr6  | 96267937  | 96268215  | 279 * | 2.87 | 3.62 |
| chr2  | 85358232  | 85358735  | 504 * | 3.99 | 4.62 |
| chr2  | 60777492  | 60777987  | 496 * | 2.67 | 0.63 |
| chr12 | 17962224  | 17962574  | 351 * | 3.4  | 4.07 |
| chr2  | 233198081 | 233198705 | 625 * | 3.19 | 1.43 |
| chr5  | 8394990   | 8395386   | 397 * | 3.63 | 4.29 |



|       |           |           |       |      |      |
|-------|-----------|-----------|-------|------|------|
| chr18 | 75423132  | 75423422  | 291 * | 2.15 | 2.96 |
| chr21 | 9826975   | 9827622   | 648 * | 5.46 | 0.63 |
| chr20 | 43312198  | 43312503  | 306 * | 3.83 | 4.54 |
| chr3  | 86438162  | 86438389  | 228 * | 2.18 | 3    |
| chr1  | 6403507   | 6403909   | 403 * | 4.56 | 3.67 |
| chr7  | 121198427 | 121198759 | 333 * | 2.38 | 3.16 |
| chr4  | 159339915 | 159340185 | 271 * | 2.4  | 3.18 |
| chr16 | 77076890  | 77077351  | 462 * | 2.73 | 3.49 |
| chr10 | 71476679  | 71477206  | 528 * | 3.65 | 2.13 |
| chr6  | 112484527 | 112484841 | 315 * | 2.9  | 1.08 |
| chr3  | 164924428 | 164924841 | 414 * | 2.73 | 0.63 |
| chrX  | 75675054  | 75675391  | 338 * | 3.11 | 3.82 |
| chrX  | 125904223 | 125904559 | 337 * | 2.69 | 0.63 |
| chr3  | 190854161 | 190854528 | 368 * | 3.27 | 3.99 |
| chr11 | 35413818  | 35414100  | 283 * | 2.66 | 0.63 |
| chr5  | 85796819  | 85797067  | 249 * | 2.66 | 0.63 |
| chr13 | 46721070  | 46721409  | 340 * | 2.64 | 0.63 |
| chr22 | 50690626  | 50690901  | 276 * | 2.64 | 0.63 |
| chr2  | 20762314  | 20762710  | 397 * | 2.97 | 3.72 |
| chr2  | 60379372  | 60379708  | 337 * | 2.97 | 3.72 |
| chr15 | 84777531  | 84777812  | 282 * | 2.43 | 3.22 |
| chr7  | 25514032  | 25514500  | 469 * | 2.25 | 3.08 |
| chr13 | 40258694  | 40259002  | 309 * | 2.62 | 3.35 |
| chr9  | 80559808  | 80559981  | 174 * | 2.1  | 2.91 |
| chr9  | 80103473  | 80103880  | 408 * | 4.15 | 4.72 |
| chr14 | 22508548  | 22508794  | 247 * | 2.9  | 1.08 |
| chr19 | 13915672  | 13915967  | 296 * | 2.64 | 0.63 |
| chr12 | 127358763 | 127359291 | 529 * | 3.32 | 4.03 |
| chr9  | 97316703  | 97316913  | 211 * | 2.8  | 3.57 |
| chrX  | 7978130   | 7978525   | 396 * | 3.05 | 3.79 |
| chr10 | 102503346 | 102503701 | 356 * | 2.71 | 0.63 |
| chr4  | 164822189 | 164822782 | 594 * | 2.46 | 3.25 |
| chr10 | 74087776  | 74088320  | 545 * | 3.03 | 1.34 |
| chr15 | 67066582  | 67067157  | 576 * | 5.08 | 4.26 |
| chr9  | 4432285   | 4432559   | 275 * | 2.62 | 3.35 |
| chr12 | 262238    | 262748    | 511 * | 4.63 | 3.78 |
| chr14 | 104274693 | 104275163 | 471 * | 4.47 | 3.5  |
| chr5  | 6820995   | 6821379   | 385 * | 5.05 | 5.51 |
| chr10 | 132053006 | 132053280 | 275 * | 1.77 | 2.63 |
| chr11 | 17434402  | 17434728  | 327 * | 1.77 | 2.63 |
| chr11 | 39480049  | 39480243  | 195 * | 1.77 | 2.63 |
| chr11 | 129150723 | 129151025 | 303 * | 1.77 | 2.63 |
| chr13 | 39391635  | 39391862  | 228 * | 1.77 | 2.63 |

|       |           |           |       |      |      |
|-------|-----------|-----------|-------|------|------|
| chr15 | 34453044  | 34453344  | 301 * | 1.77 | 2.63 |
| chr15 | 38552291  | 38552526  | 236 * | 1.77 | 2.63 |
| chr2  | 172429149 | 172429328 | 180 * | 1.77 | 2.63 |
| chr3  | 40283776  | 40283991  | 216 * | 1.77 | 2.63 |
| chr3  | 40889110  | 40889302  | 193 * | 1.77 | 2.63 |
| chr4  | 122744097 | 122744360 | 264 * | 1.77 | 2.63 |
| chr5  | 79393514  | 79393673  | 160 * | 1.77 | 2.63 |
| chr5  | 143947043 | 143947270 | 228 * | 1.77 | 2.63 |
| chr9  | 26817683  | 26817890  | 208 * | 1.77 | 2.63 |
| chr13 | 40174827  | 40175201  | 375 * | 2.64 | 0.63 |
| chr11 | 103408617 | 103409011 | 395 * | 4.2  | 4.79 |
| chr11 | 103552984 | 103553394 | 411 * | 4.72 | 5.22 |
| chr15 | 74004529  | 74004822  | 294 * | 2.64 | 0.63 |
| chrX  | 105001568 | 105001800 | 233 * | 2.52 | 3.29 |
| chr5  | 58631313  | 58631652  | 340 * | 2.91 | 3.62 |
| chr15 | 57598728  | 57599146  | 419 * | 2.82 | 0.63 |
| chr12 | 130820129 | 130820439 | 311 * | 2.88 | 3.6  |
| chr20 | 49094720  | 49095175  | 456 * | 3.55 | 2.17 |
| chr18 | 55861247  | 55861648  | 402 * | 3.48 | 1.94 |
| chr12 | 39497379  | 39497708  | 330 * | 3.8  | 4.47 |
| chr3  | 103129013 | 103129440 | 428 * | 2.66 | 0.63 |
| chr3  | 139491846 | 139492187 | 342 * | 2.11 | 2.93 |
| chr9  | 102447660 | 102447941 | 282 * | 2.11 | 2.93 |
| chr14 | 44116562  | 44116833  | 272 * | 3.17 | 3.88 |
| chr12 | 6464703   | 6465025   | 323 * | 3.31 | 1.7  |
| chr1  | 38826497  | 38826794  | 298 * | 2.64 | 0.63 |
| chr15 | 27083902  | 27084206  | 305 * | 2.64 | 0.63 |
| chr8  | 52438590  | 52438998  | 409 * | 2.64 | 0.63 |
| chr1  | 4886138   | 4886428   | 291 * | 3.5  | 4.22 |
| chr1  | 114519459 | 114519903 | 445 * | 2.96 | 3.7  |
| chr7  | 11371407  | 11371661  | 255 * | 2.02 | 2.82 |
| chr12 | 109831448 | 109831936 | 489 * | 5.2  | 5.68 |
| chr15 | 65325374  | 65325866  | 493 * | 5.07 | 4.3  |
| chr8  | 6792330   | 6792767   | 438 * | 3.49 | 4.23 |
| chr12 | 94496026  | 94496332  | 307 * | 3.3  | 1.81 |
| chr17 | 75910848  | 75911104  | 257 * | 3.3  | 1.81 |
| chr1  | 52515651  | 52515927  | 277 * | 1.75 | 2.61 |
| chr21 | 31277248  | 31277462  | 215 * | 1.75 | 2.61 |
| chr4  | 166267250 | 166267436 | 187 * | 1.75 | 2.61 |
| chr6  | 63158957  | 63159248  | 292 * | 1.75 | 2.61 |
| chr8  | 83960967  | 83961388  | 422 * | 1.75 | 2.61 |
| chr8  | 139084135 | 139084452 | 318 * | 1.75 | 2.61 |
| chr9  | 122429460 | 122429753 | 294 * | 1.75 | 2.61 |

|       |           |           |       |      |      |
|-------|-----------|-----------|-------|------|------|
| chr9  | 103938630 | 103938988 | 359 * | 3.25 | 3.99 |
| chr2  | 116815095 | 116815447 | 353 * | 2.24 | 3.04 |
| chr1  | 173660379 | 173660569 | 191 * | 2.26 | 3.06 |
| chr1  | 18812689  | 18813406  | 718 * | 3.65 | 2.34 |
| chr1  | 246166242 | 246166885 | 644 * | 4.33 | 4.9  |
| chr11 | 87589191  | 87589562  | 372 * | 4.14 | 4.72 |
| chr12 | 114256623 | 114256994 | 372 * | 3.83 | 2.6  |
| chr6  | 78330071  | 78330405  | 335 * | 4.01 | 4.63 |
| chr1  | 171236079 | 171236462 | 384 * | 2.62 | 0.63 |
| chr10 | 104299796 | 104300146 | 351 * | 2.62 | 0.63 |
| chr16 | 67875643  | 67875939  | 297 * | 2.62 | 0.63 |
| chr2  | 95955107  | 95955340  | 234 * | 2.62 | 0.63 |
| chr11 | 66346473  | 66346877  | 405 * | 4.07 | 2.9  |
| chr19 | 13345317  | 13345723  | 407 * | 4.07 | 2.9  |
| chr5  | 79220808  | 79221155  | 348 * | 3.29 | 1.81 |
| chr1  | 47000553  | 47001077  | 525 * | 2.64 | 0.63 |
| chr11 | 103209899 | 103210214 | 316 * | 2.64 | 0.63 |
| chr8  | 91013084  | 91013370  | 287 * | 2.66 | 0.63 |
| chrX  | 97703620  | 97703955  | 336 * | 2.66 | 0.63 |
| chr4  | 61066832  | 61067272  | 441 * | 4.68 | 5.22 |
| chr4  | 169104919 | 169105320 | 402 * | 4.33 | 4.88 |
| chr1  | 97307739  | 97308189  | 451 * | 3.1  | 1.43 |
| chr4  | 59960285  | 59960603  | 319 * | 2.71 | 3.43 |
| chr12 | 9202080   | 9202576   | 497 * | 2.62 | 0.63 |
| chr18 | 63455677  | 63456183  | 507 * | 2.05 | 2.85 |
| chr5  | 138473427 | 138473990 | 564 * | 2.85 | 3.63 |
| chr3  | 119963043 | 119963659 | 617 * | 4.44 | 5.01 |
| chr11 | 12599876  | 12600156  | 281 * | 2.5  | 3.27 |
| chrX  | 117360042 | 117360384 | 343 * | 2.9  | 1.08 |
| chr20 | 25450719  | 25451062  | 344 * | 3.3  | 1.81 |
| chr12 | 12044980  | 12045226  | 247 * | 2.69 | 3.41 |
| chr18 | 24201324  | 24201866  | 543 * | 2.65 | 0.63 |
| chr20 | 3474983   | 3475184   | 202 * | 1.93 | 2.76 |
| chr1  | 41239748  | 41240358  | 611 * | 3.74 | 2.31 |
| chrX  | 151511788 | 151512069 | 282 * | 3.08 | 3.8  |
| chr1  | 77153118  | 77153386  | 269 * | 1.72 | 2.57 |
| chr12 | 86769954  | 86770116  | 163 * | 1.72 | 2.57 |
| chr12 | 130102490 | 130102735 | 246 * | 1.72 | 2.57 |
| chr12 | 130499047 | 130499266 | 220 * | 1.72 | 2.57 |
| chr16 | 33967996  | 33968298  | 303 * | 1.72 | 2.57 |
| chr18 | 75640145  | 75640371  | 227 * | 1.72 | 2.57 |
| chr2  | 43441377  | 43441579  | 203 * | 1.72 | 2.57 |
| chr3  | 69477554  | 69477999  | 446 * | 1.72 | 2.57 |

|       |           |           |       |      |      |
|-------|-----------|-----------|-------|------|------|
| chr7  | 14486702  | 14486913  | 212 * | 1.72 | 2.57 |
| chr7  | 48930960  | 48931161  | 202 * | 1.72 | 2.57 |
| chr7  | 144731626 | 144731890 | 265 * | 1.72 | 2.57 |
| chr8  | 34501501  | 34501834  | 334 * | 1.72 | 2.57 |
| chrX  | 25460709  | 25460900  | 192 * | 1.72 | 2.57 |
| chrX  | 61732706  | 61732892  | 187 * | 1.72 | 2.57 |
| chr11 | 132149135 | 132149562 | 428 * | 2.62 | 0.63 |
| chr3  | 14190096  | 14190551  | 456 * | 4.07 | 2.9  |
| chr17 | 61912168  | 61912825  | 658 * | 3.67 | 2.13 |
| chr11 | 2216168   | 2216396   | 229 * | 2.69 | 0.63 |
| chr22 | 43742401  | 43742754  | 354 * | 2.69 | 0.63 |
| chr2  | 30893424  | 30893665  | 242 * | 2.22 | 3.01 |
| chr10 | 47644875  | 47645142  | 268 * | 2.77 | 3.48 |
| chr9  | 98506504  | 98506922  | 419 * | 2.77 | 3.48 |
| chr19 | 40030781  | 40031083  | 303 * | 2.96 | 1.08 |
| chrX  | 28719351  | 28719615  | 265 * | 2.29 | 3.06 |
| chr22 | 39162033  | 39162608  | 576 * | 3.75 | 2.46 |
| chr2  | 130693853 | 130694300 | 448 * | 2.48 | 3.25 |
| chr7  | 150475450 | 150476198 | 749 * | 5.04 | 5.51 |
| chr6  | 15058638  | 15059036  | 399 * | 2.71 | 3.49 |
| chr6  | 91877612  | 91877956  | 345 * | 3.32 | 4    |
| chr3  | 68498158  | 68498483  | 326 * | 3.37 | 4.07 |
| chr7  | 73140097  | 73140381  | 285 * | 3.88 | 2.73 |
| chr10 | 6880053   | 6880485   | 433 * | 2.62 | 0.63 |
| chr4  | 89580441  | 89581001  | 561 * | 4.46 | 5    |
| chr10 | 89877906  | 89878392  | 487 * | 4.19 | 4.77 |
| chr11 | 18166514  | 18166904  | 391 * | 2.93 | 3.67 |
| chr14 | 94754995  | 94755335  | 341 * | 2.93 | 3.67 |
| chr4  | 175795170 | 175795536 | 367 * | 3.55 | 4.2  |
| chr6  | 149511406 | 149511816 | 411 * | 3.99 | 4.59 |
| chr19 | 46425693  | 46426196  | 504 * | 3.78 | 4.45 |
| chr11 | 14396573  | 14396805  | 233 * | 2.88 | 3.58 |
| chr16 | 30420679  | 30421104  | 426 * | 4.7  | 3.81 |
| chr1  | 66902063  | 66902335  | 273 * | 3.46 | 4.13 |
| chr11 | 73642304  | 73642830  | 527 * | 2.96 | 1.34 |
| chr1  | 31867357  | 31867885  | 529 * | 2.8  | 0.63 |
| chr15 | 89985994  | 89986291  | 298 * | 3.73 | 2.46 |
| chr21 | 21943273  | 21943620  | 348 * | 3.01 | 3.72 |
| chr10 | 71152221  | 71152636  | 416 * | 3.88 | 2.73 |
| chr18 | 72956281  | 72956554  | 274 * | 2.37 | 3.15 |
| chr3  | 167806228 | 167806525 | 298 * | 3.48 | 4.14 |
| chr2  | 105028802 | 105029211 | 410 * | 4.57 | 5.11 |
| chr13 | 42790205  | 42790639  | 435 * | 4.29 | 4.89 |

|       |           |           |        |      |      |
|-------|-----------|-----------|--------|------|------|
| chr12 | 6532685   | 6533077   | 393 *  | 3.89 | 2.73 |
| chr8  | 108920568 | 108921174 | 607 *  | 4.58 | 5.11 |
| chr6  | 34941342  | 34941593  | 252 *  | 2.61 | 3.37 |
| chr15 | 32971627  | 32972198  | 572 *  | 2    | 2.79 |
| chr7  | 92722021  | 92722412  | 392 *  | 4.24 | 4.81 |
| chr1  | 40265349  | 40265637  | 289 *  | 2.59 | 0.63 |
| chr19 | 42363569  | 42363978  | 410 *  | 2.59 | 0.63 |
| chr9  | 130887225 | 130887654 | 430 *  | 4.31 | 3.24 |
| chr13 | 66252110  | 66252490  | 381 *  | 2.5  | 3.24 |
| chrX  | 49148389  | 49148819  | 431 *  | 3.42 | 2.03 |
| chr12 | 48195017  | 48195214  | 198 *  | 2.04 | 2.85 |
| chr2  | 150343576 | 150343885 | 310 *  | 2.04 | 2.85 |
| chr1  | 93088758  | 93089073  | 316 *  | 2.59 | 0.63 |
| chr5  | 45797107  | 45797357  | 251 *  | 2.84 | 3.58 |
| chr3  | 6246707   | 6246898   | 192 *  | 2.25 | 3.01 |
| chr1  | 57483365  | 57483761  | 397 *  | 4.28 | 4.84 |
| chr12 | 111374767 | 111375237 | 471 *  | 2.62 | 0.63 |
| chrX  | 135282557 | 135282945 | 389 *  | 3.61 | 2.13 |
| chrX  | 106568263 | 106568750 | 488 *  | 3.63 | 2.34 |
| chr7  | 114062523 | 114062840 | 318 *  | 2.59 | 0.63 |
| chr13 | 101797186 | 101797501 | 316 *  | 4.19 | 4.76 |
| chr13 | 54879600  | 54879816  | 217 *  | 3.02 | 3.75 |
| chr11 | 47182541  | 47182905  | 365 *  | 4.18 | 3.08 |
| chr19 | 58740720  | 58740960  | 241 *  | 2.64 | 0.63 |
| chr3  | 104397300 | 104397548 | 249 *  | 2.07 | 2.88 |
| chr9  | 104473653 | 104473965 | 313 *  | 4.69 | 5.19 |
| chr14 | 66869976  | 66870286  | 311 *  | 3.85 | 4.48 |
| chr19 | 49934045  | 49934326  | 282 *  | 2.94 | 1.34 |
| chr5  | 90162172  | 90162637  | 466 *  | 2.56 | 3.33 |
| chr20 | 45211434  | 45211653  | 220 *  | 2.81 | 3.55 |
| chr15 | 45490896  | 45491405  | 510 *  | 3    | 1.34 |
| chr6  | 33553464  | 33553793  | 330 *  | 3.54 | 2.17 |
| chr11 | 112426477 | 112426891 | 415 *  | 3.53 | 2.17 |
| chr10 | 99663499  | 99663759  | 261 *  | 2.59 | 0.63 |
| chr6  | 91188090  | 91188451  | 362 *  | 2.59 | 0.63 |
| chr10 | 69417568  | 69417927  | 360 *  | 2.81 | 3.55 |
| chr6  | 110016595 | 110017182 | 588 *  | 4.11 | 4.77 |
| chr10 | 35790936  | 35791229  | 294 *  | 1.91 | 2.74 |
| chr3  | 33266141  | 33266597  | 457 *  | 1.91 | 2.74 |
| chr22 | 30085886  | 30086200  | 315 *  | 3.59 | 2.13 |
| chr17 | 40219128  | 40220243  | 1116 * | 5.29 | 4.65 |
| chrX  | 15484408  | 15484774  | 367 *  | 2.94 | 1.34 |
| chr13 | 31155663  | 31155994  | 332 *  | 2.6  | 0.63 |

|       |           |           |       |      |      |
|-------|-----------|-----------|-------|------|------|
| chr7  | 152091406 | 152091632 | 227 * | 2.29 | 3.06 |
| chr11 | 12068937  | 12069312  | 376 * | 3.25 | 1.81 |
| chr1  | 38325787  | 38326271  | 485 * | 4.12 | 2.9  |
| chr11 | 45254834  | 45255318  | 485 * | 4.13 | 3.13 |
| chr22 | 35979026  | 35979448  | 423 * | 4.37 | 3.46 |
| chr2  | 97626154  | 97626466  | 313 * | 4.28 | 3.26 |
| chr13 | 53542129  | 53542576  | 448 * | 5.37 | 4.72 |
| chr1  | 26070530  | 26070906  | 377 * | 2.62 | 0.63 |
| chr2  | 12313748  | 12314015  | 268 * | 2.54 | 3.28 |
| chr11 | 128647512 | 128647851 | 340 * | 2.86 | 1.08 |
| chr9  | 130680641 | 130680922 | 282 * | 2.61 | 0.63 |
| chr11 | 111704271 | 111704629 | 359 * | 2.84 | 1.08 |
| chr3  | 187036529 | 187036994 | 466 * | 4.78 | 5.28 |
| chr6  | 115987223 | 115987428 | 206 * | 2.72 | 3.44 |
| chr2  | 46877685  | 46878004  | 320 * | 4.52 | 5.04 |
| chr12 | 126554097 | 126554373 | 277 * | 2.48 | 3.24 |
| chr2  | 71384512  | 71384908  | 397 * | 3.52 | 2.17 |
| chr4  | 87712341  | 87712633  | 293 * | 2.59 | 0.63 |
| chr3  | 184894586 | 184894948 | 363 * | 3.25 | 3.94 |
| chr3  | 149901974 | 149902418 | 445 * | 3.07 | 1.43 |
| chr6  | 50152737  | 50153168  | 432 * | 3.81 | 4.43 |
| chr2  | 154019607 | 154019944 | 338 * | 4.38 | 4.92 |
| chr18 | 75414711  | 75414991  | 281 * | 2.47 | 3.26 |
| chr2  | 104455478 | 104455739 | 262 * | 2.47 | 3.26 |
| chr14 | 75372369  | 75373052  | 684 * | 4.16 | 3.08 |
| chr1  | 220986334 | 220986664 | 331 * | 2.57 | 0.63 |
| chr5  | 1763684   | 1764078   | 395 * | 2.57 | 0.63 |
| chr20 | 44615946  | 44616215  | 270 * | 3.27 | 1.81 |
| chr13 | 53772256  | 53772460  | 205 * | 2.64 | 0.63 |
| chr17 | 43462710  | 43463291  | 582 * | 4.55 | 3.72 |
| chr10 | 129772257 | 129772489 | 233 * | 3.14 | 1.63 |
| chr8  | 142044584 | 142044929 | 346 * | 3.15 | 1.63 |
| chr10 | 45485874  | 45486210  | 337 * | 2.57 | 0.63 |
| chr12 | 118041614 | 118041951 | 338 * | 2.57 | 0.63 |
| chr14 | 73750705  | 73751010  | 306 * | 2.57 | 0.63 |
| chr22 | 23152480  | 23152830  | 351 * | 2.57 | 0.63 |
| chr8  | 136774295 | 136774770 | 476 * | 2.57 | 0.63 |
| chr10 | 123583456 | 123584025 | 570 * | 4.16 | 4.73 |
| chr13 | 107173022 | 107173252 | 231 * | 2.25 | 3.01 |
| chr16 | 58790254  | 58790733  | 480 * | 3.78 | 2.53 |
| chr16 | 8424081   | 8424369   | 289 * | 2.93 | 3.69 |
| chr9  | 97878255  | 97878711  | 457 * | 4.43 | 4.95 |
| chr1  | 160016305 | 160016895 | 591 * | 3.88 | 2.69 |

|       |           |           |       |      |      |
|-------|-----------|-----------|-------|------|------|
| chr6  | 153874550 | 153875252 | 703 * | 4.54 | 5.05 |
| chr12 | 121441407 | 121441922 | 516 * | 2.57 | 0.63 |
| chr15 | 86837075  | 86837302  | 228 * | 2.05 | 2.9  |
| chr9  | 77192976  | 77193274  | 299 * | 3.94 | 4.56 |
| chr16 | 58066158  | 58066564  | 407 * | 3.72 | 2.43 |
| chr5  | 32942546  | 32943116  | 571 * | 2.89 | 3.63 |
| chr5  | 132082593 | 132082871 | 279 * | 4.47 | 4.99 |
| chr11 | 90275291  | 90275543  | 253 * | 2.2  | 2.98 |
| chr16 | 13425865  | 13426155  | 291 * | 2.2  | 2.98 |
| chr21 | 43887436  | 43887777  | 342 * | 2.57 | 0.63 |
| chrX  | 135793386 | 135793665 | 280 * | 3.07 | 1.43 |
| chr2  | 99185655  | 99186065  | 411 * | 3.73 | 2.46 |
| chr22 | 40543352  | 40543709  | 358 * | 4.94 | 5.42 |
| chr2  | 79268095  | 79268671  | 577 * | 4.23 | 4.8  |
| chr17 | 71425561  | 71425940  | 380 * | 3.53 | 2.17 |
| chr4  | 149625451 | 149625943 | 493 * | 4.09 | 4.66 |
| chr15 | 74614792  | 74615229  | 438 * | 3.51 | 2.17 |
| chr2  | 239152454 | 239152670 | 217 * | 2.54 | 3.28 |
| chr22 | 45478670  | 45479079  | 410 * | 3.93 | 2.81 |
| chr2  | 49271741  | 49272227  | 487 * | 3.31 | 3.98 |
| chr19 | 11784341  | 11784776  | 436 * | 4.53 | 3.67 |
| chr6  | 54582574  | 54583022  | 449 * | 3.87 | 4.47 |
| chr1  | 196866692 | 196866897 | 206 * | 1.68 | 2.53 |
| chr11 | 18690110  | 18690382  | 273 * | 1.68 | 2.53 |
| chr11 | 95553855  | 95554229  | 375 * | 1.68 | 2.53 |
| chr13 | 20986870  | 20987135  | 266 * | 1.68 | 2.53 |
| chr13 | 49049347  | 49049600  | 254 * | 1.68 | 2.53 |
| chr13 | 109860100 | 109860259 | 160 * | 1.68 | 2.53 |
| chr14 | 99351433  | 99351700  | 268 * | 1.68 | 2.53 |
| chr15 | 39804987  | 39805346  | 360 * | 1.68 | 2.53 |
| chr16 | 6347760   | 6347928   | 169 * | 1.68 | 2.53 |
| chr17 | 37646574  | 37646755  | 182 * | 1.68 | 2.53 |
| chr18 | 9141739   | 9141913   | 175 * | 1.68 | 2.53 |
| chr2  | 52466008  | 52466313  | 306 * | 1.68 | 2.53 |
| chr2  | 52935126  | 52935469  | 344 * | 1.68 | 2.53 |
| chr2  | 157410502 | 157410874 | 373 * | 1.68 | 2.53 |
| chr4  | 95005040  | 95005210  | 171 * | 1.68 | 2.53 |
| chr6  | 33535893  | 33536125  | 233 * | 1.68 | 2.53 |
| chr6  | 38247209  | 38247475  | 267 * | 1.68 | 2.53 |
| chr7  | 7653654   | 7653846   | 193 * | 1.68 | 2.53 |
| chr7  | 82445631  | 82445851  | 221 * | 1.68 | 2.53 |
| chr7  | 112466826 | 112467024 | 199 * | 1.68 | 2.53 |
| chr7  | 124275596 | 124275787 | 192 * | 1.68 | 2.53 |

|       |           |           |       |      |      |
|-------|-----------|-----------|-------|------|------|
| chr9  | 28394088  | 28394316  | 229 * | 1.68 | 2.53 |
| chr9  | 88015903  | 88016105  | 203 * | 1.68 | 2.53 |
| chr9  | 107850759 | 107851188 | 430 * | 1.68 | 2.53 |
| chr19 | 741657    | 741848    | 192 * | 3.11 | 3.8  |
| chr13 | 72453376  | 72453724  | 349 * | 4.11 | 4.68 |
| chr17 | 74502486  | 74502849  | 364 * | 3.5  | 2.17 |
| chr6  | 136080987 | 136081354 | 368 * | 3.3  | 3.97 |
| chr19 | 58518651  | 58519131  | 481 * | 3.9  | 2.61 |
| chr2  | 144610281 | 144610679 | 399 * | 2.57 | 0.63 |
| chr2  | 238330125 | 238330530 | 406 * | 2.57 | 0.63 |
| chr4  | 6909500   | 6909887   | 388 * | 2.57 | 0.63 |
| chr5  | 41856780  | 41857083  | 304 * | 4.35 | 4.88 |
| chr5  | 156739437 | 156739866 | 430 * | 3.66 | 4.29 |
| chr8  | 102482707 | 102482919 | 213 * | 2.66 | 3.42 |
| chr5  | 123296944 | 123297408 | 465 * | 2.91 | 3.62 |
| chr17 | 66907797  | 66908261  | 465 * | 4.23 | 4.78 |
| chr7  | 52235761  | 52236223  | 463 * | 4.72 | 5.26 |
| chr10 | 7302403   | 7302707   | 305 * | 3.5  | 4.16 |
| chrX  | 56810074  | 56810327  | 254 * | 2.41 | 3.19 |
| chr2  | 188707923 | 188708259 | 337 * | 3.51 | 4.18 |
| chr4  | 22963993  | 22964416  | 424 * | 3.66 | 4.31 |
| chr6  | 8481957   | 8482345   | 389 * | 3.22 | 3.89 |
| chr22 | 31030332  | 31030806  | 475 * | 3.78 | 2.6  |
| chr2  | 51732611  | 51733000  | 390 * | 3.25 | 3.97 |
| chr1  | 5700947   | 5701250   | 304 * | 2.8  | 3.53 |
| chr8  | 58026192  | 58026559  | 368 * | 2.82 | 1.08 |
| chr13 | 99828819  | 99829285  | 467 * | 4.23 | 3.28 |
| chr13 | 85145451  | 85145840  | 390 * | 3.22 | 3.95 |
| chr10 | 7343436   | 7343755   | 320 * | 2.23 | 2.98 |
| chr3  | 5288448   | 5288698   | 251 * | 2.23 | 2.98 |
| chr8  | 33240582  | 33241036  | 455 * | 3.55 | 4.2  |
| chr2  | 82121752  | 82122023  | 272 * | 2.11 | 2.93 |
| chr15 | 82395902  | 82396254  | 353 * | 2.57 | 0.63 |
| chr6  | 4920625   | 4920896   | 272 * | 2.57 | 0.63 |
| chr7  | 73021337  | 73021643  | 307 * | 2.57 | 0.63 |
| chr7  | 154490502 | 154490731 | 230 * | 2.33 | 3.1  |
| chr15 | 61994762  | 61995163  | 402 * | 2.54 | 0.63 |
| chr8  | 97295087  | 97295460  | 374 * | 3.33 | 4.07 |
| chr1  | 220699717 | 220699960 | 244 * | 2.54 | 0.63 |
| chr8  | 17637377  | 17637765  | 389 * | 2.54 | 0.63 |
| chr18 | 75445278  | 75445578  | 301 * | 2.46 | 3.23 |
| chr8  | 93081376  | 93081725  | 350 * | 2.51 | 3.28 |
| chr21 | 31444860  | 31445165  | 306 * | 2.9  | 1.34 |



|       |           |           |       |      |      |
|-------|-----------|-----------|-------|------|------|
| chr1  | 17011373  | 17011655  | 283 * | 2.44 | 3.2  |
| chr2  | 101505671 | 101505895 | 225 * | 2.44 | 3.2  |
| chr3  | 55468691  | 55469091  | 401 * | 4.22 | 4.78 |
| chr18 | 74517130  | 74517526  | 397 * | 2.05 | 2.85 |
| chr4  | 130848145 | 130848431 | 287 * | 2.05 | 2.85 |
| chr1  | 1311710   | 1312046   | 337 * | 2.54 | 0.63 |
| chr19 | 7004290   | 7004651   | 362 * | 2.54 | 0.63 |
| chr7  | 92861061  | 92861294  | 234 * | 2.54 | 0.63 |
| chr11 | 28719496  | 28719831  | 336 * | 3.76 | 4.39 |
| chr14 | 57153303  | 57153626  | 324 * | 2.54 | 0.63 |
| chr16 | 55068947  | 55069276  | 330 * | 3.84 | 4.46 |
| chr2  | 120963849 | 120964298 | 450 * | 3.91 | 2.69 |
| chr8  | 87905123  | 87905490  | 368 * | 5.08 | 5.52 |
| chr1  | 112050889 | 112051152 | 264 * | 3.45 | 2.08 |
| chr6  | 33086341  | 33086719  | 379 * | 4.22 | 4.77 |
| chr18 | 74559957  | 74560213  | 257 * | 2.32 | 3.08 |
| chr2  | 120399159 | 120399486 | 328 * | 3.89 | 2.61 |
| chr2  | 191184558 | 191185029 | 472 * | 3.46 | 1.94 |
| chr5  | 9922911   | 9923291   | 381 * | 3.57 | 4.27 |
| chr20 | 37897622  | 37898105  | 484 * | 3.7  | 2.46 |
| chr13 | 28633403  | 28633758  | 356 * | 3.31 | 1.88 |
| chr6  | 41196357  | 41196688  | 332 * | 3.05 | 1.43 |
| chr5  | 141071701 | 141072061 | 361 * | 2.61 | 0.63 |
| chr2  | 172968652 | 172968875 | 224 * | 2.88 | 1.08 |
| chr12 | 38778462  | 38778769  | 308 * | 3.01 | 3.7  |
| chr16 | 14343400  | 14343747  | 348 * | 4.58 | 5.09 |
| chr17 | 73649000  | 73649481  | 482 * | 3.69 | 2.46 |
| chr8  | 117920192 | 117920727 | 536 * | 2.54 | 0.63 |
| chr12 | 77500975  | 77501286  | 312 * | 1.85 | 2.67 |
| chr2  | 76851630  | 76851900  | 271 * | 1.85 | 2.67 |
| chrX  | 88836934  | 88837124  | 191 * | 1.85 | 2.67 |
| chr3  | 97907420  | 97907751  | 332 * | 2.54 | 0.63 |
| chr16 | 68470531  | 68471050  | 520 * | 3.15 | 3.87 |
| chr4  | 112727552 | 112727827 | 276 * | 2.8  | 1.08 |
| chr1  | 28266875  | 28267191  | 317 * | 2.8  | 1.08 |
| chr14 | 91604838  | 91605195  | 358 * | 4.29 | 4.85 |
| chrX  | 27204760  | 27205205  | 446 * | 3.42 | 4.13 |
| chr5  | 178266406 | 178266670 | 265 * | 3.1  | 1.63 |
| chr7  | 32246624  | 32246960  | 337 * | 3.1  | 1.63 |
| chr17 | 50674877  | 50675043  | 167 * | 1.97 | 2.76 |
| chr17 | 40825870  | 40826348  | 479 * | 2.56 | 0.63 |
| chr16 | 85449951  | 85450384  | 434 * | 3.25 | 1.7  |
| chr11 | 120503327 | 120503669 | 343 * | 3.17 | 3.85 |

|       |           |           |       |      |      |
|-------|-----------|-----------|-------|------|------|
| chr20 | 25650870  | 25651145  | 276 * | 2.44 | 3.24 |
| chr15 | 46082519  | 46082856  | 338 * | 3.09 | 3.8  |
| chr4  | 76837076  | 76837656  | 581 * | 4.45 | 4.97 |
| chr15 | 78202693  | 78203385  | 693 * | 4.86 | 4.08 |
| chr1  | 110333508 | 110333795 | 288 * | 3.43 | 2.03 |
| chr10 | 126254386 | 126254694 | 309 * | 2.54 | 0.63 |
| chr19 | 57988936  | 57989275  | 340 * | 2.54 | 0.63 |
| chr5  | 100926045 | 100926493 | 449 * | 3.01 | 3.72 |
| chr22 | 39955779  | 39956158  | 380 * | 2.9  | 1.34 |
| chr11 | 125549434 | 125549688 | 255 * | 1.74 | 2.6  |
| chr12 | 126728434 | 126728644 | 211 * | 1.74 | 2.6  |
| chr12 | 128675152 | 128675418 | 267 * | 1.74 | 2.6  |
| chr13 | 26426540  | 26426796  | 257 * | 1.74 | 2.6  |
| chr13 | 78099381  | 78099638  | 258 * | 1.74 | 2.6  |
| chr2  | 120746872 | 120747085 | 214 * | 1.74 | 2.6  |
| chr22 | 48399819  | 48400050  | 232 * | 1.74 | 2.6  |
| chr8  | 139889154 | 139889366 | 213 * | 1.74 | 2.6  |
| chr6  | 693388    | 693765    | 378 * | 3.22 | 1.81 |
| chr19 | 59031428  | 59031987  | 560 * | 2.66 | 0.63 |
| chr5  | 160397760 | 160398183 | 424 * | 2.93 | 3.67 |
| chr16 | 20394805  | 20395252  | 448 * | 4.56 | 5.06 |
| chrX  | 130760811 | 130761252 | 442 * | 4.69 | 5.19 |
| chr10 | 54074217  | 54074495  | 279 * | 2.39 | 3.17 |
| chr11 | 28551103  | 28551552  | 450 * | 3.21 | 3.92 |
| chr22 | 33190502  | 33190883  | 382 * | 2.81 | 3.52 |
| chr13 | 32738815  | 32739188  | 374 * | 4.64 | 5.15 |
| chr1  | 160633180 | 160633501 | 322 * | 2.35 | 3.13 |
| chr11 | 64046759  | 64047041  | 283 * | 2.35 | 3.13 |
| chr9  | 80729761  | 80730411  | 651 * | 4.86 | 5.32 |
| chr11 | 11988367  | 11988746  | 380 * | 4.46 | 3.63 |
| chr1  | 35012528  | 35013006  | 479 * | 4.33 | 4.87 |
| chr1  | 156449718 | 156450037 | 320 * | 2.23 | 2.98 |
| chr1  | 49335229  | 49335676  | 448 * | 3.97 | 4.54 |
| chr2  | 232578555 | 232579038 | 484 * | 3.68 | 2.46 |
| chr7  | 121203338 | 121203567 | 230 * | 2.27 | 3.03 |
| chr7  | 142023359 | 142023766 | 408 * | 2.92 | 1.34 |
| chr2  | 51651623  | 51652011  | 389 * | 2.44 | 3.19 |
| chr1  | 9675638   | 9675968   | 331 * | 3.84 | 2.73 |
| chr1  | 110074911 | 110075344 | 434 * | 3.84 | 2.73 |
| chr3  | 73046794  | 73047154  | 361 * | 2.52 | 0.63 |
| chr14 | 96692211  | 96692468  | 258 * | 2.7  | 3.42 |
| chr10 | 65484713  | 65485078  | 366 * | 2.7  | 3.44 |
| chr2  | 59252294  | 59252815  | 522 * | 4.31 | 3.42 |

|       |           |           |       |      |      |
|-------|-----------|-----------|-------|------|------|
| chr19 | 40404204  | 40404468  | 265 * | 3.54 | 2.13 |
| chr14 | 29691909  | 29692194  | 286 * | 2.52 | 0.63 |
| chr2  | 172783178 | 172783340 | 163 * | 2.42 | 3.18 |
| chr17 | 77948631  | 77949107  | 477 * | 4.05 | 3    |
| chr11 | 69536526  | 69536869  | 344 * | 2.54 | 0.63 |
| chr13 | 52371894  | 52372188  | 295 * | 2.54 | 0.63 |
| chr1  | 25174458  | 25174731  | 274 * | 2.56 | 0.63 |
| chr22 | 40832569  | 40833324  | 756 * | 2.56 | 0.63 |
| chr7  | 158200676 | 158201026 | 351 * | 2.56 | 0.63 |
| chr11 | 129793182 | 129793528 | 347 * | 4.21 | 4.78 |
| chr2  | 25048838  | 25049359  | 522 * | 2.51 | 0.63 |
| chr5  | 164924634 | 164925116 | 483 * | 2.51 | 0.63 |
| chrX  | 20085270  | 20085678  | 409 * | 2.51 | 0.63 |
| chrX  | 39916701  | 39916976  | 276 * | 2.51 | 0.63 |
| chr19 | 9958802   | 9959311   | 510 * | 2.61 | 0.63 |
| chrX  | 106242088 | 106242419 | 332 * | 2.79 | 3.5  |
| chr19 | 31276619  | 31277164  | 546 * | 2.63 | 3.36 |
| chr2  | 43804404  | 43804950  | 547 * | 5.34 | 5.82 |
| chr3  | 43880410  | 43880814  | 405 * | 2.97 | 3.67 |
| chr13 | 51644206  | 51644543  | 338 * | 3.09 | 1.63 |
| chr2  | 115735448 | 115735656 | 209 * | 2.48 | 3.25 |
| chr17 | 26124456  | 26124723  | 268 * | 2.52 | 0.63 |
| chr11 | 67415546  | 67415910  | 365 * | 3.24 | 1.81 |
| chr5  | 102309856 | 102310183 | 328 * | 2.53 | 3.24 |
| chr21 | 21354316  | 21354566  | 251 * | 2.34 | 3.08 |
| chr1  | 91852692  | 91853124  | 433 * | 4.93 | 0.63 |
| chr21 | 15492386  | 15492804  | 419 * | 3.22 | 1.7  |
| chr5  | 109026740 | 109027117 | 378 * | 3.21 | 1.81 |
| chr12 | 49318283  | 49318692  | 410 * | 2.51 | 0.63 |
| chr5  | 153921300 | 153921580 | 281 * | 2.51 | 0.63 |
| chr22 | 34192453  | 34192856  | 404 * | 3.85 | 4.49 |
| chr18 | 21993121  | 21993541  | 421 * | 4.31 | 4.85 |
| chr9  | 91615939  | 91616286  | 348 * | 2.59 | 0.63 |
| chr2  | 192163830 | 192164118 | 289 * | 3.04 | 3.74 |
| chr7  | 105817161 | 105817505 | 345 * | 3.99 | 2.9  |
| chr4  | 110971077 | 110971487 | 411 * | 4.27 | 4.86 |
| chr2  | 17081454  | 17082052  | 599 * | 6.07 | 6.51 |
| chr3  | 111855825 | 111856319 | 495 * | 4.62 | 5.14 |
| chr5  | 60653598  | 60654013  | 416 * | 3.71 | 4.34 |
| chr13 | 39104754  | 39104976  | 223 * | 2.18 | 2.96 |
| chr14 | 30655019  | 30655367  | 349 * | 2.18 | 2.96 |
| chr15 | 42508470  | 42508994  | 525 * | 2.18 | 2.96 |
| chr3  | 188001177 | 188001477 | 301 * | 2.18 | 2.96 |

|       |           |           |       |      |      |
|-------|-----------|-----------|-------|------|------|
| chr4  | 49152396  | 49153065  | 670 * | 2.18 | 2.96 |
| chr1  | 149192760 | 149193067 | 308 * | 3.19 | 1.81 |
| chr8  | 125601638 | 125601953 | 316 * | 4.03 | 2.9  |
| chr20 | 48785816  | 48786319  | 504 * | 4.44 | 4.98 |
| chr11 | 662742    | 663036    | 295 * | 3.25 | 1.81 |
| chr8  | 6188789   | 6189120   | 332 * | 2.52 | 0.63 |
| chr11 | 70660983  | 70661409  | 427 * | 3.51 | 2.17 |
| chr17 | 56277465  | 56277785  | 321 * | 2.54 | 0.63 |
| chr2  | 70613072  | 70613428  | 357 * | 2.54 | 0.63 |
| chr3  | 72636457  | 72636905  | 449 * | 2.54 | 0.63 |
| chr17 | 42610855  | 42611193  | 339 * | 3.2  | 1.81 |
| chr9  | 119351649 | 119352176 | 528 * | 6.08 | 6.46 |
| chr3  | 68915272  | 68915634  | 363 * | 3.38 | 4.03 |
| chr19 | 45113827  | 45114109  | 283 * | 2.87 | 3.57 |
| chr19 | 7846056   | 7846373   | 318 * | 2.51 | 0.63 |
| chr5  | 176809707 | 176809977 | 271 * | 2.51 | 0.63 |
| chr5  | 165768749 | 165769134 | 386 * | 3.09 | 3.75 |
| chr6  | 163541316 | 163541559 | 244 * | 3.07 | 3.75 |
| chr9  | 101127343 | 101127833 | 491 * | 1.95 | 2.74 |
| chr10 | 60400982  | 60401339  | 358 * | 1.92 | 2.7  |
| chr12 | 17357317  | 17357552  | 236 * | 1.92 | 2.7  |
| chr6  | 50348774  | 50349213  | 440 * | 4.68 | 5.15 |
| chr2  | 233230363 | 233230739 | 377 * | 2.56 | 0.63 |
| chr3  | 136936337 | 136936938 | 602 * | 4.96 | 5.47 |
| chr6  | 64722170  | 64722672  | 503 * | 4.07 | 4.64 |
| chrX  | 63862408  | 63862940  | 533 * | 2.89 | 3.59 |
| chr7  | 123356985 | 123357278 | 294 * | 2.81 | 3.5  |
| chr2  | 161850991 | 161851249 | 259 * | 2.79 | 1.08 |
| chr4  | 170290885 | 170291390 | 506 * | 2.17 | 2.96 |
| chr22 | 26566860  | 26567210  | 351 * | 3.56 | 2.27 |
| chr20 | 33061171  | 33061606  | 436 * | 2.49 | 0.63 |
| chr7  | 116442770 | 116443217 | 448 * | 2.49 | 0.63 |
| chr8  | 11703112  | 11703377  | 266 * | 2.49 | 0.63 |
| chrX  | 104434891 | 104435406 | 516 * | 3.95 | 4.53 |
| chr12 | 15148823  | 15149169  | 347 * | 3.11 | 3.78 |
| chr7  | 9640652   | 9640942   | 291 * | 2.87 | 3.59 |
| chrX  | 129162120 | 129162763 | 644 * | 3.34 | 2.03 |
| chr16 | 10063461  | 10063709  | 249 * | 2.49 | 0.63 |
| chr7  | 79370843  | 79371336  | 494 * | 2.49 | 0.63 |
| chrX  | 31311469  | 31311836  | 368 * | 2.49 | 0.63 |
| chr11 | 24801311  | 24801712  | 402 * | 4.18 | 4.74 |
| chr10 | 76498625  | 76499076  | 452 * | 2.49 | 0.63 |
| chr11 | 75207363  | 75207675  | 313 * | 2.49 | 0.63 |

|       |           |           |       |      |      |
|-------|-----------|-----------|-------|------|------|
| chr8  | 107858121 | 107858576 | 456 * | 3.65 | 4.27 |
| chr7  | 48048905  | 48049170  | 266 * | 2.27 | 3.03 |
| chr14 | 29485367  | 29485823  | 457 * | 3.6  | 2.27 |
| chr19 | 57058849  | 57059266  | 418 * | 2.8  | 1.08 |
| chr17 | 15349394  | 15349754  | 361 * | 3.56 | 2.27 |
| chr21 | 19741306  | 19741717  | 412 * | 3.52 | 4.18 |
| chr7  | 135046472 | 135047011 | 540 * | 3.27 | 1.81 |
| chr17 | 69955332  | 69955640  | 309 * | 2.88 | 3.58 |
| chr15 | 75745227  | 75745528  | 302 * | 3.2  | 1.7  |
| chr10 | 25315444  | 25315739  | 296 * | 2.49 | 0.63 |
| chr2  | 236044676 | 236044933 | 258 * | 2.49 | 0.63 |
| chr5  | 126378331 | 126378599 | 269 * | 2.49 | 0.63 |
| chr7  | 44470986  | 44471247  | 262 * | 2.49 | 0.63 |
| chr12 | 81104052  | 81104723  | 672 * | 5.03 | 5.47 |
| chr1  | 19171494  | 19171760  | 267 * | 2.43 | 3.15 |
| chr2  | 73439627  | 73440000  | 374 * | 3.2  | 1.7  |
| chrX  | 53122339  | 53122583  | 245 * | 2.51 | 0.63 |
| chr1  | 176042726 | 176043038 | 313 * | 2.86 | 1.34 |
| chr11 | 133705082 | 133705439 | 358 * | 2.75 | 1.08 |
| chr1  | 53731737  | 53732028  | 292 * | 2.78 | 1.08 |
| chr6  | 39780965  | 39781270  | 306 * | 2.28 | 3.04 |
| chr16 | 17352756  | 17353008  | 253 * | 2.54 | 0.63 |
| chr21 | 34025668  | 34026087  | 420 * | 4.81 | 5.27 |
| chr1  | 64678132  | 64678598  | 467 * | 1.62 | 2.47 |
| chr1  | 116606726 | 116607151 | 426 * | 1.62 | 2.47 |
| chr11 | 107021278 | 107021517 | 240 * | 1.62 | 2.47 |
| chr12 | 98097753  | 98098149  | 397 * | 1.62 | 2.47 |
| chr2  | 187840057 | 187840430 | 374 * | 1.62 | 2.47 |
| chr3  | 35333287  | 35333646  | 360 * | 1.62 | 2.47 |
| chr3  | 62873888  | 62874131  | 244 * | 1.62 | 2.47 |
| chr4  | 60786149  | 60786386  | 238 * | 1.62 | 2.47 |
| chr4  | 73856565  | 73857040  | 476 * | 1.62 | 2.47 |
| chr4  | 86669707  | 86670284  | 578 * | 1.62 | 2.47 |
| chr5  | 106291941 | 106292177 | 237 * | 1.62 | 2.47 |
| chr8  | 125170930 | 125171287 | 358 * | 1.62 | 2.47 |
| chr4  | 24062600  | 24062815  | 216 * | 2.61 | 3.34 |
| chr15 | 64978299  | 64978737  | 439 * | 4.44 | 4.99 |
| chr2  | 124960770 | 124961129 | 360 * | 2.86 | 3.55 |
| chr10 | 105358535 | 105358892 | 358 * | 4.27 | 4.85 |
| chr4  | 148082039 | 148082416 | 378 * | 4.18 | 4.75 |
| chr19 | 17684818  | 17685229  | 412 * | 4.06 | 3.01 |
| chr4  | 114682926 | 114683233 | 308 * | 2.75 | 1.08 |
| chr20 | 38027400  | 38027667  | 268 * | 2.29 | 3.06 |

|      |           |           |       |      |      |
|------|-----------|-----------|-------|------|------|
| chr3 | 94267832  | 94268120  | 289 * | 2.29 | 3.06 |
| chr9 | 137341380 | 137341768 | 389 * | 4.5  | 3.7  |

| Conc_PWS | Fold change | p.value  | FDR     |
|----------|-------------|----------|---------|
| 3.39     | 2.67        | 7.25E-07 | 0.00963 |
| -0.67    | 5.88        | 8.09E-07 | 0.00963 |
| 1.84     | 3.55        | 1.11E-06 | 0.00963 |
| 0.92     | 4.21        | 3.42E-06 | 0.0223  |
| 0.92     | 4.1         | 5.55E-06 | 0.029   |
| -0.67    | 5.46        | 1.31E-05 | 0.057   |
| -0.67    | 5.39        | 2.23E-05 | 0.0754  |
| -0.67    | 5.37        | 2.56E-05 | 0.0754  |
| -0.67    | 5.34        | 2.60E-05 | 0.0754  |
| 0.92     | 3.91        | 3.53E-05 | 0.081   |
| -0.25    | 4.85        | 4.08E-05 | 0.081   |
| -0.67    | 5.26        | 4.15E-05 | 0.081   |
| -0.67    | 5.27        | 4.31E-05 | 0.081   |
| -0.67    | 5.32        | 4.43E-05 | 0.081   |
| 3.88     | 2.23        | 4.66E-05 | 0.081   |
| 1.65     | 3.47        | 5.06E-05 | 0.0825  |
| -0.67    | 5.17        | 6.76E-05 | 0.098   |
| -0.67    | 5.17        | 6.76E-05 | 0.098   |
| -0.67    | 5.09        | 9.10E-05 | 0.124   |
| -0.67    | 5.06        | 9.84E-05 | 0.124   |
| -0.25    | 4.68        | 1.00E-04 | 0.124   |
| -0.67    | 5.06        | 0.000106 | 0.125   |
| 0.07     | 4.4         | 0.000129 | 0.145   |
| -0.67    | 4.98        | 0.00014  | 0.145   |
| -0.67    | 4.98        | 0.00014  | 0.145   |
| -0.67    | 4.99        | 0.000145 | 0.145   |
| 5.05     | 1.85        | 0.000162 | 0.151   |
| -0.67    | 4.93        | 0.000166 | 0.151   |
| -0.67    | 5.01        | 0.000168 | 0.151   |
| 0.07     | 4.29        | 0.000187 | 0.159   |
| -0.67    | 5.11        | 0.000189 | 0.159   |
| 0.55     | 3.92        | 0.000196 | 0.16    |
| 0.56     | 3.92        | 0.000204 | 0.162   |
| 0.07     | 4.25        | 0.00022  | 0.163   |
| -0.67    | 4.89        | 0.000231 | 0.163   |
| 2.15     | 2.92        | 0.000236 | 0.163   |
| -0.25    | 4.46        | 0.000242 | 0.163   |
| -0.67    | 4.85        | 0.000242 | 0.163   |
| 1.46     | 3.43        | 0.000243 | 0.163   |
| -0.67    | 4.82        | 0.000259 | 0.169   |
| -0.67    | 4.82        | 0.000266 | 0.17    |

|       |       |          |       |
|-------|-------|----------|-------|
| -0.67 | 4.77  | 0.000312 | 0.194 |
| 4.44  | 1.87  | 0.000329 | 0.2   |
| 5.19  | -3.26 | 0.000344 | 0.2   |
| -0.67 | 4.72  | 0.000357 | 0.2   |
| -0.67 | 4.76  | 0.000359 | 0.2   |
| 0.07  | 4.13  | 0.000373 | 0.2   |
| -0.67 | 4.7   | 0.000373 | 0.2   |
| -0.67 | 4.73  | 0.000378 | 0.2   |
| 0.75  | 3.76  | 0.000383 | 0.2   |
| -0.67 | 4.92  | 0.000412 | 0.207 |
| 0.33  | 3.89  | 0.000413 | 0.207 |
| -0.67 | 4.69  | 0.000432 | 0.212 |
| -0.67 | 4.71  | 0.000443 | 0.214 |
| 0.92  | 3.61  | 0.000463 | 0.22  |
| 1.21  | 3.41  | 0.000532 | 0.248 |
| -0.67 | 4.66  | 0.000537 | 1     |
| -0.67 | 4.66  | 0.000537 | 1     |
| -0.67 | 4.6   | 0.000539 | 1     |
| -0.67 | 4.6   | 0.000539 | 1     |
| -0.67 | 4.66  | 0.000551 | 1     |
| -0.67 | 4.56  | 0.000603 | 1     |
| 0.56  | 3.75  | 0.000616 | 0.282 |
| -0.67 | 4.6   | 0.000622 | 1     |
| -0.67 | 4.53  | 0.000691 | 1     |
| -0.67 | 4.55  | 0.000724 | 1     |
| -0.67 | 4.5   | 0.000731 | 1     |
| 4.84  | -4.21 | 0.000784 | 0.353 |
| -0.67 | 4.49  | 0.000809 | 1     |
| -0.67 | 4.48  | 0.000822 | 1     |
| -0.67 | 4.48  | 0.000822 | 1     |
| -0.67 | 4.46  | 0.000837 | 1     |
| 0.07  | 3.95  | 0.000885 | 0.391 |
| -0.67 | 4.63  | 0.00092  | 1     |
| -0.25 | 4.12  | 0.000943 | 1     |
| 1.56  | 3.01  | 0.000964 | 0.419 |
| 6.38  | 1.59  | 0.00099  | 0.423 |
| -0.67 | 4.43  | 0.00101  | 1     |
| -0.67 | 4.43  | 0.00101  | 1     |
| 4.79  | -3.45 | 0.00104  | 0.426 |
| 1.66  | 3.02  | 0.00105  | 0.426 |
| 1.45  | 3.11  | 0.00105  | 0.426 |
| 5.33  | -2.4  | 0.00106  | 0.426 |
| -0.67 | 4.46  | 0.00116  | 1     |



|       |       |         |       |
|-------|-------|---------|-------|
| -0.67 | 4.37  | 0.00121 | 1     |
| 0.07  | 3.78  | 0.00122 | 1     |
| -0.67 | 4.34  | 0.00127 | 1     |
| -0.67 | 4.34  | 0.00127 | 1     |
| 6.02  | -1.77 | 0.00127 | 0.5   |
| 0.56  | 3.58  | 0.00128 | 0.5   |
| -0.67 | 4.39  | 0.00129 | 1     |
| 0.75  | 3.69  | 0.00131 | 0.502 |
| -0.67 | 4.62  | 0.00133 | 1     |
| 0.34  | 3.66  | 0.00138 | 0.523 |
| 0.56  | 3.61  | 0.00142 | 0.528 |
| -0.67 | 4.31  | 0.00147 | 1     |
| -0.67 | 4.31  | 0.00147 | 1     |
| -0.67 | 4.29  | 0.00148 | 1     |
| -0.67 | 4.4   | 0.00148 | 1     |
| 2.71  | 2.51  | 0.00148 | 0.546 |
| 0.07  | 3.73  | 0.00149 | 1     |
| -0.67 | 4.44  | 0.00151 | 1     |
| -0.67 | 4.39  | 0.00151 | 1     |
| 4.64  | -4.01 | 0.00153 | 0.554 |
| -0.67 | 4.35  | 0.00156 | 1     |
| -0.67 | 4.27  | 0.00159 | 1     |
| 0.34  | 3.62  | 0.00164 | 1     |
| 4.6   | -3.96 | 0.00164 | 0.58  |
| 4.6   | -3.96 | 0.00164 | 0.58  |
| -0.67 | 4.3   | 0.00165 | 1     |
| -0.67 | 4.3   | 0.00165 | 1     |
| 0.56  | 3.54  | 0.00178 | 0.602 |
| -0.67 | 4.25  | 0.0018  | 1     |
| -0.67 | 4.24  | 0.0018  | 1     |
| -0.67 | 4.24  | 0.0018  | 1     |
| 4.57  | -3.94 | 0.0018  | 0.602 |
| -0.25 | 3.92  | 0.00181 | 1     |
| 1.33  | 3.07  | 0.00181 | 0.602 |
| 0.56  | 3.4   | 0.00181 | 0.602 |
| 1.45  | 2.98  | 0.00182 | 0.602 |
| -0.67 | 4.22  | 0.00185 | 1     |
| -0.67 | 4.22  | 0.00185 | 1     |
| -0.67 | 4.22  | 0.00185 | 1     |
| -0.67 | 4.22  | 0.00185 | 1     |
| -0.67 | 4.22  | 0.00185 | 1     |
| -0.67 | 4.26  | 0.00186 | 1     |
| 4.65  | -4.02 | 0.0019  | 0.618 |

|       |       |         |       |
|-------|-------|---------|-------|
| -0.67 | 4.2   | 0.00202 | 1     |
| 4.86  | -3.15 | 0.00203 | 0.652 |
| 0.92  | 3.21  | 0.00205 | 0.652 |
| -0.67 | 4.28  | 0.00205 | 1     |
| -0.67 | 4.28  | 0.00208 | 1     |
| 0.07  | 3.77  | 0.00208 | 1     |
| -0.67 | 4.42  | 0.00214 | 1     |
| -0.67 | 4.36  | 0.00218 | 1     |
| 2.56  | 2.33  | 0.00223 | 0.701 |
| -0.67 | 4.17  | 0.00223 | 1     |
| -0.67 | 4.17  | 0.00223 | 1     |
| 0.92  | 3.29  | 0.00228 | 0.707 |
| -0.67 | 4.15  | 0.00234 | 1     |
| -0.25 | 4.06  | 0.0024  | 1     |
| 5.08  | -2.35 | 0.00242 | 0.743 |
| -0.67 | 4.21  | 0.00249 | 1     |
| 0.07  | 3.64  | 0.00251 | 1     |
| 0.92  | 3.26  | 0.00257 | 0.781 |
| -0.67 | 4.13  | 0.0026  | 1     |
| 1.66  | 2.97  | 0.00261 | 0.782 |
| -0.25 | 3.82  | 0.00263 | 1     |
| -0.25 | 3.83  | 0.00263 | 1     |
| 1.21  | 3.14  | 0.00267 | 0.782 |
| 0.75  | 3.32  | 0.00267 | 0.782 |
| 4.45  | -3.82 | 0.00272 | 0.782 |
| -0.67 | 4.27  | 0.00273 | 1     |
| 2.56  | 2.31  | 0.00275 | 0.782 |
| 0.92  | 3.34  | 0.00279 | 0.782 |
| 0.75  | 3.24  | 0.00279 | 0.782 |
| -0.67 | 4.09  | 0.00281 | 1     |
| 5.78  | -1.93 | 0.00285 | 0.792 |
| -0.67 | 4.16  | 0.00286 | 1     |
| -0.67 | 4.16  | 0.00286 | 1     |
| 1.07  | 3.01  | 0.00293 | 0.806 |
| 4.44  | -3.8  | 0.003   | 0.817 |
| -0.67 | 4.13  | 0.00303 | 1     |
| -0.67 | 4.13  | 0.00303 | 1     |
| 4.42  | -3.79 | 0.00309 | 0.83  |
| 0.56  | 3.34  | 0.00312 | 1     |
| 4.41  | -3.78 | 0.00317 | 0.845 |
| 0.56  | 3.34  | 0.00317 | 1     |
| 0.33  | 3.35  | 0.0032  | 1     |
| 1.66  | 2.84  | 0.00327 | 0.862 |

|       |       |         |       |
|-------|-------|---------|-------|
| 4.39  | -3.76 | 0.00332 | 0.866 |
| 0.34  | 3.5   | 0.00332 | 1     |
| 0.07  | 3.52  | 0.00333 | 1     |
| 0.07  | 3.55  | 0.0034  | 1     |
| -0.67 | 4.05  | 0.00341 | 1     |
| -0.25 | 3.73  | 0.00347 | 1     |
| 2.4   | 2.51  | 0.00352 | 0.909 |
| -0.67 | 4.04  | 0.00353 | 1     |
| -0.67 | 4.04  | 0.00353 | 1     |
| -0.67 | 4.04  | 0.00353 | 1     |
| 4.38  | -3.75 | 0.00355 | 0.909 |
| -0.67 | 4.41  | 0.00356 | 1     |
| -0.67 | 4.02  | 0.00359 | 1     |
| -0.67 | 4.02  | 0.00359 | 1     |
| 2.56  | 2.36  | 0.0036  | 0.913 |
| -0.67 | 4.06  | 0.00373 | 1     |
| 0.07  | 3.47  | 0.00376 | 1     |
| -0.25 | 3.71  | 0.00388 | 1     |
| -0.25 | 3.71  | 0.00388 | 1     |
| 0.55  | 3.2   | 0.00389 | 1     |
| 4.35  | -3.71 | 0.0039  | 0.98  |
| -0.67 | 3.99  | 0.00391 | 1     |
| -0.67 | 3.99  | 0.00391 | 1     |
| 4.34  | -3.7  | 0.00396 | 0.984 |
| 1.34  | 3     | 0.00401 | 0.985 |
| 5.11  | -2.19 | 0.00407 | 0.985 |
| 4.69  | -2.87 | 0.00408 | 0.985 |
| -0.67 | 4.03  | 0.00413 | 1     |
| -0.67 | 4.03  | 0.00413 | 1     |
| 0.07  | 3.5   | 0.00418 | 1     |
| -0.25 | 3.7   | 0.00422 | 1     |
| 4.49  | -3.15 | 0.00423 | 1     |
| 4.3   | -3.67 | 0.00437 | 1     |
| -0.67 | 4.08  | 0.00438 | 1     |
| -0.67 | 4.08  | 0.00438 | 1     |
| 0.07  | 3.41  | 0.0044  | 1     |
| 0.07  | 3.68  | 0.0044  | 1     |
| 4.83  | -2.66 | 0.00441 | 1     |
| -0.67 | 3.96  | 0.00449 | 1     |
| -0.67 | 3.96  | 0.00449 | 1     |
| -0.67 | 3.96  | 0.00449 | 1     |
| -0.25 | 3.66  | 0.00451 | 1     |
| -0.25 | 3.66  | 0.00451 | 1     |

|       |       |         |   |
|-------|-------|---------|---|
| 4.3   | -3.67 | 0.00454 | 1 |
| -0.67 | 3.97  | 0.00455 | 1 |
| 4.94  | -2.48 | 0.00458 | 1 |
| 0.56  | 3.23  | 0.00461 | 1 |
| 4.48  | -3.13 | 0.00463 | 1 |
| -0.67 | 3.98  | 0.00466 | 1 |
| -0.67 | 3.93  | 0.00467 | 1 |
| 4.87  | -2.37 | 0.00475 | 1 |
| 1.84  | 2.68  | 0.00479 | 1 |
| 0.75  | 3.17  | 0.00483 | 1 |
| 0.33  | 3.24  | 0.00493 | 1 |
| 1.33  | 2.76  | 0.00501 | 1 |
| -0.67 | 3.91  | 0.0052  | 1 |
| -0.67 | 3.91  | 0.0052  | 1 |
| -0.67 | 3.91  | 0.0052  | 1 |
| -0.67 | 4.07  | 0.00529 | 1 |
| 4.23  | -3.59 | 0.00532 | 1 |
| -0.67 | 4     | 0.00536 | 1 |
| -0.67 | 4     | 0.00536 | 1 |
| 0.07  | 3.38  | 0.00539 | 1 |
| 0.34  | 3.28  | 0.0054  | 1 |
| 1.07  | 2.96  | 0.00543 | 1 |
| 2.84  | 2.06  | 0.00545 | 1 |
| 2.21  | 2.35  | 0.00547 | 1 |
| 0.07  | 3.41  | 0.00553 | 1 |
| 0.34  | 3.39  | 0.00558 | 1 |
| 4.31  | -3.68 | 0.00558 | 1 |
| 4.39  | -3.05 | 0.00558 | 1 |
| 4.97  | -2.28 | 0.00559 | 1 |
| 4.21  | -3.58 | 0.0056  | 1 |
| 0.07  | 3.34  | 0.0057  | 1 |
| 0.07  | 3.34  | 0.0057  | 1 |
| 4.52  | -3.09 | 0.00571 | 1 |
| 4.22  | -3.59 | 0.00572 | 1 |
| -0.67 | 3.87  | 0.0058  | 1 |
| 4.38  | -3.04 | 0.00587 | 1 |
| 4.21  | -3.57 | 0.00588 | 1 |
| 1.07  | 2.9   | 0.00598 | 1 |
| 0.75  | 3.01  | 0.00602 | 1 |
| 0.34  | 3.3   | 0.00608 | 1 |
| 0.75  | 3.08  | 0.0061  | 1 |
| 4.69  | -2.52 | 0.00613 | 1 |
| 0.55  | 3.22  | 0.00613 | 1 |

|       |       |         |   |
|-------|-------|---------|---|
| -0.67 | 3.85  | 0.00617 | 1 |
| -0.67 | 3.89  | 0.00619 | 1 |
| -0.67 | 3.89  | 0.00619 | 1 |
| -0.67 | 3.89  | 0.00619 | 1 |
| -0.67 | 3.89  | 0.00619 | 1 |
| 4.19  | -3.56 | 0.00619 | 1 |
| 1.07  | 2.82  | 0.0062  | 1 |
| 0.07  | 3.39  | 0.0062  | 1 |
| 0.07  | 3.39  | 0.0062  | 1 |
| 4.16  | -3.53 | 0.00635 | 1 |
| 3.4   | 1.91  | 0.00647 | 1 |
| -0.67 | 3.92  | 0.00666 | 1 |
| -0.67 | 3.92  | 0.00666 | 1 |
| -0.67 | 3.92  | 0.00666 | 1 |
| 0.07  | 3.37  | 0.00669 | 1 |
| 0.56  | 3.12  | 0.00671 | 1 |
| 1.07  | 2.81  | 0.00676 | 1 |
| 2.61  | 2.17  | 0.00681 | 1 |
| 4.33  | -2.99 | 0.00686 | 1 |
| 4.17  | -3.54 | 0.00691 | 1 |
| 4.33  | -2.99 | 0.00694 | 1 |
| -0.67 | 3.82  | 0.00703 | 1 |
| -0.67 | 3.82  | 0.00703 | 1 |
| -0.67 | 3.82  | 0.00703 | 1 |
| 0.56  | 3.11  | 0.00708 | 1 |
| -0.25 | 3.52  | 0.00714 | 1 |
| 0.07  | 3.48  | 0.00721 | 1 |
| 4.14  | -3.51 | 0.00723 | 1 |
| 0.07  | 3.32  | 0.00727 | 1 |
| 5.5   | -1.7  | 0.00728 | 1 |
| 2.56  | 2.2   | 0.00729 | 1 |
| 2.92  | 1.98  | 0.0073  | 1 |
| 4.42  | -2.99 | 0.00732 | 1 |
| 0.55  | 3     | 0.00734 | 1 |
| 0.07  | 3.37  | 0.0074  | 1 |
| 0.07  | 3.37  | 0.0074  | 1 |
| 4.38  | -3.29 | 0.00742 | 1 |
| 4.14  | -3.51 | 0.00746 | 1 |
| 0.34  | 3.2   | 0.00747 | 1 |
| 4.52  | -2.7  | 0.00747 | 1 |
| 1.46  | 2.9   | 0.00755 | 1 |
| -0.67 | 3.8   | 0.00761 | 1 |
| -0.67 | 3.8   | 0.00761 | 1 |

|       |       |         |   |
|-------|-------|---------|---|
| -0.67 | 3.8   | 0.00761 | 1 |
| -0.67 | 3.8   | 0.00761 | 1 |
| 4.12  | -3.49 | 0.00763 | 1 |
| -0.67 | 3.78  | 0.00764 | 1 |
| -0.67 | 3.78  | 0.00764 | 1 |
| 2.88  | 2.01  | 0.00779 | 1 |
| 1.21  | 2.7   | 0.00795 | 1 |
| 4.27  | -3.63 | 0.00806 | 1 |
| 4.33  | -2.99 | 0.00821 | 1 |
| -0.25 | 3.65  | 0.00821 | 1 |
| -0.25 | 3.65  | 0.00821 | 1 |
| 0.07  | 3.31  | 0.00822 | 1 |
| 4.09  | -3.45 | 0.00825 | 1 |
| 4.09  | -3.45 | 0.00825 | 1 |
| 0.56  | 3.06  | 0.0083  | 1 |
| -0.67 | 3.75  | 0.00831 | 1 |
| -0.67 | 3.75  | 0.00831 | 1 |
| -0.67 | 3.75  | 0.00831 | 1 |
| -0.67 | 3.75  | 0.00831 | 1 |
| 4.29  | -2.95 | 0.00832 | 1 |
| 0.75  | 3.01  | 0.00837 | 1 |
| -0.67 | 3.83  | 0.00839 | 1 |
| -0.67 | 3.83  | 0.00839 | 1 |
| 0.34  | 3.18  | 0.00839 | 1 |
| 0.07  | 3.3   | 0.00845 | 1 |
| -0.67 | 3.8   | 0.00859 | 1 |
| -0.67 | 3.8   | 0.00859 | 1 |
| -0.67 | 3.8   | 0.00859 | 1 |
| 4.27  | -2.93 | 0.00861 | 1 |
| 4.21  | -3.13 | 0.00862 | 1 |
| 0.07  | 3.27  | 0.00863 | 1 |
| 0.07  | 3.27  | 0.00863 | 1 |
| 2     | 2.49  | 0.00873 | 1 |
| 0.92  | 2.77  | 0.00878 | 1 |
| 4.28  | 1.44  | 0.00895 | 1 |
| 2.66  | 2.06  | 0.00909 | 1 |
| 4.02  | -3.38 | 0.00911 | 1 |
| 4.04  | -3.4  | 0.00911 | 1 |
| 4.24  | -2.9  | 0.00913 | 1 |
| 4.09  | -3.45 | 0.00915 | 1 |
| 4.03  | -3.4  | 0.00918 | 1 |
| 5.02  | -2.01 | 0.00919 | 1 |
| 1.45  | 2.8   | 0.00924 | 1 |

|       |       |         |   |
|-------|-------|---------|---|
| 3.11  | 1.86  | 0.00933 | 1 |
| 4.03  | -3.4  | 0.00942 | 1 |
| 1.45  | 2.58  | 0.00945 | 1 |
| 4.19  | -3.11 | 0.00946 | 1 |
| 0.07  | 3.25  | 0.00946 | 1 |
| 3.18  | 1.81  | 0.00946 | 1 |
| 4.05  | -3.42 | 0.00949 | 1 |
| -0.25 | 3.43  | 0.00953 | 1 |
| 1.55  | 2.52  | 0.00957 | 1 |
| 2.7   | 2.02  | 0.00968 | 1 |
| -0.67 | 3.73  | 0.00971 | 1 |
| -0.67 | 3.73  | 0.00971 | 1 |
| -0.67 | 3.73  | 0.00971 | 1 |
| -0.67 | 3.73  | 0.00971 | 1 |
| 4.67  | -2.53 | 0.00972 | 1 |
| 3.36  | 1.71  | 0.00979 | 1 |
| -0.67 | 3.71  | 0.00999 | 1 |
| -0.67 | 3.71  | 0.00999 | 1 |
| 3.53  | 1.67  | 0.00999 | 1 |
| 4.23  | -2.89 | 0.01    | 1 |
| 0.75  | 2.95  | 0.01    | 1 |
| 1.07  | 2.73  | 0.01    | 1 |
| 3.45  | 1.66  | 0.0101  | 1 |
| 1.33  | 2.73  | 0.0101  | 1 |
| 1.46  | 2.75  | 0.0102  | 1 |
| 2.75  | 2.12  | 0.0102  | 1 |
| -0.67 | 3.68  | 0.0103  | 1 |
| -0.67 | 3.68  | 0.0103  | 1 |
| -0.67 | 3.68  | 0.0103  | 1 |
| -0.67 | 3.68  | 0.0103  | 1 |
| -0.67 | 3.68  | 0.0103  | 1 |
| -0.67 | 3.68  | 0.0103  | 1 |
| -0.67 | 3.68  | 0.0103  | 1 |
| 0.56  | 2.99  | 0.0104  | 1 |
| 2.84  | 2.08  | 0.0104  | 1 |
| 4.56  | -2.47 | 0.0104  | 1 |
| 0.34  | 3.09  | 0.0104  | 1 |
| 4.14  | -3.06 | 0.0104  | 1 |
| 4.72  | -2.26 | 0.0105  | 1 |
| -0.67 | 3.73  | 0.0107  | 1 |
| -0.67 | 3.73  | 0.0107  | 1 |
| 0.75  | 2.82  | 0.0107  | 1 |
| 3.96  | -3.32 | 0.0108  | 1 |

|       |       |        |   |
|-------|-------|--------|---|
| -0.25 | 3.4   | 0.0109 | 1 |
| 0.33  | 2.99  | 0.011  | 1 |
| 0.75  | 2.84  | 0.0111 | 1 |
| 4.98  | -1.97 | 0.0111 | 1 |
| 4.54  | -2.46 | 0.0112 | 1 |
| 0.34  | 3.07  | 0.0112 | 1 |
| 1.66  | 2.47  | 0.0112 | 1 |
| 1.33  | 2.54  | 0.0113 | 1 |
| 0.07  | 3.19  | 0.0113 | 1 |
| 0.07  | 3.19  | 0.0113 | 1 |
| 2.28  | 2.32  | 0.0113 | 1 |
| -0.67 | 3.77  | 0.0114 | 1 |
| 4.18  | -2.83 | 0.0114 | 1 |
| -0.67 | 3.65  | 0.0114 | 1 |
| -0.67 | 3.65  | 0.0114 | 1 |
| -0.67 | 3.65  | 0.0114 | 1 |
| -0.67 | 3.65  | 0.0114 | 1 |
| -0.67 | 3.65  | 0.0114 | 1 |
| -0.67 | 3.65  | 0.0114 | 1 |
| -0.67 | 3.65  | 0.0114 | 1 |
| 4.38  | -2.57 | 0.0115 | 1 |
| 4.48  | -2.45 | 0.0115 | 1 |
| 1.84  | 2.58  | 0.0116 | 1 |
| 3.92  | -3.29 | 0.0116 | 1 |
| 2.28  | 2.41  | 0.0116 | 1 |
| 3.92  | -3.29 | 0.0117 | 1 |
| 4.16  | -2.82 | 0.0117 | 1 |
| 4.69  | -2.24 | 0.0117 | 1 |
| 3.96  | -3.32 | 0.0118 | 1 |
| -0.25 | 3.36  | 0.0118 | 1 |
| -0.25 | 3.57  | 0.012  | 1 |
| 3.92  | -3.28 | 0.0121 | 1 |
| 0.92  | 2.84  | 0.0121 | 1 |
| 4.37  | -2.55 | 0.0121 | 1 |
| 4.03  | -3.4  | 0.0121 | 1 |
| 4.26  | -2.83 | 0.0122 | 1 |
| 0.56  | 3     | 0.0122 | 1 |
| -0.67 | 3.7   | 0.0122 | 1 |
| 4.15  | 1.47  | 0.0122 | 1 |
| 3.9   | -3.27 | 0.0123 | 1 |
| -0.25 | 3.44  | 0.0124 | 1 |
| 5.72  | -1.39 | 0.0124 | 1 |
| 1.21  | 2.57  | 0.0124 | 1 |



|       |       |        |   |
|-------|-------|--------|---|
| 3.9   | -3.27 | 0.0125 | 1 |
| 1.07  | 2.66  | 0.0125 | 1 |
| 4.19  | -2.85 | 0.0125 | 1 |
| 4.33  | -2.7  | 0.0126 | 1 |
| 4.07  | -2.99 | 0.0127 | 1 |
| 3.88  | -3.25 | 0.0127 | 1 |
| 3.88  | -3.25 | 0.0127 | 1 |
| 3.88  | -3.25 | 0.0128 | 1 |
| 3.88  | -3.25 | 0.0128 | 1 |
| 0.56  | 2.88  | 0.0129 | 1 |
| 4.49  | 1.33  | 0.0129 | 1 |
| 1.83  | 2.33  | 0.0129 | 1 |
| -0.25 | 3.33  | 0.0129 | 1 |
| -0.25 | 3.41  | 0.013  | 1 |
| 5.35  | -1.55 | 0.013  | 1 |
| 3.9   | -3.26 | 0.0131 | 1 |
| 0.56  | 2.92  | 0.0131 | 1 |
| 0.56  | 2.95  | 0.0132 | 1 |
| 3.51  | 1.62  | 0.0132 | 1 |
| -0.67 | 3.6   | 0.0134 | 1 |
| -0.67 | 3.6   | 0.0134 | 1 |
| -0.67 | 3.6   | 0.0134 | 1 |
| 4.33  | -2.52 | 0.0134 | 1 |
| 1.08  | 2.82  | 0.0134 | 1 |
| 1.56  | 2.64  | 0.0134 | 1 |
| 0.55  | 2.83  | 0.0135 | 1 |
| 4.19  | -2.85 | 0.0137 | 1 |
| 4.26  | 1.45  | 0.0137 | 1 |
| 0.56  | 2.98  | 0.0137 | 1 |
| -0.67 | 3.62  | 0.0137 | 1 |
| 2     | 2.33  | 0.0138 | 1 |
| 3.88  | -3.24 | 0.0138 | 1 |
| 4.17  | -3.54 | 0.0139 | 1 |
| 0.75  | 2.92  | 0.014  | 1 |
| -0.67 | 3.63  | 0.014  | 1 |
| -0.67 | 3.57  | 0.0141 | 1 |
| -0.67 | 3.57  | 0.0141 | 1 |
| -0.67 | 3.57  | 0.0141 | 1 |
| -0.67 | 3.57  | 0.0141 | 1 |
| -0.67 | 3.57  | 0.0141 | 1 |
| 4.11  | -2.77 | 0.0141 | 1 |
| 3.84  | -3.2  | 0.0142 | 1 |
| 4.24  | -2.61 | 0.0142 | 1 |

|      |       |        |   |
|------|-------|--------|---|
| 4.71 | -2.26 | 0.0142 | 1 |
| 3.15 | 1.96  | 0.0142 | 1 |
| 1.66 | 2.43  | 0.0143 | 1 |
| 4.69 | -2.38 | 0.0143 | 1 |
| 3.92 | 1.51  | 0.0144 | 1 |
| 3.84 | -3.2  | 0.0144 | 1 |
| 5.9  | -1.39 | 0.0144 | 1 |
| 4.32 | -2.51 | 0.0145 | 1 |
| 5.04 | 1.14  | 0.0145 | 1 |
| 4.11 | 1.39  | 0.0146 | 1 |
| 2.92 | 1.85  | 0.0147 | 1 |
| 3.82 | -3.18 | 0.0147 | 1 |
| 3.82 | -3.18 | 0.0147 | 1 |
| 4.09 | -3    | 0.0147 | 1 |
| 3.82 | -3.18 | 0.0148 | 1 |
| 0.07 | 3.04  | 0.0148 | 1 |
| 0.55 | 2.94  | 0.0148 | 1 |
| 1.56 | 2.53  | 0.0148 | 1 |
| 3.82 | -3.18 | 0.0149 | 1 |
| 0.75 | 2.88  | 0.015  | 1 |
| 0.07 | 3.1   | 0.015  | 1 |
| 2.71 | 2.04  | 0.0151 | 1 |
| 3.92 | -3.28 | 0.0151 | 1 |
| 0.07 | 3.14  | 0.0152 | 1 |
| 0.07 | 3.14  | 0.0152 | 1 |
| 3.66 | 1.59  | 0.0152 | 1 |
| 4.87 | -1.91 | 0.0152 | 1 |
| 3.86 | -3.22 | 0.0152 | 1 |
| 1.45 | 2.4   | 0.0153 | 1 |
| 1.21 | 2.51  | 0.0154 | 1 |
| 4.59 | -2.45 | 0.0155 | 1 |
| 3.33 | 1.63  | 0.0155 | 1 |
| 2.46 | 2.29  | 0.0155 | 1 |
| 3.79 | -3.16 | 0.0156 | 1 |
| 2.51 | 2.06  | 0.0156 | 1 |
| 4.29 | -2.47 | 0.0157 | 1 |
| 2.61 | 2.02  | 0.0157 | 1 |
| 0.75 | 2.71  | 0.0157 | 1 |
| 2.07 | 2.22  | 0.0157 | 1 |
| 0.34 | 3.07  | 0.0159 | 1 |
| 3.82 | -3.19 | 0.016  | 1 |
| 3.58 | 1.58  | 0.0161 | 1 |
| 3.79 | -3.16 | 0.0161 | 1 |

|       |       |        |   |
|-------|-------|--------|---|
| 0.07  | 3.02  | 0.0161 | 1 |
| -0.67 | 3.54  | 0.0161 | 1 |
| -0.67 | 3.54  | 0.0161 | 1 |
| -0.67 | 3.54  | 0.0161 | 1 |
| -0.67 | 3.54  | 0.0161 | 1 |
| -0.67 | 3.54  | 0.0161 | 1 |
| -0.67 | 3.54  | 0.0161 | 1 |
| -0.67 | 3.54  | 0.0161 | 1 |
| -0.67 | 3.54  | 0.0161 | 1 |
| -0.67 | 3.54  | 0.0161 | 1 |
| 0.75  | 2.72  | 0.0161 | 1 |
| 4.05  | -2.71 | 0.0163 | 1 |
| 0.33  | 2.87  | 0.0164 | 1 |
| 3.79  | -3.16 | 0.0165 | 1 |
| 2.71  | 2.2   | 0.0165 | 1 |
| 0.07  | 3.09  | 0.0165 | 1 |
| 0.34  | 2.95  | 0.0166 | 1 |
| 0.34  | 2.95  | 0.0166 | 1 |
| 3.82  | -3.19 | 0.0166 | 1 |
| -0.25 | 3.32  | 0.0166 | 1 |
| 1.2   | 2.53  | 0.0167 | 1 |
| 1.08  | 2.67  | 0.0167 | 1 |
| 1.21  | 2.55  | 0.0167 | 1 |
| 4.3   | -2.6  | 0.0168 | 1 |
| 1.08  | 2.69  | 0.0168 | 1 |
| 0.34  | 3.29  | 0.0169 | 1 |
| 0.92  | 2.81  | 0.0169 | 1 |
| 3.77  | -3.14 | 0.017  | 1 |
| 0.34  | 2.97  | 0.017  | 1 |
| 3.75  | -3.12 | 0.0171 | 1 |
| 4.02  | -2.68 | 0.0171 | 1 |
| 0.07  | 3.08  | 0.0172 | 1 |
| 3.75  | -3.12 | 0.0172 | 1 |
| 4.42  | -2.49 | 0.0173 | 1 |
| 4.81  | -1.88 | 0.0175 | 1 |
| 3.79  | -3.16 | 0.0176 | 1 |
| 4.07  | -2.73 | 0.0176 | 1 |
| 2.96  | 1.78  | 0.0176 | 1 |
| 1.34  | 2.59  | 0.0177 | 1 |
| 0.55  | 2.74  | 0.0177 | 1 |
| 5.32  | 1.31  | 0.0177 | 1 |
| -0.67 | 3.59  | 0.0178 | 1 |

|       |       |        |   |
|-------|-------|--------|---|
| -0.67 | 3.59  | 0.0178 | 1 |
| 5.3   | -1.65 | 0.0179 | 1 |
| -0.25 | 3.23  | 0.0179 | 1 |
| 4.29  | -2.47 | 0.0179 | 1 |
| 4.45  | -2.28 | 0.0179 | 1 |
| 3.77  | -3.14 | 0.018  | 1 |
| 3.75  | -3.11 | 0.018  | 1 |
| 3.88  | 1.48  | 0.0181 | 1 |
| 3.73  | 1.58  | 0.0181 | 1 |
| 3.73  | -3.09 | 0.0181 | 1 |
| 1.21  | 2.68  | 0.0181 | 1 |
| 4.6   | -2.34 | 0.0182 | 1 |
| 3.61  | 1.5   | 0.0182 | 1 |
| 1.92  | 2.34  | 0.0183 | 1 |
| -0.67 | 3.49  | 0.0183 | 1 |
| -0.67 | 3.49  | 0.0183 | 1 |
| -0.67 | 3.49  | 0.0183 | 1 |
| -0.67 | 3.49  | 0.0183 | 1 |
| -0.67 | 3.49  | 0.0183 | 1 |
| 0.75  | 2.77  | 0.0183 | 1 |
| 2.07  | 2.18  | 0.0184 | 1 |
| 1.07  | 2.74  | 0.0184 | 1 |
| 4     | -2.66 | 0.0184 | 1 |
| 0.07  | 3.04  | 0.0185 | 1 |
| 0.55  | 2.76  | 0.0185 | 1 |
| 3.84  | 1.51  | 0.0185 | 1 |
| 3.75  | -3.11 | 0.0185 | 1 |
| 4.29  | -2.58 | 0.0186 | 1 |
| 4.45  | -2.23 | 0.0187 | 1 |
| 0.07  | 3.19  | 0.0187 | 1 |
| -0.67 | 3.52  | 0.0187 | 1 |
| 3.92  | -2.84 | 0.0187 | 1 |
| 1.08  | 2.64  | 0.0188 | 1 |
| 0.07  | 2.99  | 0.0188 | 1 |
| 0.07  | 2.99  | 0.0188 | 1 |
| 4.24  | -2.43 | 0.0189 | 1 |
| 3.75  | -3.11 | 0.0192 | 1 |
| 3.79  | -3.16 | 0.0192 | 1 |
| 0.34  | 2.9   | 0.0194 | 1 |
| 0.07  | 2.97  | 0.0194 | 1 |
| 0.07  | 2.97  | 0.0194 | 1 |
| 3.7   | -3.07 | 0.0194 | 1 |
| 3.7   | -3.07 | 0.0194 | 1 |

|       |       |        |   |
|-------|-------|--------|---|
| 4.58  | -2.19 | 0.0195 | 1 |
| 3.98  | -2.64 | 0.0195 | 1 |
| 4.63  | -2    | 0.0195 | 1 |
| 1.76  | 2.47  | 0.0195 | 1 |
| 4.26  | -2.56 | 0.0195 | 1 |
| 4.75  | -2.05 | 0.0196 | 1 |
| 1.21  | 2.58  | 0.0197 | 1 |
| 1.45  | 2.33  | 0.0197 | 1 |
| -0.67 | 3.46  | 0.0197 | 1 |
| -0.67 | 3.46  | 0.0197 | 1 |
| -0.67 | 3.46  | 0.0197 | 1 |
| -0.67 | 3.46  | 0.0197 | 1 |
| -0.67 | 3.46  | 0.0197 | 1 |
| -0.67 | 3.46  | 0.0197 | 1 |
| -0.67 | 3.46  | 0.0197 | 1 |
| -0.67 | 3.46  | 0.0197 | 1 |
| -0.67 | 3.46  | 0.0197 | 1 |
| -0.67 | 3.46  | 0.0197 | 1 |
| 2     | 2.19  | 0.0198 | 1 |
| 4.62  | -2.16 | 0.0198 | 1 |
| 2.56  | 2.13  | 0.0198 | 1 |
| 2.56  | 1.96  | 0.0198 | 1 |
| -0.67 | 3.51  | 0.0199 | 1 |
| -0.67 | 3.51  | 0.0199 | 1 |
| -0.67 | 3.51  | 0.0199 | 1 |
| 2.39  | 2.02  | 0.0199 | 1 |
| 2.71  | 1.9   | 0.0199 | 1 |
| 4.58  | -2.16 | 0.0199 | 1 |
| 0.07  | 3.09  | 0.02   | 1 |
| 0.07  | 3.09  | 0.02   | 1 |
| 0.07  | 3.09  | 0.02   | 1 |
| 2.56  | 2.12  | 0.02   | 1 |
| 4.39  | -2.46 | 0.0202 | 1 |
| 4.41  | -2.24 | 0.0202 | 1 |
| 4.09  | -2.74 | 0.0202 | 1 |
| 0.55  | 2.69  | 0.0203 | 1 |
| 3.68  | -3.05 | 0.0203 | 1 |
| 3.72  | -3.09 | 0.0204 | 1 |
| 3.25  | 1.91  | 0.0204 | 1 |
| 3.68  | -3.05 | 0.0206 | 1 |
| 3.68  | -3.05 | 0.0206 | 1 |
| 1.92  | 2.2   | 0.0206 | 1 |
| 0.75  | 2.58  | 0.0206 | 1 |

|       |       |        |   |
|-------|-------|--------|---|
| 3.88  | -2.8  | 0.0207 | 1 |
| 4.58  | -2.27 | 0.0207 | 1 |
| 1.21  | 2.56  | 0.021  | 1 |
| 1.21  | 2.56  | 0.021  | 1 |
| 4.48  | -2.21 | 0.021  | 1 |
| 3.68  | -3.05 | 0.021  | 1 |
| 0.07  | 3.05  | 0.021  | 1 |
| 4.11  | -2.68 | 0.0211 | 1 |
| 3.88  | -2.79 | 0.0211 | 1 |
| 3.66  | -3.02 | 0.0211 | 1 |
| 3.66  | -3.02 | 0.0211 | 1 |
| 3.66  | -3.02 | 0.0211 | 1 |
| 3.66  | -3.02 | 0.0211 | 1 |
| 4.21  | -2.39 | 0.0212 | 1 |
| 0.75  | 2.71  | 0.0212 | 1 |
| 1.45  | 2.36  | 0.0212 | 1 |
| 4.24  | -2.89 | 0.0212 | 1 |
| 3.72  | -3.09 | 0.0213 | 1 |
| 1.92  | 2.22  | 0.0213 | 1 |
| 4.32  | 1.26  | 0.0213 | 1 |
| 0.33  | 2.8   | 0.0213 | 1 |
| 4.43  | -2.26 | 0.0214 | 1 |
| 0.33  | 2.78  | 0.0214 | 1 |
| 1.21  | 2.49  | 0.0215 | 1 |
| 4.59  | -2.14 | 0.0215 | 1 |
| -0.25 | 3.21  | 0.0216 | 1 |
| 3.96  | -2.62 | 0.0216 | 1 |
| 0.56  | 2.77  | 0.0217 | 1 |
| 0.56  | 2.77  | 0.0217 | 1 |
| 0.91  | 2.63  | 0.0217 | 1 |
| -0.25 | 3.21  | 0.0217 | 1 |
| -0.25 | 3.21  | 0.0217 | 1 |
| 3.94  | -2.6  | 0.0218 | 1 |
| 1.84  | 2.2   | 0.0218 | 1 |
| 3.66  | -3.02 | 0.0219 | 1 |
| 3.66  | -3.02 | 0.0219 | 1 |
| 3.66  | -3.02 | 0.0219 | 1 |
| 1.2   | 2.45  | 0.0219 | 1 |
| 4.05  | -2.63 | 0.022  | 1 |
| 3.75  | -3.11 | 0.022  | 1 |
| 1.56  | 2.31  | 0.022  | 1 |
| 0.91  | 2.51  | 0.0221 | 1 |
| 5.41  | -1.4  | 0.0221 | 1 |

|       |       |        |   |
|-------|-------|--------|---|
| 1.34  | 2.51  | 0.0221 | 1 |
| 0.07  | 2.92  | 0.0221 | 1 |
| 0.07  | 2.92  | 0.0221 | 1 |
| 0.55  | 2.73  | 0.0221 | 1 |
| 3.92  | -2.58 | 0.0221 | 1 |
| 3.92  | -2.58 | 0.0221 | 1 |
| 2.08  | 2.33  | 0.0223 | 1 |
| 3.68  | -3.05 | 0.0224 | 1 |
| 4.87  | -1.72 | 0.0225 | 1 |
| 2.76  | 2.07  | 0.0226 | 1 |
| 3.66  | -3.03 | 0.0226 | 1 |
| 3.88  | -2.79 | 0.0227 | 1 |
| 3.88  | -2.79 | 0.0227 | 1 |
| 0.34  | 2.84  | 0.0227 | 1 |
| 2.84  | 1.78  | 0.0227 | 1 |
| 1.2   | 2.44  | 0.0229 | 1 |
| 3.94  | -2.6  | 0.0229 | 1 |
| 4.56  | -2.02 | 0.023  | 1 |
| 3.9   | -2.56 | 0.0231 | 1 |
| 3.9   | -2.56 | 0.0231 | 1 |
| 3.64  | -3    | 0.0231 | 1 |
| -0.67 | 3.43  | 0.0232 | 1 |
| -0.67 | 3.43  | 0.0232 | 1 |
| -0.67 | 3.43  | 0.0232 | 1 |
| -0.67 | 3.43  | 0.0232 | 1 |
| -0.67 | 3.43  | 0.0232 | 1 |
| -0.67 | 3.43  | 0.0232 | 1 |
| -0.67 | 3.43  | 0.0232 | 1 |
| -0.67 | 3.43  | 0.0232 | 1 |
| -0.67 | 3.43  | 0.0232 | 1 |
| -0.67 | 3.43  | 0.0232 | 1 |
| -0.67 | 3.43  | 0.0232 | 1 |
| -0.67 | 3.43  | 0.0232 | 1 |
| -0.67 | 3.43  | 0.0232 | 1 |
| -0.67 | 3.43  | 0.0232 | 1 |
| -0.67 | 3.43  | 0.0232 | 1 |
| -0.67 | 3.43  | 0.0232 | 1 |
| -0.67 | 3.43  | 0.0232 | 1 |
| 3.63  | -3    | 0.0232 | 1 |
| 1.34  | 2.49  | 0.0233 | 1 |
| 4.5   | -2.12 | 0.0233 | 1 |
| 4.92  | -1.68 | 0.0234 | 1 |
| 3.72  | -3.09 | 0.0236 | 1 |
| 3.53  | 1.59  | 0.0236 | 1 |

|      |       |        |   |
|------|-------|--------|---|
| 4.97 | -1.61 | 0.0236 | 1 |
| 3.61 | -2.97 | 0.0236 | 1 |
| 3.61 | -2.97 | 0.0236 | 1 |
| 3.61 | -2.97 | 0.0236 | 1 |
| 4.67 | -1.97 | 0.0237 | 1 |
| 0.34 | 2.91  | 0.0238 | 1 |
| 2.51 | 2.03  | 0.0238 | 1 |
| 4.34 | 1.32  | 0.0238 | 1 |
| 3.11 | 1.69  | 0.0238 | 1 |
| 3.61 | -2.97 | 0.0238 | 1 |
| 5.42 | -1.33 | 0.0238 | 1 |
| 3.9  | -2.56 | 0.0239 | 1 |
| 3.65 | -3.02 | 0.0239 | 1 |
| 4.39 | -2.22 | 0.0239 | 1 |
| 2.33 | 1.97  | 0.024  | 1 |
| 2.96 | 1.75  | 0.024  | 1 |
| 4.53 | -2.07 | 0.024  | 1 |
| 4.29 | 1.27  | 0.024  | 1 |
| 2.66 | 1.85  | 0.0241 | 1 |
| 3.82 | -2.73 | 0.0241 | 1 |
| 3.61 | -2.97 | 0.0242 | 1 |
| 3.4  | 1.58  | 0.0242 | 1 |
| 3.82 | -2.73 | 0.0242 | 1 |
| 4.05 | -2.42 | 0.0243 | 1 |
| 2.45 | 2.01  | 0.0243 | 1 |
| 5.36 | -1.36 | 0.0245 | 1 |
| 2.34 | 2.09  | 0.0245 | 1 |
| 3.63 | -3    | 0.0246 | 1 |
| 1.45 | 2.35  | 0.0246 | 1 |
| 0.07 | 2.94  | 0.0247 | 1 |
| 0.07 | 2.94  | 0.0247 | 1 |
| 4.71 | -2.02 | 0.0247 | 1 |
| 3.77 | -3.13 | 0.0248 | 1 |
| 3.77 | -3.13 | 0.0248 | 1 |
| 1.83 | 2.17  | 0.0248 | 1 |
| 0.75 | 2.69  | 0.0248 | 1 |
| 0.75 | 2.69  | 0.0248 | 1 |
| 4.8  | -1.75 | 0.0248 | 1 |
| 2.66 | 1.89  | 0.0249 | 1 |
| 0.56 | 2.75  | 0.0249 | 1 |
| 2.84 | 1.82  | 0.0249 | 1 |
| 3.58 | -2.95 | 0.0249 | 1 |
| 3.58 | -2.95 | 0.0249 | 1 |



|       |       |        |   |
|-------|-------|--------|---|
| 3.88  | -2.54 | 0.0249 | 1 |
| 3.81  | -2.73 | 0.025  | 1 |
| 3.58  | -2.95 | 0.025  | 1 |
| 3.58  | -2.95 | 0.025  | 1 |
| 3.58  | -2.95 | 0.025  | 1 |
| 3.58  | -2.95 | 0.025  | 1 |
| 4.18  | -2.47 | 0.0251 | 1 |
| 0.56  | 2.74  | 0.0251 | 1 |
| 3.99  | -2.65 | 0.0251 | 1 |
| 5.19  | -1.47 | 0.0251 | 1 |
| 4.14  | -2.33 | 0.0252 | 1 |
| -0.25 | 3.13  | 0.0252 | 1 |
| -0.25 | 3.13  | 0.0252 | 1 |
| -0.25 | 3.13  | 0.0252 | 1 |
| -0.25 | 3.13  | 0.0252 | 1 |
| 3.88  | 1.56  | 0.0252 | 1 |
| 2.15  | 2.19  | 0.0252 | 1 |
| 0.92  | 2.57  | 0.0252 | 1 |
| 0.92  | 2.48  | 0.0253 | 1 |
| 4.21  | -2.39 | 0.0253 | 1 |
| 3.58  | -2.95 | 0.0253 | 1 |
| 2     | 2.12  | 0.0253 | 1 |
| -0.67 | 3.4   | 0.0254 | 1 |
| -0.67 | 3.4   | 0.0254 | 1 |
| -0.67 | 3.4   | 0.0254 | 1 |
| -0.67 | 3.4   | 0.0254 | 1 |
| -0.67 | 3.4   | 0.0254 | 1 |
| -0.67 | 3.4   | 0.0254 | 1 |
| -0.67 | 3.4   | 0.0254 | 1 |
| -0.67 | 3.4   | 0.0254 | 1 |
| -0.67 | 3.4   | 0.0254 | 1 |
| 3.61  | -2.97 | 0.0254 | 1 |
| 2.71  | 1.91  | 0.0254 | 1 |
| -0.67 | 3.37  | 0.0255 | 1 |
| -0.67 | 3.37  | 0.0255 | 1 |
| -0.67 | 3.37  | 0.0255 | 1 |
| 3.82  | -2.74 | 0.0255 | 1 |
| 4.37  | 1.28  | 0.0256 | 1 |
| 3.64  | -3    | 0.0256 | 1 |
| 3.81  | -2.73 | 0.0256 | 1 |
| 3.58  | -2.95 | 0.0257 | 1 |
| 1.21  | 2.5   | 0.0258 | 1 |
| 4.69  | -1.9  | 0.0258 | 1 |

|       |       |        |   |
|-------|-------|--------|---|
| 4.35  | -2.18 | 0.026  | 1 |
| -0.67 | 3.57  | 0.026  | 1 |
| -0.67 | 3.57  | 0.026  | 1 |
| 1.07  | 2.45  | 0.0261 | 1 |
| 3.86  | -2.77 | 0.0261 | 1 |
| 3.8   | -2.71 | 0.0261 | 1 |
| 1.45  | 2.24  | 0.0261 | 1 |
| 1.45  | 2.26  | 0.0261 | 1 |
| 3.42  | 1.56  | 0.0262 | 1 |
| 3.61  | -2.97 | 0.0262 | 1 |
| 4.61  | -2.14 | 0.0263 | 1 |
| 3.58  | -2.95 | 0.0263 | 1 |
| 3.56  | -2.92 | 0.0264 | 1 |
| 3.56  | -2.92 | 0.0264 | 1 |
| 4.97  | -1.77 | 0.0264 | 1 |
| 1.34  | 2.35  | 0.0266 | 1 |
| 1.08  | 2.6   | 0.0266 | 1 |
| 3.56  | -2.93 | 0.0266 | 1 |
| 1.84  | 2.11  | 0.0266 | 1 |
| 4.44  | -2.05 | 0.0267 | 1 |
| 2.88  | 1.85  | 0.0267 | 1 |
| -0.67 | 3.48  | 0.0267 | 1 |
| -0.67 | 3.48  | 0.0267 | 1 |
| 3.84  | -2.5  | 0.0268 | 1 |
| 4.6   | -1.87 | 0.0269 | 1 |
| 3.56  | -2.92 | 0.0269 | 1 |
| 1.21  | 2.47  | 0.0269 | 1 |
| 4.29  | 1.26  | 0.0269 | 1 |
| 1.07  | 2.36  | 0.0269 | 1 |
| 3.98  | -2.55 | 0.027  | 1 |
| 0.55  | 2.6   | 0.027  | 1 |
| 0.55  | 2.6   | 0.027  | 1 |
| 3.59  | -2.95 | 0.027  | 1 |
| 2.92  | 1.71  | 0.027  | 1 |
| 3.77  | -2.69 | 0.0271 | 1 |
| 4.52  | -2.09 | 0.0271 | 1 |
| 0.07  | 2.84  | 0.0271 | 1 |
| 1.56  | 2.3   | 0.0271 | 1 |
| 1.84  | 2.24  | 0.0272 | 1 |
| 4.54  | -1.95 | 0.0272 | 1 |
| 4.6   | -1.87 | 0.0272 | 1 |
| 0.07  | 2.9   | 0.0272 | 1 |
| 3.58  | 1.46  | 0.0273 | 1 |



|       |       |        |   |
|-------|-------|--------|---|
| -0.67 | 3.34  | 0.0283 | 1 |
| -0.67 | 3.34  | 0.0283 | 1 |
| 0.75  | 2.59  | 0.0283 | 1 |
| 0.75  | 2.59  | 0.0283 | 1 |
| 0.75  | 2.59  | 0.0283 | 1 |
| 0.75  | 2.59  | 0.0283 | 1 |
| -0.25 | 3.07  | 0.0283 | 1 |
| 1.21  | 2.45  | 0.0283 | 1 |
| 0.56  | 2.68  | 0.0283 | 1 |
| 0.56  | 2.68  | 0.0283 | 1 |
| 4.5   | -2.19 | 0.0284 | 1 |
| 2.51  | 1.95  | 0.0284 | 1 |
| 3.31  | 1.57  | 0.0285 | 1 |
| 2.4   | 1.94  | 0.0285 | 1 |
| 3.82  | -2.47 | 0.0286 | 1 |
| 3.6   | -2.97 | 0.0286 | 1 |
| 3.53  | -2.9  | 0.0286 | 1 |
| 3.53  | -2.9  | 0.0286 | 1 |
| 3.88  | -2.53 | 0.0286 | 1 |
| 4.4   | -2.26 | 0.0287 | 1 |
| 0.92  | 2.45  | 0.0288 | 1 |
| 3.75  | -2.67 | 0.0288 | 1 |
| 5.06  | -1.59 | 0.0288 | 1 |
| 2.27  | 1.96  | 0.0288 | 1 |
| -0.25 | 3.1   | 0.0288 | 1 |
| -0.25 | 3.1   | 0.0288 | 1 |
| 3.24  | 1.56  | 0.029  | 1 |
| 3.55  | -2.92 | 0.029  | 1 |
| 3.94  | -2.59 | 0.029  | 1 |
| 3.94  | -2.59 | 0.029  | 1 |
| 3.53  | -2.9  | 0.029  | 1 |
| 1.45  | 2.29  | 0.0291 | 1 |
| 3.81  | -2.47 | 0.0291 | 1 |
| 0.55  | 2.56  | 0.0292 | 1 |
| 0.55  | 2.58  | 0.0292 | 1 |
| 4.32  | 1.21  | 0.0292 | 1 |
| 3.53  | -2.9  | 0.0292 | 1 |
| 2.07  | 2.02  | 0.0292 | 1 |
| 2.92  | 1.71  | 0.0292 | 1 |
| 3.58  | -2.95 | 0.0293 | 1 |
| 4.74  | -1.75 | 0.0293 | 1 |
| 3.25  | 1.66  | 0.0293 | 1 |
| 3.07  | 1.65  | 0.0293 | 1 |

|       |       |        |   |
|-------|-------|--------|---|
| 2.66  | 1.82  | 0.0294 | 1 |
| -0.67 | 3.39  | 0.0294 | 1 |
| -0.67 | 3.39  | 0.0294 | 1 |
| -0.67 | 3.39  | 0.0294 | 1 |
| -0.67 | 3.39  | 0.0294 | 1 |
| -0.67 | 3.39  | 0.0294 | 1 |
| -0.67 | 3.39  | 0.0294 | 1 |
| 4.3   | -2.13 | 0.0294 | 1 |
| 0.92  | 2.54  | 0.0295 | 1 |
| 0.92  | 2.54  | 0.0295 | 1 |
| 0.34  | 2.82  | 0.0295 | 1 |
| 4.11  | 1.24  | 0.0295 | 1 |
| 0.92  | 2.45  | 0.0295 | 1 |
| 3.84  | -2.5  | 0.0296 | 1 |
| 3.51  | -2.87 | 0.0296 | 1 |
| 2.28  | 2.07  | 0.0296 | 1 |
| 0.07  | 2.96  | 0.0297 | 1 |
| 3.51  | -2.87 | 0.0297 | 1 |
| 3.51  | -2.87 | 0.0297 | 1 |
| 3.73  | -2.64 | 0.0297 | 1 |
| 2.21  | 2     | 0.0298 | 1 |
| 1.34  | 2.41  | 0.0298 | 1 |
| 0.92  | 2.47  | 0.0299 | 1 |
| 3.73  | -2.64 | 0.0299 | 1 |
| 1.55  | 2.16  | 0.0299 | 1 |
| 3.53  | -2.9  | 0.03   | 1 |
| 3.53  | -2.9  | 0.03   | 1 |
| 2.45  | 1.92  | 0.03   | 1 |
| 1.75  | 2.23  | 0.03   | 1 |
| 3.55  | -2.92 | 0.0301 | 1 |
| 3.6   | -2.97 | 0.0302 | 1 |
| 0.34  | 2.75  | 0.0302 | 1 |
| 5.38  | -1.3  | 0.0302 | 1 |
| 2.27  | 1.97  | 0.0303 | 1 |
| 0.56  | 2.58  | 0.0303 | 1 |
| 4.29  | -2.12 | 0.0304 | 1 |
| 0.55  | 2.64  | 0.0305 | 1 |
| 3.5   | -2.87 | 0.0305 | 1 |
| 3.5   | -2.87 | 0.0305 | 1 |
| 4.13  | -2.25 | 0.0306 | 1 |
| 4.1   | -2.29 | 0.0307 | 1 |
| 4.26  | -2.17 | 0.0307 | 1 |

|       |       |        |   |
|-------|-------|--------|---|
| -0.25 | 3.04  | 0.0307 | 1 |
| -0.25 | 3.04  | 0.0307 | 1 |
| 3.58  | -2.95 | 0.0308 | 1 |
| 3.58  | -2.95 | 0.0308 | 1 |
| 3.92  | -2.49 | 0.0308 | 1 |
| 0.56  | 2.64  | 0.0308 | 1 |
| 4.67  | -1.79 | 0.0309 | 1 |
| 6.13  | -1.07 | 0.0309 | 1 |
| 3.92  | -2.57 | 0.031  | 1 |
| 4.2   | 1.38  | 0.0311 | 1 |
| -0.25 | 3.1   | 0.0311 | 1 |
| 1.08  | 2.61  | 0.0312 | 1 |
| 4.01  | -2.67 | 0.0312 | 1 |
| 3.94  | -2.51 | 0.0313 | 1 |
| 3.55  | -2.92 | 0.0314 | 1 |
| 3.55  | -2.92 | 0.0314 | 1 |
| 1.2   | 2.36  | 0.0315 | 1 |
| 3.37  | 1.53  | 0.0315 | 1 |
| 0.55  | 2.53  | 0.0315 | 1 |
| 0.34  | 2.79  | 0.0315 | 1 |
| 1.21  | 2.42  | 0.0315 | 1 |
| 4.16  | 1.26  | 0.0316 | 1 |
| 3.7   | -2.62 | 0.0317 | 1 |
| 4.85  | -1.67 | 0.0317 | 1 |
| 2.88  | 1.68  | 0.0318 | 1 |
| 4.59  | -1.87 | 0.0318 | 1 |
| 3.48  | -2.85 | 0.0318 | 1 |
| 3.48  | -2.85 | 0.0318 | 1 |
| 3.72  | -3.09 | 0.0318 | 1 |
| 1.75  | 2.14  | 0.0318 | 1 |
| 3.48  | -2.84 | 0.0319 | 1 |
| 3.48  | -2.84 | 0.0319 | 1 |
| 3.48  | -2.84 | 0.0319 | 1 |
| 4.78  | -1.65 | 0.032  | 1 |
| 0.92  | 2.57  | 0.032  | 1 |
| 3.77  | -2.43 | 0.032  | 1 |
| 2.92  | 1.72  | 0.0321 | 1 |
| 1.21  | 2.41  | 0.0322 | 1 |
| 2.84  | 1.78  | 0.0322 | 1 |
| 3.48  | -2.84 | 0.0325 | 1 |
| 2.07  | 2     | 0.0325 | 1 |
| 3.96  | -2.53 | 0.0326 | 1 |
| 2.39  | 1.9   | 0.0326 | 1 |









|       |       |        |   |
|-------|-------|--------|---|
| -0.67 | 3.24  | 0.0362 | 1 |
| -0.67 | 3.24  | 0.0362 | 1 |
| -0.67 | 3.24  | 0.0362 | 1 |
| -0.67 | 3.24  | 0.0362 | 1 |
| -0.67 | 3.24  | 0.0362 | 1 |
| -0.67 | 3.24  | 0.0362 | 1 |
| 3.42  | -2.79 | 0.0363 | 1 |
| 4.7   | -1.8  | 0.0363 | 1 |
| 4.4   | -2.26 | 0.0363 | 1 |
| 3.5   | -2.87 | 0.0364 | 1 |
| 3.5   | -2.87 | 0.0364 | 1 |
| 0.34  | 2.67  | 0.0365 | 1 |
| 1.33  | 2.15  | 0.0365 | 1 |
| 1.33  | 2.15  | 0.0365 | 1 |
| 3.75  | -2.66 | 0.0365 | 1 |
| 0.55  | 2.51  | 0.0365 | 1 |
| 4.42  | -1.97 | 0.0365 | 1 |
| 0.75  | 2.5   | 0.0366 | 1 |
| 4.35  | 1.16  | 0.0366 | 1 |
| 0.92  | 2.56  | 0.0366 | 1 |
| 2     | 2     | 0.0367 | 1 |
| 1.92  | 2.15  | 0.0369 | 1 |
| 4.52  | -1.79 | 0.0369 | 1 |
| 3.43  | -2.79 | 0.0369 | 1 |
| 3.58  | 1.41  | 0.0369 | 1 |
| 3.21  | 1.56  | 0.0369 | 1 |
| 1.34  | 2.33  | 0.037  | 1 |
| 1.34  | 2.33  | 0.037  | 1 |
| 2.33  | 1.86  | 0.037  | 1 |
| 2.92  | 1.67  | 0.037  | 1 |
| 2.51  | 1.94  | 0.0371 | 1 |
| 1.45  | 2.14  | 0.0371 | 1 |
| 5.24  | -1.43 | 0.0373 | 1 |
| 2.14  | 1.99  | 0.0373 | 1 |
| 3.7   | -2.36 | 0.0373 | 1 |
| 3.63  | -2.99 | 0.0373 | 1 |
| 4.39  | -1.94 | 0.0373 | 1 |
| 1.56  | 2.16  | 0.0373 | 1 |
| 4.52  | -1.79 | 0.0374 | 1 |
| 0.56  | 2.59  | 0.0374 | 1 |
| 2.21  | 1.93  | 0.0374 | 1 |
| 3.68  | 1.43  | 0.0375 | 1 |
| 3.21  | 1.68  | 0.0375 | 1 |

|       |       |        |   |
|-------|-------|--------|---|
| 4.53  | -1.8  | 0.0376 | 1 |
| 3.73  | 1.38  | 0.0376 | 1 |
| 0.92  | 2.44  | 0.0376 | 1 |
| 0.07  | 2.73  | 0.0376 | 1 |
| 3.3   | 1.51  | 0.0377 | 1 |
| 3.39  | -2.76 | 0.0378 | 1 |
| 3.39  | -2.76 | 0.0378 | 1 |
| 4.92  | -1.68 | 0.0378 | 1 |
| 0.91  | 2.33  | 0.0379 | 1 |
| 4.11  | -2.08 | 0.038  | 1 |
| 0.07  | 2.78  | 0.0381 | 1 |
| 0.07  | 2.78  | 0.0381 | 1 |
| 3.39  | -2.76 | 0.0381 | 1 |
| 1.21  | 2.37  | 0.0382 | 1 |
| 0.55  | 2.46  | 0.0382 | 1 |
| 3.34  | 1.51  | 0.0382 | 1 |
| 3.42  | -2.79 | 0.0382 | 1 |
| 4.32  | -2.18 | 0.0382 | 1 |
| 4.3   | -1.96 | 0.0382 | 1 |
| 3.4   | -2.76 | 0.0382 | 1 |
| 3.21  | 1.55  | 0.0383 | 1 |
| 1.46  | 2.29  | 0.0383 | 1 |
| 4.8   | -1.73 | 0.0383 | 1 |
| 3.45  | -2.81 | 0.0383 | 1 |
| 0.07  | 2.8   | 0.0383 | 1 |
| 3.94  | 1.25  | 0.0384 | 1 |
| 2.71  | 1.77  | 0.0384 | 1 |
| 3.68  | -2.34 | 0.0384 | 1 |
| 0.75  | 2.58  | 0.0384 | 1 |
| 1.2   | 2.34  | 0.0385 | 1 |
| 3.75  | -2.4  | 0.0385 | 1 |
| 4.22  | -2.05 | 0.0385 | 1 |
| 4.21  | -2.04 | 0.0388 | 1 |
| 3.39  | -2.76 | 0.0388 | 1 |
| 3.39  | -2.76 | 0.0388 | 1 |
| 1.21  | 2.34  | 0.0388 | 1 |
| 2.88  | 1.88  | 0.0388 | 1 |
| -0.25 | 2.99  | 0.0388 | 1 |
| -0.25 | 2.99  | 0.0388 | 1 |
| 4.3   | -2.17 | 0.0389 | 1 |
| 5.73  | -1.08 | 0.0389 | 1 |
| 3.68  | -2.34 | 0.0389 | 1 |
| 3.4   | -2.76 | 0.039  | 1 |

|      |       |        |   |
|------|-------|--------|---|
| 0.56 | 2.5   | 0.0391 | 1 |
| 3.96 | -2.15 | 0.0392 | 1 |
| 4.77 | -1.87 | 0.0392 | 1 |
| 4.72 | -1.59 | 0.0393 | 1 |
| 4.93 | -1.47 | 0.0393 | 1 |
| 4.87 | -1.61 | 0.0393 | 1 |
| 5.81 | -1.09 | 0.0393 | 1 |
| 3.43 | -2.79 | 0.0394 | 1 |
| 0.92 | 2.36  | 0.0395 | 1 |
| 3.63 | -2.55 | 0.0395 | 1 |
| 3.42 | -2.79 | 0.0395 | 1 |
| 3.61 | -2.52 | 0.0395 | 1 |
| 4.02 | 1.26  | 0.0396 | 1 |
| 1.21 | 2.23  | 0.0396 | 1 |
| 3.68 | 1.36  | 0.0396 | 1 |
| 0.75 | 2.49  | 0.0397 | 1 |
| 4.21 | -2.04 | 0.0397 | 1 |
| 3.39 | -2.76 | 0.0397 | 1 |
| 1.92 | 2.02  | 0.0398 | 1 |
| 3.82 | -2.39 | 0.0398 | 1 |
| 2.71 | 1.72  | 0.0398 | 1 |
| 3.51 | 1.41  | 0.0399 | 1 |
| 0.56 | 2.7   | 0.0399 | 1 |
| 0.56 | 2.7   | 0.0399 | 1 |
| 4.77 | -1.7  | 0.0399 | 1 |
| 3.37 | -2.73 | 0.04   | 1 |
| 3.37 | -2.73 | 0.04   | 1 |
| 3.98 | -2.16 | 0.0401 | 1 |
| 3.45 | -2.81 | 0.0402 | 1 |
| 5.08 | -1.37 | 0.0402 | 1 |
| 3.86 | -2.22 | 0.0402 | 1 |
| 3.88 | -2.24 | 0.0402 | 1 |
| 3.36 | -2.73 | 0.0402 | 1 |
| 3.36 | -2.73 | 0.0402 | 1 |
| 3.36 | -2.73 | 0.0402 | 1 |
| 3.36 | -2.73 | 0.0402 | 1 |
| 3.36 | -2.73 | 0.0402 | 1 |
| 3.21 | 1.53  | 0.0403 | 1 |
| 0.56 | 2.46  | 0.0404 | 1 |
| 4.43 | -1.9  | 0.0404 | 1 |
| 1.21 | 2.48  | 0.0404 | 1 |
| 3.61 | 1.34  | 0.0404 | 1 |
| 4.52 | -1.83 | 0.0405 | 1 |



|       |       |        |   |
|-------|-------|--------|---|
| -0.67 | 3.2   | 0.0412 | 1 |
| -0.67 | 3.2   | 0.0412 | 1 |
| -0.67 | 3.2   | 0.0412 | 1 |
| 1.75  | 2.05  | 0.0413 | 1 |
| 3.14  | 1.53  | 0.0413 | 1 |
| 4.18  | -2.01 | 0.0414 | 1 |
| 2     | 1.97  | 0.0414 | 1 |
| 4.57  | -1.96 | 0.0415 | 1 |
| 3.36  | -2.73 | 0.0415 | 1 |
| 3.36  | -2.73 | 0.0415 | 1 |
| 3.36  | -2.73 | 0.0415 | 1 |
| 3.5   | 1.38  | 0.0415 | 1 |
| 2.5   | 1.78  | 0.0415 | 1 |
| 0.92  | 2.5   | 0.0415 | 1 |
| 1.45  | 2.17  | 0.0416 | 1 |
| 3.33  | 1.44  | 0.0416 | 1 |
| 3.86  | 1.39  | 0.0416 | 1 |
| 2.27  | 1.88  | 0.0417 | 1 |
| 0.56  | 2.63  | 0.0417 | 1 |
| 2.21  | 1.96  | 0.0417 | 1 |
| 2.45  | 1.86  | 0.0418 | 1 |
| 1.92  | 1.97  | 0.0418 | 1 |
| 4.42  | -1.82 | 0.0419 | 1 |
| 1.76  | 2.22  | 0.042  | 1 |
| 1.21  | 2.32  | 0.042  | 1 |
| 3.58  | -2.5  | 0.042  | 1 |
| 4.8   | -1.52 | 0.042  | 1 |
| 1.66  | 2.29  | 0.0421 | 1 |
| 0.55  | 2.43  | 0.0422 | 1 |
| 0.55  | 2.43  | 0.0422 | 1 |
| 2.34  | 1.87  | 0.0423 | 1 |
| 0.07  | 2.85  | 0.0425 | 1 |
| 3.36  | -2.73 | 0.0426 | 1 |
| 3.36  | -2.73 | 0.0426 | 1 |
| 3.36  | -2.73 | 0.0426 | 1 |
| 0.55  | 2.55  | 0.0426 | 1 |
| 3.34  | -2.7  | 0.0427 | 1 |
| 1.76  | 2.31  | 0.0427 | 1 |
| 3.34  | -2.7  | 0.0427 | 1 |
| 3.34  | -2.7  | 0.0427 | 1 |
| 0.75  | 2.47  | 0.0428 | 1 |
| 0.75  | 2.53  | 0.0428 | 1 |
| 3.63  | -2.29 | 0.0428 | 1 |

|       |       |        |   |
|-------|-------|--------|---|
| 0.75  | 2.45  | 0.0429 | 1 |
| 0.75  | 2.45  | 0.0429 | 1 |
| 3.28  | 1.51  | 0.0429 | 1 |
| 0.07  | 2.78  | 0.0429 | 1 |
| 0.07  | 2.78  | 0.0429 | 1 |
| 3.33  | -2.7  | 0.043  | 1 |
| 3.33  | -2.7  | 0.043  | 1 |
| 3.33  | -2.7  | 0.043  | 1 |
| 2.61  | 1.78  | 0.043  | 1 |
| 3.34  | -2.7  | 0.043  | 1 |
| 2.71  | 1.75  | 0.043  | 1 |
| 4.55  | -1.86 | 0.043  | 1 |
| 4.44  | 1.08  | 0.0431 | 1 |
| 4.14  | -2.06 | 0.0431 | 1 |
| 3.31  | 1.46  | 0.0431 | 1 |
| 0.56  | 2.52  | 0.0432 | 1 |
| 4.56  | -1.95 | 0.0433 | 1 |
| 4.19  | -2.25 | 0.0433 | 1 |
| 2.15  | 2.12  | 0.0433 | 1 |
| 4.36  | -1.91 | 0.0433 | 1 |
| 4.02  | -2.14 | 0.0433 | 1 |
| 3.79  | -2.37 | 0.0433 | 1 |
| 3.42  | -2.78 | 0.0434 | 1 |
| 3.65  | -2.57 | 0.0434 | 1 |
| 1.66  | 2.04  | 0.0435 | 1 |
| 3.77  | 1.32  | 0.0435 | 1 |
| 4.35  | -1.9  | 0.0435 | 1 |
| 3.33  | -2.7  | 0.0436 | 1 |
| -0.25 | 2.92  | 0.0436 | 1 |
| -0.25 | 2.92  | 0.0436 | 1 |
| -0.25 | 2.92  | 0.0436 | 1 |
| 3.34  | -2.7  | 0.0437 | 1 |
| 1.65  | 2.22  | 0.0438 | 1 |
| 3.56  | -2.47 | 0.0438 | 1 |
| 3.56  | -2.47 | 0.0439 | 1 |
| 3.37  | 1.48  | 0.0439 | 1 |
| 1.93  | 2.21  | 0.044  | 1 |
| 3.82  | -2.18 | 0.044  | 1 |
| 3.82  | -2.18 | 0.044  | 1 |
| 0.07  | 2.69  | 0.044  | 1 |
| 3.36  | -2.73 | 0.044  | 1 |
| 3.98  | -2.27 | 0.0441 | 1 |
| 1.84  | 2.01  | 0.0441 | 1 |

|       |       |        |   |
|-------|-------|--------|---|
| 0.55  | 2.68  | 0.0441 | 1 |
| 1.66  | 2.14  | 0.0442 | 1 |
| 3.63  | 1.34  | 0.0442 | 1 |
| 5.36  | -1.28 | 0.0443 | 1 |
| 4.12  | -2.09 | 0.0444 | 1 |
| 3.33  | -2.7  | 0.0445 | 1 |
| 3.33  | -2.7  | 0.0445 | 1 |
| 1.56  | 2.16  | 0.0445 | 1 |
| 3.63  | -2.29 | 0.0446 | 1 |
| -0.67 | 3.27  | 0.0446 | 1 |
| -0.67 | 3.27  | 0.0446 | 1 |
| -0.67 | 3.27  | 0.0446 | 1 |
| -0.67 | 3.27  | 0.0446 | 1 |
| -0.67 | 3.27  | 0.0446 | 1 |
| -0.67 | 3.27  | 0.0446 | 1 |
| -0.67 | 3.27  | 0.0446 | 1 |
| -0.67 | 3.27  | 0.0446 | 1 |
| -0.67 | 3.27  | 0.0446 | 1 |
| 3.92  | -2.11 | 0.0446 | 1 |
| 3.47  | -2.84 | 0.0447 | 1 |
| 1.34  | 2.33  | 0.0447 | 1 |
| 3.79  | 1.26  | 0.0447 | 1 |
| 3.92  | 1.27  | 0.0447 | 1 |
| 0.56  | 2.61  | 0.0447 | 1 |
| 1.75  | 2.18  | 0.0448 | 1 |
| 1.34  | 2.18  | 0.0448 | 1 |
| 3.86  | 1.29  | 0.0449 | 1 |
| 0.56  | 2.57  | 0.0449 | 1 |
| 0.56  | 2.57  | 0.0449 | 1 |
| 4.18  | 1.15  | 0.0449 | 1 |
| 4.99  | -1.35 | 0.0449 | 1 |
| 3.48  | 1.39  | 0.045  | 1 |
| 0.56  | 2.43  | 0.0451 | 1 |
| 3     | 1.55  | 0.0451 | 1 |
| 4.34  | -1.88 | 0.0451 | 1 |
| 0.55  | 2.48  | 0.0452 | 1 |
| 3.66  | -2.32 | 0.0452 | 1 |
| 0.75  | 2.44  | 0.0453 | 1 |
| 4.46  | -1.74 | 0.0454 | 1 |
| 4.46  | -1.74 | 0.0454 | 1 |
| 3.31  | -2.67 | 0.0455 | 1 |
| 1.21  | 2.21  | 0.0456 | 1 |
| 1.08  | 2.36  | 0.0456 | 1 |
| 4.86  | -1.44 | 0.0457 | 1 |



|      |       |        |   |
|------|-------|--------|---|
| 4.24 | -2.11 | 0.0457 | 1 |
| 3.31 | -2.67 | 0.0457 | 1 |
| 0.75 | 2.42  | 0.0457 | 1 |
| 4.64 | -1.64 | 0.0457 | 1 |
| 3.33 | -2.7  | 0.0458 | 1 |
| 3.33 | -2.7  | 0.0458 | 1 |
| 3.36 | -2.73 | 0.0458 | 1 |
| 3.36 | -2.73 | 0.0458 | 1 |
| 3.36 | -2.73 | 0.0458 | 1 |
| 3.28 | 1.5   | 0.0459 | 1 |
| 3.3  | -2.67 | 0.0459 | 1 |
| 3.3  | -2.67 | 0.0459 | 1 |
| 3.3  | -2.67 | 0.0459 | 1 |
| 3.3  | -2.67 | 0.0459 | 1 |
| 3.42 | -2.78 | 0.0459 | 1 |
| 1.33 | 2.17  | 0.046  | 1 |
| 1.07 | 2.29  | 0.046  | 1 |
| 4.6  | 1.23  | 0.0461 | 1 |
| 1.56 | 2.11  | 0.0462 | 1 |
| 3.8  | -2.16 | 0.0462 | 1 |
| 0.75 | 2.49  | 0.0463 | 1 |
| 3.31 | -2.67 | 0.0463 | 1 |
| 3.94 | -2.12 | 0.0463 | 1 |
| 1.07 | 2.18  | 0.0464 | 1 |
| 0.75 | 2.33  | 0.0465 | 1 |
| 5.9  | -5.26 | 0.0465 | 1 |
| 3.94 | -2.24 | 0.0465 | 1 |
| 3.9  | -2.09 | 0.0466 | 1 |
| 3.3  | -2.67 | 0.0466 | 1 |
| 3.3  | -2.67 | 0.0466 | 1 |
| 2.66 | 1.83  | 0.0467 | 1 |
| 3.42 | 1.43  | 0.0468 | 1 |
| 3.39 | -2.76 | 0.0469 | 1 |
| 1.65 | 2.08  | 0.0469 | 1 |
| 4.61 | -1.71 | 0.047  | 1 |
| 3.28 | 1.58  | 0.047  | 1 |
| 5.45 | 1.05  | 0.0471 | 1 |
| 3.8  | 1.34  | 0.0471 | 1 |
| 2.56 | 1.78  | 0.0471 | 1 |
| 0.34 | 2.63  | 0.0472 | 1 |
| 0.34 | 2.63  | 0.0472 | 1 |
| 0.34 | 2.63  | 0.0472 | 1 |
| 0.34 | 2.63  | 0.0472 | 1 |

|      |       |        |   |
|------|-------|--------|---|
| 0.34 | 2.63  | 0.0472 | 1 |
| 3.88 | -2.07 | 0.0472 | 1 |
| 4.65 | -1.76 | 0.0473 | 1 |
| 3.56 | 1.42  | 0.0473 | 1 |
| 3.96 | -2.14 | 0.0473 | 1 |
| 3.31 | -2.67 | 0.0473 | 1 |
| 4.19 | -2.02 | 0.0474 | 1 |
| 3.33 | -2.7  | 0.0474 | 1 |
| 3.33 | -2.7  | 0.0474 | 1 |
| 3.33 | -2.7  | 0.0474 | 1 |
| 3.9  | -2.08 | 0.0474 | 1 |
| 5.56 | 0.9   | 0.0475 | 1 |
| 2.14 | 1.89  | 0.0475 | 1 |
| 1.45 | 2.12  | 0.0477 | 1 |
| 3.3  | -2.67 | 0.0478 | 1 |
| 3.3  | -2.67 | 0.0478 | 1 |
| 1.84 | 1.91  | 0.0478 | 1 |
| 1.75 | 2     | 0.0478 | 1 |
| 0.07 | 2.67  | 0.0479 | 1 |
| 0.07 | 2.64  | 0.048  | 1 |
| 0.07 | 2.64  | 0.048  | 1 |
| 3.96 | 1.2   | 0.048  | 1 |
| 3.36 | -2.73 | 0.048  | 1 |
| 4.15 | 1.33  | 0.0481 | 1 |
| 3.11 | 1.53  | 0.0481 | 1 |
| 1.45 | 2.14  | 0.0481 | 1 |
| 1.45 | 2.05  | 0.0481 | 1 |
| 3.55 | -2.47 | 0.0482 | 1 |
| 0.34 | 2.62  | 0.0484 | 1 |
| 4.23 | -1.96 | 0.0484 | 1 |
| 3.27 | -2.64 | 0.0484 | 1 |
| 3.27 | -2.64 | 0.0484 | 1 |
| 3.27 | -2.64 | 0.0484 | 1 |
| 2.96 | 1.57  | 0.0484 | 1 |
| 1.84 | 1.94  | 0.0485 | 1 |
| 1.34 | 2.25  | 0.0486 | 1 |
| 4.02 | -1.99 | 0.0486 | 1 |
| 3.27 | -2.64 | 0.0486 | 1 |
| 3.27 | -2.64 | 0.0486 | 1 |
| 3.27 | -2.64 | 0.0486 | 1 |
| 3.24 | 1.5   | 0.0486 | 1 |
| 3.28 | -2.64 | 0.0486 | 1 |
| 3.28 | -2.64 | 0.0486 | 1 |

|       |       |        |   |
|-------|-------|--------|---|
| 2.56  | 1.71  | 0.0486 | 1 |
| 0.56  | 2.47  | 0.0486 | 1 |
| 4.29  | -2.02 | 0.0486 | 1 |
| 3.56  | -2.48 | 0.0487 | 1 |
| 4.23  | -1.96 | 0.0489 | 1 |
| 2.28  | 1.9   | 0.0489 | 1 |
| 3.97  | -2.16 | 0.049  | 1 |
| 1.45  | 2.13  | 0.049  | 1 |
| 3.92  | -2.22 | 0.0491 | 1 |
| 3.27  | -2.64 | 0.0491 | 1 |
| 3.27  | -2.64 | 0.0491 | 1 |
| 3.27  | -2.64 | 0.0491 | 1 |
| 3.27  | -2.64 | 0.0491 | 1 |
| 4.39  | 1.08  | 0.0492 | 1 |
| 0.91  | 2.24  | 0.0492 | 1 |
| 3.92  | -2.22 | 0.0492 | 1 |
| 3.3   | -2.67 | 0.0492 | 1 |
| 3.59  | -2.24 | 0.0492 | 1 |
| 3.51  | -2.42 | 0.0494 | 1 |
| 3.53  | -2.45 | 0.0494 | 1 |
| 0.56  | 2.48  | 0.0494 | 1 |
| 3.33  | -2.7  | 0.0494 | 1 |
| 4.12  | 1.15  | 0.0495 | 1 |
| -0.67 | 3.13  | 0.0495 | 1 |
| -0.67 | 3.13  | 0.0495 | 1 |
| -0.67 | 3.13  | 0.0495 | 1 |
| -0.67 | 3.13  | 0.0495 | 1 |
| -0.67 | 3.13  | 0.0495 | 1 |
| -0.67 | 3.13  | 0.0495 | 1 |
| -0.67 | 3.13  | 0.0495 | 1 |
| -0.67 | 3.13  | 0.0495 | 1 |
| -0.67 | 3.13  | 0.0495 | 1 |
| -0.67 | 3.13  | 0.0495 | 1 |
| -0.67 | 3.13  | 0.0495 | 1 |
| 1.07  | 2.27  | 0.0495 | 1 |
| 3.56  | 1.43  | 0.0496 | 1 |
| 1.45  | 2.1   | 0.0496 | 1 |
| 3.28  | 1.57  | 0.0496 | 1 |
| 3.21  | 1.54  | 0.0498 | 1 |
| 4.66  | -1.64 | 0.0498 | 1 |
| 3.5   | -2.42 | 0.0499 | 1 |
| 0.56  | 2.5   | 0.0499 | 1 |

|      |       |        |   |
|------|-------|--------|---|
| 0.56 | 2.5   | 0.0499 | 1 |
| 5.01 | -1.31 | 0.05   | 1 |

**Table S5. 4C viewpoint primers for 4C-seq library preparation (1<sup>st</sup> PCR)**

| Genomic primer | sequence                                                       |
|----------------|----------------------------------------------------------------|
| SNRPN_U_Nlalll | <b>ACACTCTTTCCTACACGACGCTCTTCCGATCTTCATAAGAAGTTGAAGCATG</b>    |
| IPW_Nlalll     | <b>ACACTCTTTCCTACACGACGCTCTTCCGATCTGCTTTCTGGGAGAAGCCATG</b>    |
| PWAR1_Nlalll   | <b>ACACTCTTTCCTACACGACGCTCTTCCGATCTATATGCCACATTCACATG</b>      |
| UBE3A_U_Nlalll | <b>ACACTCTTTCCTACACGACGCTCTTCCGATCTTTTGGATACCTTTCATCATG</b>    |
| SNRPN_DpnII    | <b>GTGACTGGAGTTCAGACGTGTGCTCTTCCGATCTCAGTTGGCTCCTGTATCATT</b>  |
| IPW_DpnII      | <b>GTGACTGGAGTTCAGACGTGTGCTCTTCCGATCTCCATAACCATCTAGTCCACAA</b> |
| PWAR1_DpnII    | <b>GTGACTGGAGTTCAGACGTGTGCTCTTCCGATCTGCCCCAGGGAAAATAGTACC</b>  |
| UBE3A_U_DpnII  | <b>GTGACTGGAGTTCAGACGTGTGCTCTTCCGATCTTACTGTGGGTTTTTGGTTTT</b>  |

**Table S6. Illumina HT adapter primers (2<sup>nd</sup> PCR)**

| Illumina HT adapters  |                                                                       |
|-----------------------|-----------------------------------------------------------------------|
| Truseq_HT_D504        | AATGATACGGCGACCACCGAGATCTACACGGCTCTGAACACTCTTTCCTACACGACGCTCTTCCGATCT |
| Truseq_HT_D505        | AATGATACGGCGACCACCGAGATCTACACAGGCGAAGACACTCTTTCCTACACGACGCTCTTCCGATCT |
| Truseq_HT_D506        | AATGATACGGCGACCACCGAGATCTACACTAATCTTAACACTCTTTCCTACACGACGCTCTTCCGATCT |
| Truseq_HT_D507        | AATGATACGGCGACCACCGAGATCTACACCAGGACGTACACTCTTTCCTACACGACGCTCTTCCGATCT |
| Truseq_HT_D705_revcom | CAAGCAGAAGACGGCATAACGAGATTTCTGAATGTGACTGGAGTTCAGACGTGTGCTCTTCCGATCT   |
| Truseq_HT_D706_revcom | CAAGCAGAAGACGGCATAACGAGATACGAATTCGTGACTGGAGTTCAGACGTGTGCTCTTCCGATCT   |
| Truseq_HT_D707_revcom | CAAGCAGAAGACGGCATAACGAGATCTGAAGCTGTGACTGGAGTTCAGACGTGTGCTCTTCCGATCT   |
